# Supplementary material for: DNA analysis of Castanea sativa (sweet chestnut) in Britain and Ireland: Elucidating European origins and genepool diversity
Source: PubMed Central journal article supplement (PMC6760806; doi:10.1371/journal.pone.0222936), 2019-09-25
Supplement: pone.0222936.s006.pdf [file pone.0222936.s006.pdf]

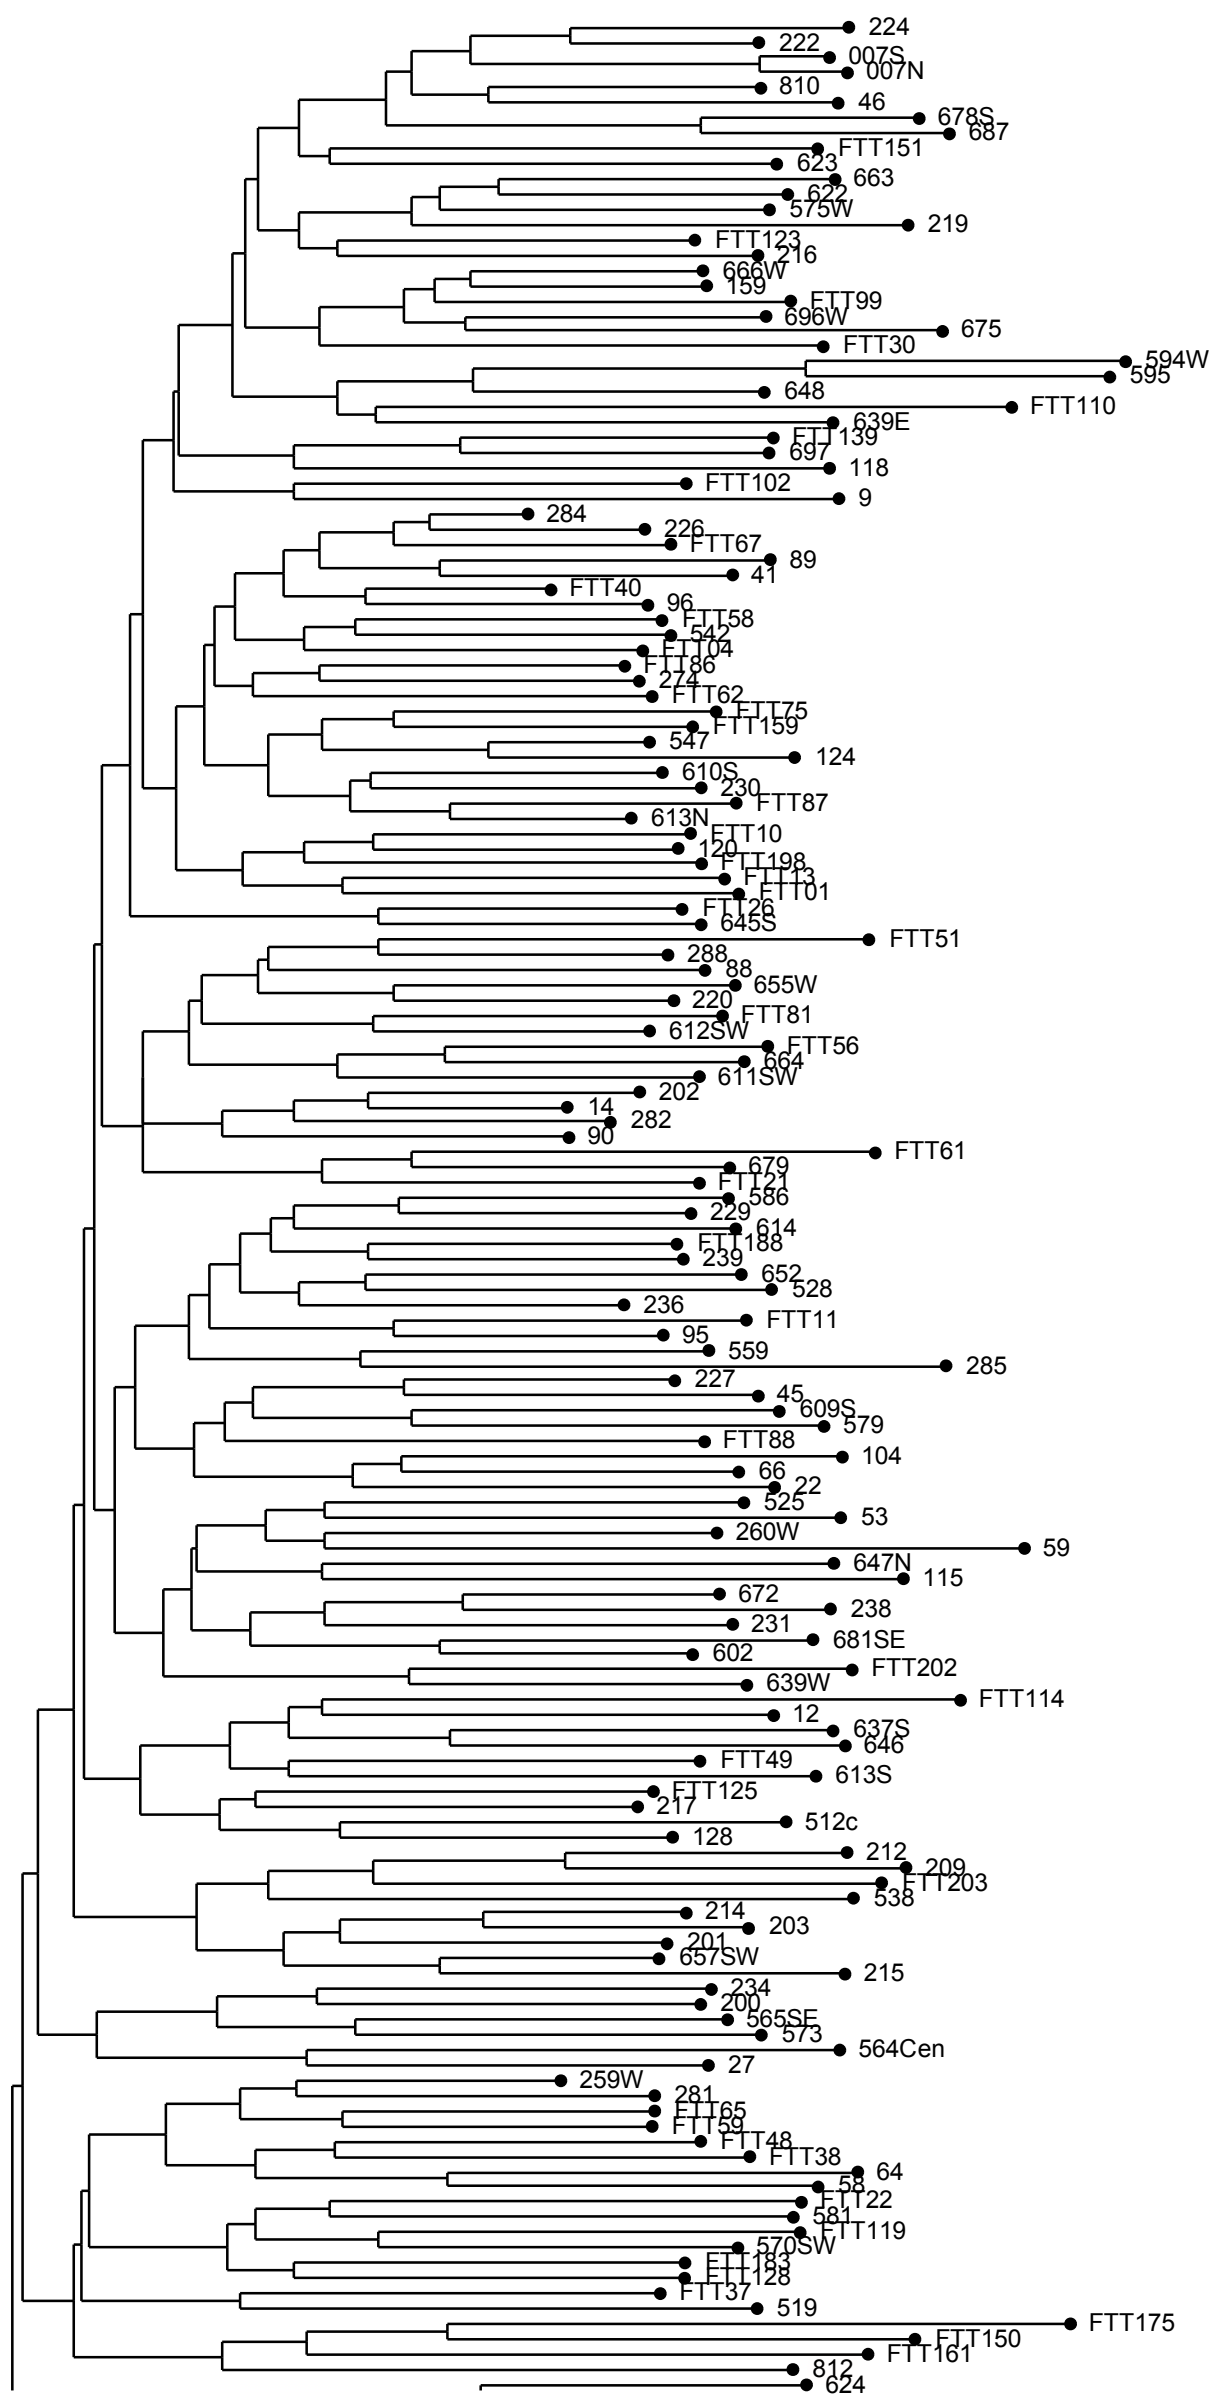

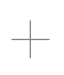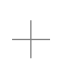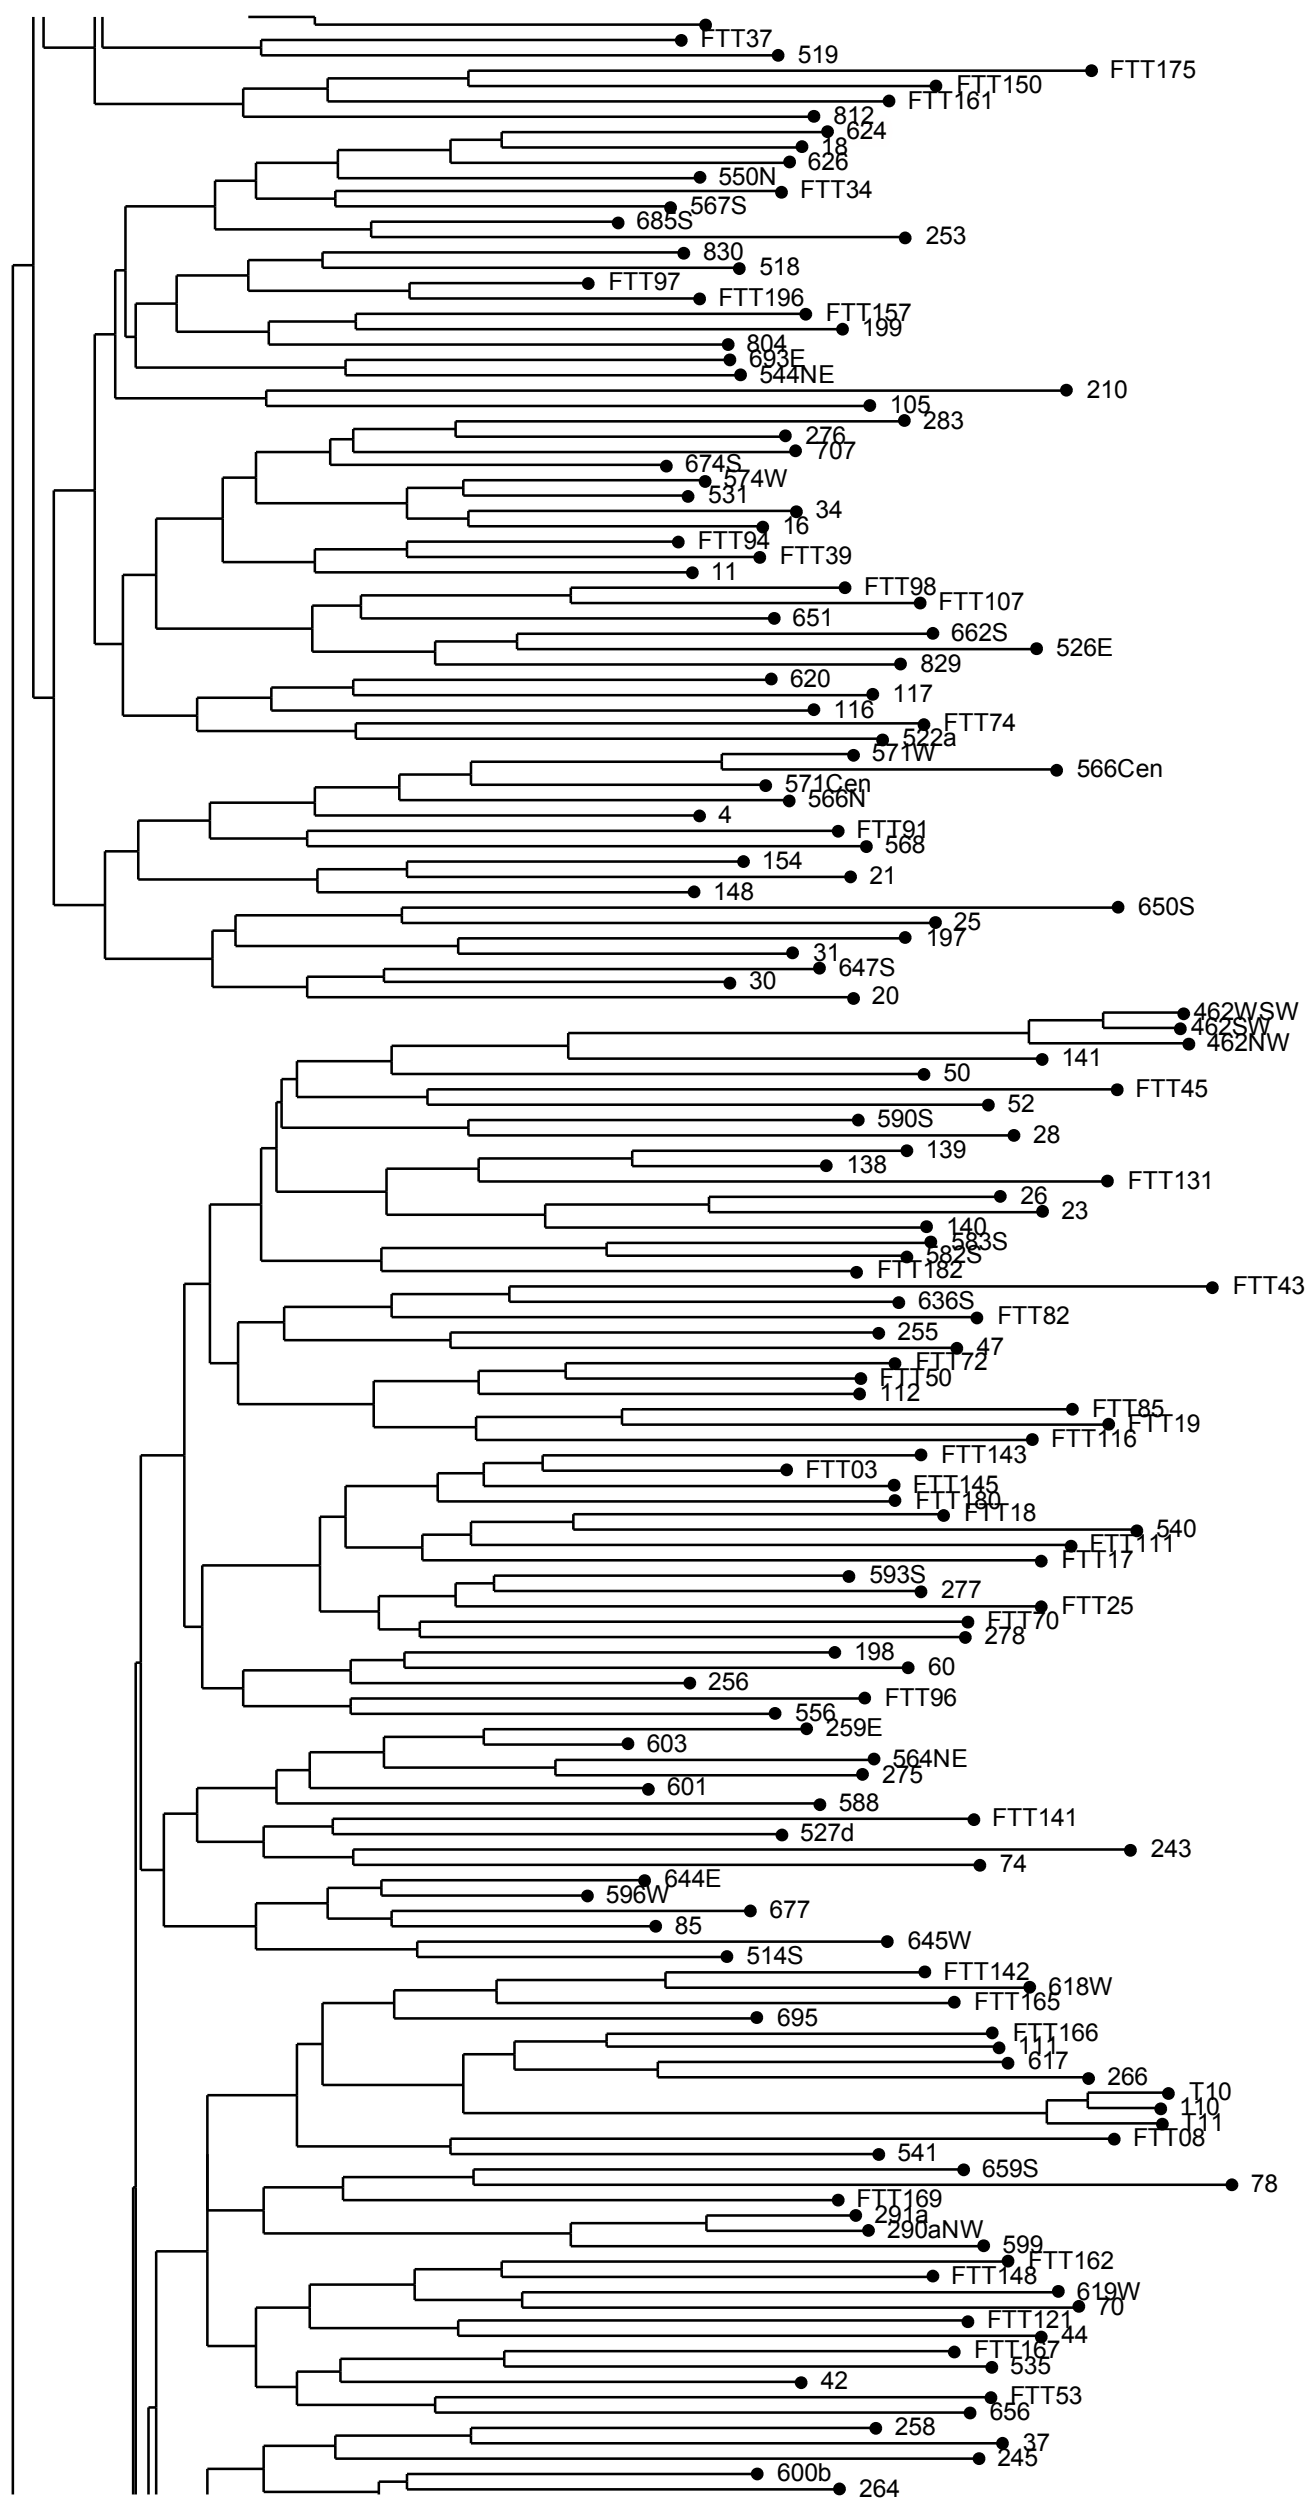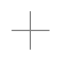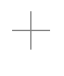

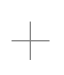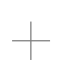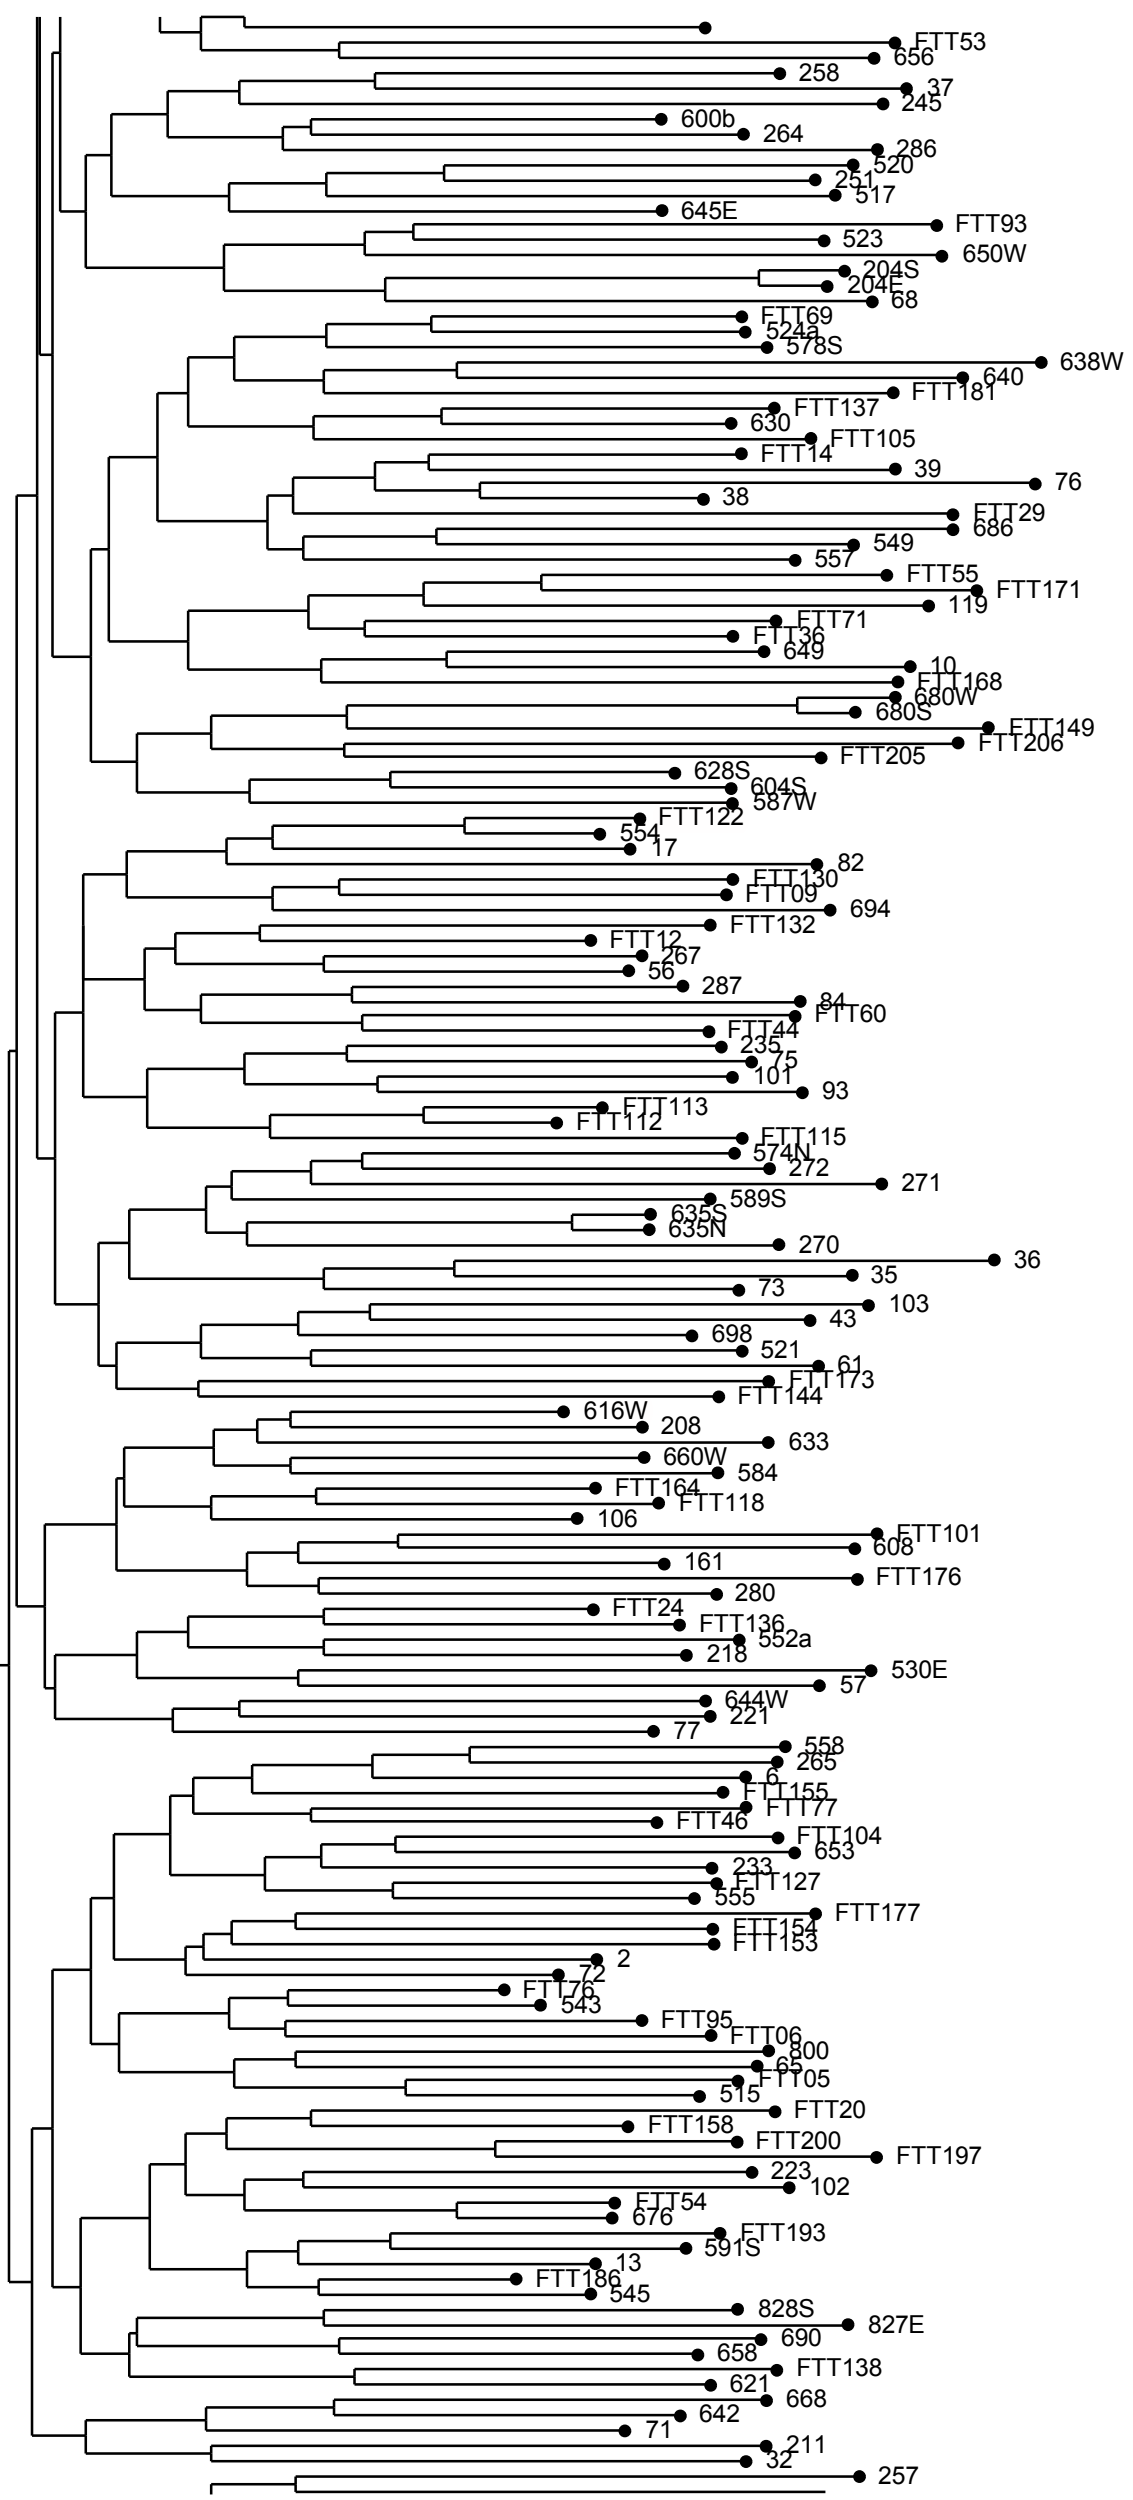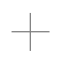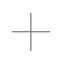

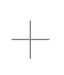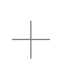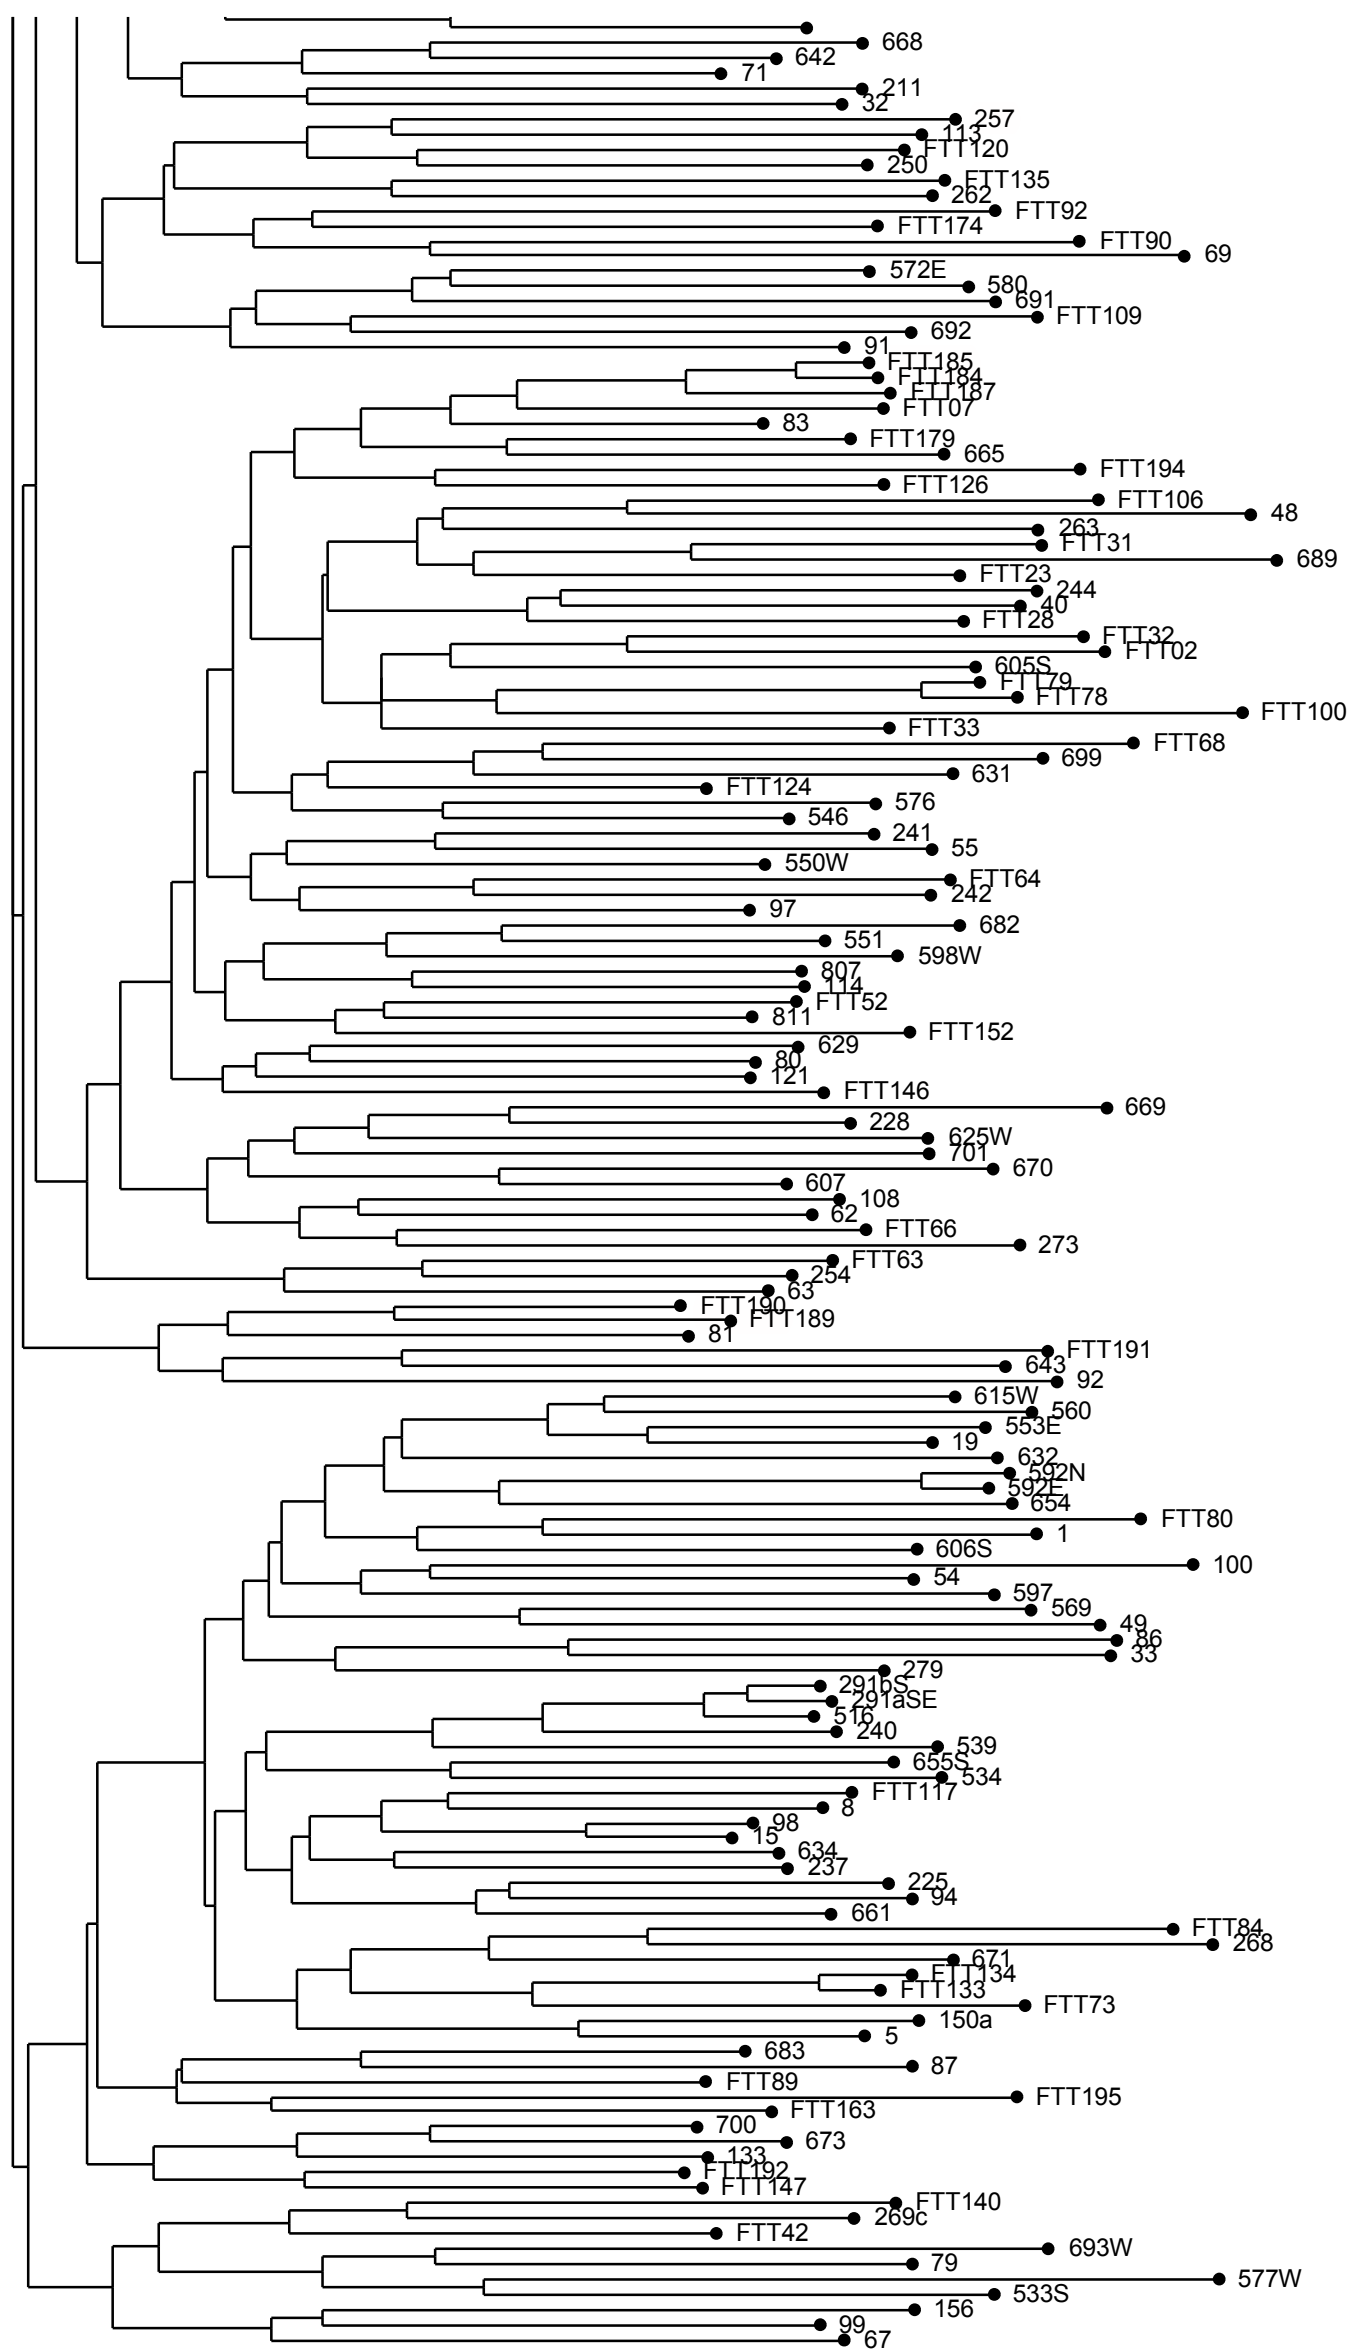

0 |-----| 0.1
