# Supplementary material for: DNA analysis of Castanea sativa (sweet chestnut) in Britain and Ireland: Elucidating European origins and genepool diversity
Source: PLoS One. 2019 Sep 25;14(9):e0222936. doi: 10.1371/journal.pone.0222936 (PMC6760806; doi:10.1371/journal.pone.0222936)
Supplement: S9 Table — (XLSX) [file pone.0222936.s015.xlsx]

## Sheet: <0.05 >0.2
admin counties 6 SSR 63 1294
39		Berks	0.0657	0.1347	0.0373	0.1251	0.0736	0.0952	0.105	0.0965	0.0752	0.0374	0.0852	0.1539	0.0965	0.1094	0.0539	0.1214	0.0653	0.076	0.0814	0.0557	0.0661	0.0469	0.0252	0.0901	0.0912	0.0464	0.0975	0.066	0.0692	0.1552	0.0744	0.0453	0.2142	0.1154	0.1218	0.0479	0.1405	0.2245	Berks
40		Caerphilly	0.0756	0.147	0.0644	0.1461	0.0868	0.0707	0.1127	0.1396	0.0256	0.0556	0.0601	0.1871	0.117	0.0981	0.0744	0.0947	0.0238	0.0424	0.1196	0.0737	0.0711	0.0712	0.0198	0.1047	0.1212	0.0596	0.1481	0.0899	0.1171	0.1906	0.0825	0.0662	0.1724	0.1089	0.1128	0.0483	0.0575	0.2527	Caerphilly
41		Cork	0.0846	0.2076	0.0971	0.143	0.094	0.1114	0.1633	0.1294	0.0827	0.0776	0.1156	0.1814	0.1368	0.1845	0.0602	0.1537	0.1309	0.0921	0.0892	0.1174	0.055	0.0428	0.0744	0.1102	0.1585	0.1286	0.143	0.0641	0.0951	0.2582	0.1602	0.1173	0.2982	0.1743	0.1913	0.0607	0.2372	0.2977	Cork
42		Cornwall	0.0582	0.1396	0.0448	0.1249	0.0911	0.0979	0.1175	0.1166	0.0533	0.0438	0.0968	0.1576	0.1308	0.1185	0.0306	0.1201	0.0652	0.0629	0.0947	0.0777	0.0437	0.0376	0.0313	0.1013	0.089	0.0643	0.078	0.0662	0.0786	0.183	0.0855	0.0503	0.2248	0.1369	0.1354	0.0455	0.148	0.223	Cornwall
43		Devon	0.0651	0.1627	0.0542	0.1478	0.0971	0.1186	0.1409	0.1314	0.0807	0.0617	0.11	0.1823	0.128	0.151	0.0547	0.134	0.0942	0.0889	0.1004	0.0689	0.0553	0.0387	0.0307	0.1133	0.1079	0.0732	0.0741	0.0696	0.0983	0.1885	0.1129	0.075	0.214	0.1481	0.1665	0.0511	0.1605	0.2515	Devon
44		E Sussex	0.0631	0.1492	0.0552	0.114	0.0734	0.1159	0.1161	0.1043	0.0894	0.0642	0.1022	0.1234	0.1179	0.1132	0.0456	0.1225	0.0599	0.0857	0.0612	0.0823	0.0556	0.0363	0.021	0.0606	0.0932	0.0465	0.0948	0.0392	0.0438	0.1734	0.0726	0.0579	0.2139	0.1135	0.1289	0.0204	0.1517	0.2118	E Sussex
45		Essex	0.065	0.138	0.0451	0.1454	0.0812	0.0838	0.1091	0.1202	0.0754	0.0601	0.0806	0.1727	0.1203	0.1301	0.0489	0.0903	0.0686	0.0698	0.0899	0.0624	0.0499	0.0519	0.0222	0.0877	0.1048	0.0606	0.0889	0.0574	0.0797	0.1751	0.0887	0.0697	0.1666	0.1099	0.143	0.0304	0.1101	0.2179	Essex
46		Glos	0.0642	0.1405	0.0391	0.1437	0.0802	0.0954	0.1141	0.1197	0.0647	0.0509	0.0835	0.1707	0.1136	0.1357	0.045	0.1026	0.0744	0.0694	0.0818	0.0541	0.0485	0.0375	0.0183	0.0922	0.0922	0.0612	0.0699	0.0607	0.0817	0.1627	0.0981	0.0633	0.1644	0.1165	0.1429	0.0358	0.1238	0.2245	Glos
47		Hants	0.0559	0.1322	0.042	0.1082	0.0698	0.1044	0.1064	0.1067	0.0569	0.0468	0.0847	0.1149	0.123	0.1204	0.0207	0.1103	0.0564	0.0634	0.0637	0.0491	0.0673	0.0103	0.0127	0.0259	0.05	0.0307	0.1138	0.0424	0.0312	0.1692	0.0705	0.0471	0.2219	0.1131	0.1372	0.0098	0.1632	0.213	Hants
48		Herefs	0.0866	0.1684	0.0555	0.1709	0.1225	0.1156	0.1437	0.1506	0.0769	0.0676	0.1058	0.2105	0.1458	0.1489	0.0651	0.1281	0.0838	0.0791	0.1294	0.0731	0.0573	0.0695	0.0306	0.1368	0.1286	0.0759	0.0948	0.101	0.131	0.2042	0.1312	0.0758	0.2003	0.1571	0.1756	0.0545	0.1138	0.2732	Herefs
49		Kent	0.0566	0.1415	0.0459	0.145	0.0807	0.0919	0.1178	0.128	0.0616	0.0446	0.0817	0.1769	0.1134	0.1373	0.0448	0.0987	0.0729	0.0744	0.0866	0.0721	0.0459	0.051	0.027	0.099	0.1112	0.0607	0.0722	0.0547	0.089	0.1768	0.0978	0.0671	0.177	0.1188	0.1427	0.0385	0.1234	0.2373	Kent
50		Kerry	0.0574	0.1451	0.0243	0.1443	0.1032	0.093	0.1201	0.1177	0.061	0.0385	0.0854	0.1844	0.1309	0.1411	0.0194	0.1058	0.076	0.0722	0.1087	0.0542	0.0476	0.0314	-0.0013	0.1192	0.1079	0.0566	0.0649	0.0653	0.092	0.1939	0.0975	0.0626	0.2116	0.1258	0.159	0.0325	0.1106	0.2681	Kerry
51		Mon	0.0812	0.166	0.0575	0.1655	0.1196	0.1097	0.1447	0.1471	0.0744	0.0707	0.0975	0.1967	0.1543	0.1551	0.0467	0.1323	0.0914	0.0648	0.1192	0.0659	0.0718	0.0479	0.0363	0.1145	0.1167	0.0941	0.1013	0.0856	0.1209	0.2055	0.1262	0.0938	0.2188	0.1592	0.177	0.0581	0.1279	0.2719	Mon
52		Norfolk	0.0403	0.1248	0.0248	0.155	0.0818	0.1019	0.1214	0.1421	0.0839	0.0354	0.0768	0.1761	0.1239	0.146	0.0427	0.1066	0.0726	0.1097	0.0884	0.0637	0.072	0.0317	0.0357	0.0992	0.0907	0.0653	0.0655	0.063	0.0867	0.1492	0.0791	0.0868	0.2172	0.1322	0.1628	0.0425	0.1759	0.2431	Norfolk
53		Powys	0.0657	0.1332	0.0359	0.1409	0.0804	0.077	0.116	0.122	0.062	0.0467	0.0691	0.1643	0.1012	0.1353	0.0514	0.1167	0.0617	0.0622	0.0705	0.0719	0.0575	0.0535	0.0213	0.0732	0.0846	0.0627	0.0966	0.059	0.0673	0.1401	0.0689	0.0681	0.2233	0.1362	0.142	0.0293	0.1415	0.2085	Powys
54		Shrops	0.0519	0.1555	0.0322	0.0905	0.075	0.0994	0.1008	0.0923	0.0416	0.0271	0.0648	0.1197	0.1057	0.1178	0.0142	0.1222	0.0664	0.0569	0.0767	0.0304	0.0637	-0.0172	-0.0244	0.0853	0.08	0.041	0.0662	0.0382	0.0366	0.1687	0.057	0.0301	0.2284	0.0856	0.0941	0.025	0.1298	0.2525	Shrops
55		Som	0.0726	0.1714	0.0682	0.1635	0.0981	0.1157	0.1383	0.1445	0.0856	0.078	0.0986	0.1875	0.1468	0.1878	0.0642	0.1452	0.1172	0.0882	0.0859	0.0893	0.0701	0.0501	0.0453	0.1053	0.0922	0.1137	0.0733	0.064	0.0786	0.1791	0.1098	0.0933	0.2896	0.1677	0.1588	0.0624	0.2258	0.231	Som
56		Suff	0.0638	0.1755	0.0488	0.1557	0.0866	0.1144	0.1327	0.1359	0.0794	0.0556	0.0931	0.1791	0.1222	0.1584	0.0321	0.1333	0.0894	0.07	0.078	0.0536	0.0208	0.0285	0.0137	0.0851	0.104	0.0665	0.0742	0.0455	0.0871	0.2065	0.1158	0.0686	0.2354	0.1499	0.1726	0.0292	0.1447	0.2631	Suff
57		Surrey	0.0842	0.1563	0.0365	0.1526	0.1121	0.1139	0.1439	0.131	0.0669	0.0522	0.0935	0.1862	0.1408	0.1336	0.0397	0.1342	0.0713	0.0674	0.1168	0.0675	0.0558	0.0643	-0.0001	0.1255	0.1301	0.0676	0.1072	0.0955	0.1045	0.1994	0.1107	0.0746	0.2005	0.14	0.1497	0.0338	0.1015	0.2657	Surrey
58		Tipp	0.1083	0.228	0.1011	0.1549	0.1015	0.1699	0.1309	0.1334	0.0911	0.1008	0.1337	0.1775	0.1259	0.1213	0.1062	0.1787	0.0979	0.0816	0.1249	0.0885	0.1312	0.0419	0.0617	0.1171	0.0817	0.0811	0.1473	0.0738	0.0929	0.2052	0.1014	0.0732	0.2911	0.131	0.1264	0.0948	0.1949	0.2764	Tipp
59		W Sussex	0.074	0.1604	0.0544	0.1421	0.0868	0.1119	0.133	0.1228	0.0753	0.0486	0.0888	0.1625	0.1416	0.1458	0.0217	0.1344	0.0773	0.0837	0.0767	0.0721	0.0476	0.0273	0.0301	0.0844	0.115	0.0808	0.0928	0.0562	0.0728	0.2017	0.1067	0.0949	0.2161	0.1382	0.1645	0.0388	0.1751	0.248	W Sussex
60		Waterford	0.0553	0.1424	0.04	0.1301	0.0887	0.09	0.1202	0.1177	0.0664	0.0569	0.0973	0.167	0.1315	0.142	0.0365	0.1085	0.0815	0.0762	0.086	0.0784	0.0431	0.0283	0.034	0.104	0.1022	0.0777	0.0784	0.0726	0.0824	0.2018	0.1161	0.0614	0.2245	0.1478	0.1571	0.0322	0.159	0.2305	Waterford
61		Wight	0.043	0.1239	0.0337	0.1339	0.0761	0.0789	0.0967	0.1209	0.0654	0.0394	0.063	0.1619	0.1195	0.1177	0.0271	0.0973	0.0651	0.0729	0.0764	0.0698	0.0331	0.041	0.0226	0.0702	0.0857	0.05	0.0903	0.0452	0.08	0.1644	0.074	0.0582	0.2247	0.1302	0.1287	0.0219	0.1177	0.2195	Wight
62		Wilts	0.0586	0.1538	0.0367	0.1432	0.0667	0.1105	0.1404	0.1232	0.0827	0.0491	0.0842	0.1691	0.1004	0.1635	0.0422	0.1391	0.1008	0.0828	0.0571	0.0646	0.061	0.0224	0.0154	0.0826	0.0959	0.0712	0.0922	0.061	0.0782	0.1713	0.1046	0.072	0.2504	0.1524	0.1527	0.0376	0.1666	0.2472	Wilts
63		Worcs	0.0557	0.1635	0.0579	0.1367	0.0922	0.1082	0.1217	0.1172	0.1016	0.0737	0.0945	0.1755	0.1369	0.1546	0.0513	0.1236	0.0981	0.1236	0.0973	0.0636	0.0528	0.0388	0.0155	0.118	0.1117	0.0687	0.0744	0.0518	0.0868	0.2009	0.0967	0.0703	0.2581	0.1364	0.1468	0.0459	0.1533	0.2603	Worcs
		pop	PT01	PT02	PT03	SP01	SP02	SP03	SP04	SP05	SP06	SP07	SP08	SP09	SP10	SP11	SP12	SP13	SP14	SP15	SP16	SP17	FR01	FR02	FR03	IT01	IT02	IT03	IT04	IT05	IT06	IT07	IT08	IT09	SK02	SK03	HU01	RO01	RO02	RO03
		EurEng Group C or D	D	D	D	D	C	D	D	D	C	D	C	D	C	D	C	D	D	C	C	C	C	C	C	C	D	C	C	C	D	D	D	D	C	D	D	C	C	D
seed zones 6 SSR 47 1327
39		303	0.0634	0.122	0.0553	0.1554	0.1041	0.0541	0.1117	0.1424	0.0426	0.0535	0.0643	0.1979	0.1426	0.1099	0.0715	0.0753	0.0309	0.064	0.1245	0.0878	0.0694	0.0786	0.0328	0.1092	0.1217	0.0595	0.1328	0.0976	0.1187	0.1852	0.0914	0.0663	0.1611	0.1236	0.1398	0.0394	0.0731	0.2307	303
40		304	0.067	0.1048	0.0325	0.1369	0.0855	0.0865	0.1083	0.1183	0.0698	0.026	0.0749	0.1673	0.0949	0.1076	0.0561	0.1059	0.0465	0.0784	0.0975	0.0911	0.0693	0.0896	0.0466	0.0993	0.103	0.04	0.1074	0.0899	0.0851	0.1393	0.0675	0.0534	0.1991	0.1267	0.1323	0.0448	0.1255	0.2084	304
41		305	0.0586	0.1492	0.0473	0.1378	0.0885	0.1057	0.1272	0.1231	0.0678	0.053	0.0965	0.1696	0.1231	0.1443	0.0434	0.1223	0.0871	0.0742	0.0885	0.0672	0.0455	0.0345	0.0281	0.1032	0.0939	0.0745	0.0637	0.0617	0.0854	0.1732	0.1022	0.067	0.2117	0.1419	0.15	0.0469	0.1581	0.2289	305
42		402	0.0316	0.1484	0.0379	0.1382	0.0892	0.0858	0.1236	0.1139	0.0751	0.0685	0.0942	0.1648	0.1306	0.1428	0.0544	0.1136	0.0966	0.078	0.0801	0.0252	0.0693	-0.0114	0.0182	0.0885	0.0676	0.0893	0.0658	0.041	0.0822	0.1614	0.0978	0.0712	0.2617	0.1379	0.1569	0.0311	0.1651	0.2496	402
43		403	0.0692	0.159	0.0446	0.1502	0.1055	0.1073	0.1339	0.1299	0.0761	0.0596	0.0962	0.1855	0.1321	0.1488	0.0531	0.1214	0.0904	0.0802	0.104	0.062	0.0534	0.0408	0.0197	0.1172	0.1084	0.0768	0.0717	0.0747	0.1025	0.1781	0.1154	0.0728	0.2011	0.1418	0.1632	0.0436	0.1342	0.253	403
44		404	0.0646	0.1401	0.0397	0.1447	0.082	0.0945	0.1148	0.122	0.0645	0.0511	0.0818	0.172	0.1161	0.1358	0.0429	0.1033	0.0747	0.0672	0.0839	0.0544	0.0484	0.038	0.0197	0.0923	0.093	0.0633	0.0732	0.0629	0.0866	0.1652	0.1004	0.0654	0.1674	0.1215	0.1441	0.0378	0.1205	0.2259	404
45		405	0.0593	0.1337	0.0403	0.1346	0.0781	0.0907	0.1124	0.1156	0.0662	0.0448	0.0791	0.1621	0.1123	0.1279	0.0385	0.0984	0.068	0.0712	0.0811	0.0618	0.0426	0.0446	0.0204	0.0892	0.1025	0.0569	0.0736	0.0551	0.0792	0.1652	0.092	0.0646	0.1672	0.115	0.1374	0.0329	0.1197	0.2219	405
46		406	0.0499	0.1513	0.0395	0.1465	0.0745	0.1061	0.1241	0.1333	0.075	0.0434	0.0812	0.1688	0.112	0.1461	0.0355	0.1159	0.0761	0.0789	0.0747	0.0626	0.0412	0.0289	0.0264	0.0839	0.0972	0.0628	0.0763	0.0496	0.0833	0.1776	0.1017	0.0759	0.21	0.1372	0.1629	0.0294	0.1499	0.2429	406
47		IRE	0.0642	0.1613	0.0497	0.1265	0.08	0.1011	0.1239	0.1075	0.0635	0.0535	0.0939	0.1602	0.1117	0.1379	0.0399	0.1151	0.0896	0.0669	0.0806	0.0705	0.0426	0.0234	0.0274	0.098	0.1034	0.0767	0.0812	0.0551	0.0784	0.1932	0.1151	0.067	0.2168	0.1327	0.1485	0.0416	0.1573	0.2431	IRE
		pop	PT01	PT02	PT03	SP01	SP02	SP03	SP04	SP05	SP06	SP07	SP08	SP09	SP10	SP11	SP12	SP13	SP14	SP15	SP16	SP17	FR01	FR02	FR03	IT01	IT02	IT03	IT04	IT05	IT06	IT07	IT08	IT09	SK02	SK03	HU01	RO01	RO02	RO03
site types 6 SSR 43 1332
39		A	0.0639	0.147	0.0433	0.1327	0.083	0.1011	0.1219	0.114	0.0701	0.0516	0.0898	0.1618	0.1151	0.1401	0.0396	0.1128	0.0856	0.0727	0.08	0.0604	0.0448	0.0293	0.0222	0.0925	0.0941	0.068	0.0695	0.0576	0.0784	0.1712	0.1037	0.0637	0.1904	0.1299	0.1466	0.0396	0.1422	0.2282	A
40		B	0.0619	0.1459	0.0511	0.1209	0.0684	0.1021	0.1039	0.1045	0.0732	0.0545	0.0865	0.1455	0.0947	0.1173	0.0524	0.1119	0.0678	0.0706	0.0712	0.0574	0.0534	0.0327	0.0226	0.0769	0.0865	0.0528	0.0823	0.0457	0.0608	0.1576	0.0813	0.0596	0.1878	0.1104	0.127	0.0353	0.1341	0.2131	B
41		C	0.0634	0.1374	0.0422	0.1507	0.0824	0.0934	0.117	0.1295	0.0657	0.0532	0.0841	0.1803	0.1173	0.1382	0.0482	0.0961	0.0751	0.0759	0.0919	0.0637	0.0503	0.0525	0.0253	0.1031	0.1045	0.0613	0.074	0.0671	0.0943	0.1696	0.1006	0.0665	0.1574	0.1164	0.1424	0.0381	0.114	0.2296	C
42		D	0.0668	0.1448	0.042	0.152	0.0949	0.0947	0.1249	0.1305	0.0612	0.0464	0.0817	0.1833	0.1286	0.1417	0.0402	0.1084	0.0752	0.0654	0.0958	0.0636	0.0455	0.0466	0.0251	0.1058	0.1104	0.0732	0.0753	0.072	0.1023	0.1782	0.1124	0.0747	0.1801	0.1355	0.1562	0.0444	0.1245	0.2427	D
43		E	0.0401	0.1038	0.0225	0.1498	0.0968	0.0788	0.1125	0.1298	0.0801	0.0473	0.0781	0.1782	0.1315	0.1226	0.0541	0.0909	0.0661	0.0889	0.1036	0.0676	0.0537	0.064	0.0244	0.1007	0.0945	0.0617	0.0846	0.0739	0.0962	0.1366	0.0807	0.0739	0.1818	0.1305	0.1512	0.0281	0.1143	0.2064	E
		pop	PT01	PT02	PT03	SP01	SP02	SP03	SP04	SP05	SP06	SP07	SP08	SP09	SP10	SP11	SP12	SP13	SP14	SP15	SP16	SP17	FR01	FR02	FR03	IT01	IT02	IT03	IT04	IT05	IT06	IT07	IT08	IT09	SK02	SK03	HU01	RO01	RO02	RO03
		EurEng Group C or D	D	D	D	D	C	D	D	D	C	D	C	D	C	D	C	D	D	C	C	C	C	C	C	C	D	C	C	C	D	D	D	D	C	D	D	C	C	D
					? Why not C		? Why C					? Why not C			? Why C					? Why C	? Why C														? Why C
Eur with Eng/Ire/Wal sites >3 (115 sites 6 SSR) Fst Genepop
		77 sites
			PT01	PT02	PT03	SP01	SP02	SP03	SP04	SP05	SP06	SP07	SP08	SP09	SP10	SP11	SP12	SP13	SP14	SP15	SP16	SP17	FR01	FR02	FR03	IT01	IT02	IT03	IT04	IT05	IT06	IT07	IT08	IT09	SK02	SK03	HU01	RO01	RO02	RO03
		Abbot's Wood Soudley	0.0859	0.1052	0.056	0.1361	0.1402	0.0767	0.0918	0.1045	0.1082	0.0546	0.1074	0.1665	0.1466	0.0614	0.112	0.0931	0.0304	0.1142	0.1538	0.0957	0.1291	0.127	0.0583	0.1152	0.113	0.0097	0.157	0.1069	0.0754	0.1411	0.0299	0.0245	0.2103	0.0834	0.127	0.0461	0.1121	0.227	Abbot's Wood Soudley	1
		Abenhall hedge	0.1462	0.2295	0.1246	0.2122	0.0992	0.1552	0.1562	0.1844	0.0952	0.1079	0.1165	0.2261	0.116	0.1928	0.097	0.1595	0.0929	0.1331	0.1369	0.0894	0.1146	0.1064	0.0621	0.1383	0.1694	0.0827	0.1777	0.0992	0.113	0.266	0.1311	0.1223	0.2013	0.1197	0.1806	0.088	0.1516	0.3435	Abenhall hedge	2
		Baldwyns	0.0706	0.1589	0.0871	0.223	0.147	0.0908	0.1402	0.2164	0.1256	0.1046	0.0793	0.257	0.182	0.2103	0.1255	0.1262	0.1423	0.1678	0.1508	0.1339	0.0661	0.1266	0.1044	0.1405	0.1632	0.1374	0.1514	0.1004	0.1605	0.2123	0.1356	0.1419	0.3347	0.1968	0.1953	0.0816	0.2114	0.29	Baldwyns	6
		Bertholey Park	0.1021	0.1718	0.0823	0.1855	0.1522	0.0938	0.1408	0.1683	0.0663	0.0841	0.1024	0.2268	0.1914	0.1402	0.0707	0.1299	0.0834	0.0564	0.1734	0.0919	0.1129	0.094	0.0684	0.1503	0.1494	0.1092	0.1602	0.1253	0.1589	0.2514	0.1318	0.1031	0.2437	0.1691	0.1698	0.0939	0.0986	0.3049	Bertholey Park	12
		Bigsweir	0.0957	0.122	0.0382	0.1972	0.1703	0.0892	0.1489	0.1549	0.0903	0.0343	0.1024	0.2417	0.1853	0.1474	0.0632	0.1183	0.0908	0.1032	0.1781	0.1045	0.1116	0.1286	0.0876	0.1633	0.169	0.0823	0.1321	0.1404	0.1597	0.211	0.1177	0.0866	0.253	0.1716	0.187	0.0877	0.1146	0.3224	Bigsweir	14
		Borthwood Copse	0.0297	0.1131	0.0374	0.1711	0.0848	0.0787	0.0864	0.1583	0.0891	0.0733	0.0829	0.1861	0.1615	0.1623	0.0479	0.1173	0.0797	0.1265	0.0507	0.1139	0.0365	0.0657	0.0444	0.0674	0.0498	0.0695	0.0641	0.0411	0.0713	0.1722	0.0828	0.0664	0.2839	0.1633	0.1412	0.0237	0.19	0.1713	Borthwood Copse	18
		Brampton Bryan Park	0.0376	0.1093	0.0368	0.1126	0.1148	0.0966	0.0865	0.1032	0.0802	0.0156	0.0977	0.1409	0.1168	0.0532	0.0792	0.1274	0.0195	0.0867	0.1279	0.0679	0.1005	0.0951	0.0429	0.11	0.1013	0.0164	0.1232	0.086	0.0867	0.1326	0.0427	0.0288	0.249	0.1119	0.1224	0.0374	0.1217	0.2384	Brampton Bryan Park	21
		Bryngwyn Wood A (GB Clone 17)	0.1665	0.2543	0.156	0.2049	0.159	0.1796	0.2108	0.1856	0.1644	0.1623	0.195	0.2188	0.1927	0.2334	0.1393	0.2371	0.152	0.162	0.1149	0.1818	0.1161	0.1315	0.1133	0.1314	0.1818	0.1475	0.1784	0.1075	0.1058	0.2818	0.1602	0.1471	0.3448	0.229	0.2285	0.0983	0.2891	0.2886	Bryngwyn Wood A (GB Clone 17)	24
		Canford School	0.0226	0.0779	0.0069	0.1652	0.1087	0.0762	0.1048	0.1399	0.0739	0.0538	0.0934	0.1833	0.1723	0.1359	0.0489	0.1062	0.0542	0.119	0.1121	0.0698	0.0753	0.0377	0.0091	0.1097	0.0436	0.0646	0.0529	0.0801	0.0956	0.1582	0.0652	0.0587	0.2328	0.1294	0.149	0.0404	0.1578	0.208	Canford School	30
		Cappoquin Ho	0.0932	0.1922	0.0515	0.2113	0.1741	0.1424	0.1701	0.1815	0.1506	0.1289	0.1558	0.2386	0.2224	0.1908	0.1001	0.1575	0.1304	0.1412	0.1603	0.0834	0.125	0.0683	0.0406	0.1553	0.1353	0.1102	0.1141	0.1228	0.1367	0.2373	0.1375	0.1026	0.2677	0.1864	0.2113	0.0636	0.149	0.3034	Cappoquin Ho	31
		Catsash, Wentwood	0.1384	0.2237	0.1042	0.2112	0.1667	0.1723	0.1795	0.1872	0.1383	0.1435	0.1538	0.2291	0.2069	0.1796	0.086	0.1955	0.1241	0.0943	0.1685	0.0691	0.142	0.0829	0.0444	0.1328	0.1338	0.1163	0.1611	0.1049	0.1508	0.2557	0.1224	0.1275	0.278	0.1805	0.1962	0.1011	0.1071	0.3252	Catsash, Wentwood	33
		Chalkney Wood	0.1131	0.1546	0.0658	0.1975	0.1378	0.0953	0.1422	0.1745	0.0895	0.0694	0.1068	0.2378	0.1683	0.1574	0.0647	0.1285	0.072	0.092	0.1514	0.1135	0.058	0.1296	0.0533	0.1515	0.1799	0.0791	0.159	0.1336	0.1454	0.2583	0.1352	0.0832	0.2139	0.1696	0.1848	0.0651	0.0745	0.2897	Chalkney Wood	35
		Chestnut Street, Borden	0.071	0.1743	0.0661	0.1685	0.0986	0.1241	0.1543	0.1532	0.0608	0.0623	0.1175	0.1966	0.1492	0.1787	0.0356	0.1309	0.0924	0.0981	0.1057	0.1162	0.0688	0.0727	0.0473	0.1334	0.1502	0.0863	0.0876	0.0679	0.0953	0.2349	0.1268	0.102	0.2154	0.1378	0.1807	0.0492	0.19	0.2886	Chestnut Street, Borden	38
		Chestnuts Wood	0.0915	0.1333	0.0397	0.2047	0.1485	0.0943	0.1514	0.1762	0.092	0.0637	0.0997	0.2517	0.1792	0.1791	0.0701	0.1143	0.1117	0.1049	0.1593	0.1023	0.0918	0.1136	0.0646	0.1683	0.1452	0.0974	0.1094	0.1412	0.1638	0.2075	0.1393	0.0905	0.2231	0.1817	0.1874	0.0908	0.1183	0.2828	Chestnuts Wood	39
		Chilham Castle	0.0505	0.1382	0.0312	0.1703	0.1129	0.1053	0.1248	0.1504	0.1094	0.0687	0.1135	0.1991	0.1481	0.1574	0.0731	0.1312	0.1019	0.1167	0.0994	0.0635	0.0569	0.0638	0.0377	0.1181	0.0769	0.0821	0.0101	0.0639	0.1096	0.155	0.0816	0.0546	0.2803	0.1575	0.1598	0.0551	0.1789	0.2371	Chilham Castle	40
		Clytha	0.0892	0.1637	0.0392	0.173	0.1284	0.0754	0.1256	0.1408	0.0488	0.0408	0.0755	0.2159	0.1819	0.1423	0.0166	0.1263	0.0584	0.0592	0.1225	0.0773	0.0478	0.0657	0.0112	0.139	0.1395	0.0767	0.113	0.1154	0.1324	0.2481	0.1447	0.067	0.23	0.1647	0.1711	0.0502	0.0957	0.2949	Clytha	44
		Copperas Wood	0.0821	0.1974	0.0624	0.1583	0.123	0.1165	0.1004	0.132	0.1214	0.0928	0.1349	0.17	0.2038	0.153	0.0471	0.1495	0.1023	0.1224	0.1057	0.101	0.0955	0.0505	0.0391	0.1346	0.1142	0.1044	0.0754	0.0783	0.0818	0.2289	0.1176	0.0885	0.2626	0.137	0.173	0.0555	0.2233	0.2511	Copperas Wood	50
		Cowdray Avenue	0.0381	0.1484	0.0498	0.1081	0.1015	0.0964	0.1193	0.1123	0.0537	0.0495	0.0786	0.1223	0.1674	0.1105	0.0033	0.1302	0.0563	0.0692	0.1133	0.048	0.0736	-0.014	0.0302	0.0826	0.0894	0.0854	0.0843	0.0337	0.0776	0.2033	0.0681	0.0869	0.2626	0.1277	0.136	0.0491	0.1739	0.2608	Cowdray Avenue	53
		Cowdray Park	0.1002	0.2002	0.0839	0.1673	0.0899	0.1397	0.1401	0.1451	0.0853	0.0646	0.0981	0.1762	0.1554	0.1692	0.0422	0.1644	0.0823	0.0892	0.073	0.0805	0.087	0.0188	0.0454	0.0654	0.1071	0.094	0.1312	0.0638	0.0643	0.2088	0.1121	0.1128	0.2454	0.1454	0.1893	0.0549	0.2198	0.2712	Cowdray Park	54
		Croft Park	0.0938	0.1762	0.0679	0.1854	0.1591	0.1078	0.1625	0.1656	0.0706	0.0671	0.119	0.2239	0.1964	0.1512	0.0703	0.1449	0.0688	0.0722	0.1514	0.1012	0.062	0.1007	0.0534	0.1386	0.1623	0.0942	0.1371	0.1251	0.1493	0.237	0.1528	0.0927	0.2117	0.1817	0.2113	0.04	0.1289	0.2935	Croft Park	56
		Daniel's Wood (GB Clone 36)	0.0552	0.1951	0.0795	0.1334	0.0965	0.1255	0.1398	0.1136	0.1072	0.072	0.1287	0.1446	0.116	0.1514	0.0853	0.1596	0.0912	0.1224	0.0778	0.0706	0.0702	0.0175	0.0033	0.0741	0.0681	0.0372	0.0555	-0.0005	0.0381	0.1673	0.0672	0.0281	0.2822	0.1255	0.1547	0.0308	0.2103	0.2412	Daniel's Wood (GB Clone 36)	57
		Dock Copse, Botley	0.071	0.1351	0.07	0.1504	0.1019	0.1211	0.1074	0.1294	0.0953	0.101	0.1135	0.1431	0.1439	0.1021	0.091	0.0974	0.06	0.1089	0.1136	0.0121	0.1079	0.057	0.026	0.0278	0.0142	-0.0088	0.1467	0.0497	0.0755	0.1437	0.0556	0.0259	0.1998	0.095	0.1251	0.0119	0.1082	0.2163	Dock Copse, Botley	60
		Edgehills	0.068	0.1341	0.0682	0.143	0.0949	0.1247	0.0628	0.1151	0.1254	0.1127	0.121	0.1493	0.1479	0.1137	0.097	0.1339	0.0566	0.1134	0.0955	0.0656	0.1507	0.044	0.0545	0.0674	0.0733	0.0717	0.189	0.0914	0.0653	0.1616	0.0568	0.094	0.2149	0.0876	0.1434	0.0154	0.1367	0.2019	Edgehills	63
		Edlington Wood	0.1137	0.2171	0.1268	0.1573	0.1138	0.1879	0.1369	0.1366	0.1413	0.1162	0.158	0.152	0.1497	0.1454	0.1138	0.2275	0.1114	0.1284	0.1079	0.1222	0.1568	0.0619	0.0785	0.069	0.0572	0.0678	0.1649	0.0732	0.0224	0.1952	0.0848	0.0621	0.3346	0.1632	0.1712	0.0763	0.2806	0.2188	Edlington Wood	64
		Ellwood	0.0907	0.2129	0.0902	0.1633	0.1136	0.1546	0.1788	0.1495	0.1054	0.1053	0.152	0.1768	0.1684	0.2126	0.0757	0.1868	0.135	0.1157	0.0686	0.1179	0.0986	0.0168	0.0334	0.0802	0.1018	0.1133	0.0886	0.0434	0.0443	0.231	0.1267	0.0974	0.2983	0.1664	0.1939	0.0481	0.2652	0.2618	Ellwood	65
		Felbridge avenues	0.0774	0.1609	0.0341	0.1496	0.0905	0.0947	0.1288	0.1225	0.0364	0.0409	0.0721	0.1803	0.1263	0.1361	0.0179	0.1108	0.0585	0.0387	0.0984	0.0619	0.0554	0.028	-0.0063	0.1025	0.1112	0.0644	0.0962	0.0679	0.0897	0.2074	0.1044	0.0766	0.2062	0.1219	0.1538	0.0392	0.1174	0.275	Felbridge avenues	67
		Flaxley Wood/Picks Copse	0.1034	0.2121	0.0927	0.1738	0.1082	0.1419	0.151	0.1602	0.1221	0.1085	0.1293	0.197	0.152	0.208	0.0764	0.1495	0.1313	0.1293	0.1011	0.1149	0.0771	0.0718	0.0443	0.133	0.1523	0.1167	0.1152	0.0774	0.0772	0.2415	0.1451	0.1118	0.2855	0.1602	0.1874	0.0523	0.2172	0.295	Flaxley Wood/Picks Copse	70
		Flesk Wood	0.0591	0.1589	0.0283	0.1378	0.1085	0.0933	0.1347	0.1078	0.0596	0.0404	0.1034	0.1838	0.1458	0.1668	0.0118	0.1223	0.0895	0.098	0.0897	0.093	0.0458	0.0411	0.0091	0.1328	0.1317	0.0699	0.0713	0.0783	0.0863	0.2312	0.141	0.071	0.2291	0.14	0.1827	0.0071	0.1692	0.2833	Flesk Wood	71
		Fredville	0.1486	0.1853	0.0885	0.2319	0.1806	0.1498	0.1935	0.1927	0.1539	0.0919	0.116	0.2584	0.2171	0.215	0.0581	0.1744	0.1555	0.1305	0.1855	0.1124	0.1391	0.1427	0.0891	0.163	0.1899	0.1175	0.1651	0.1278	0.1631	0.2653	0.1409	0.1372	0.2824	0.1845	0.2101	0.1382	0.1264	0.3535	Fredville	73
		Gall Pond Knoll	0.1887	0.3188	0.1889	0.2253	0.1596	0.2051	0.2518	0.1915	0.1378	0.1491	0.2027	0.2451	0.1958	0.2265	0.1709	0.2779	0.1639	0.1347	0.1289	0.2114	0.1781	0.1096	0.1627	0.1335	0.2186	0.1898	0.2496	0.1471	0.1428	0.3173	0.2336	0.1858	0.3413	0.2335	0.2736	0.1094	0.3588	0.3573	Gall Pond Knoll	76
		Garratts Farm	0.1021	0.1838	0.0615	0.1644	0.124	0.1306	0.1431	0.1341	0.0781	0.0656	0.1118	0.1923	0.1523	0.0989	0.0438	0.1602	0.0601	0.0545	0.1345	0.0504	0.0992	0.054	0.0163	0.1139	0.1303	0.0595	0.1384	0.0863	0.12	0.2279	0.0888	0.0754	0.221	0.1314	0.1475	0.0645	0.0542	0.3083	Garratts Farm	77
		Glen	0.0936	0.1749	0.0687	0.1663	0.1262	0.0965	0.1571	0.1548	0.0764	0.0754	0.1225	0.2173	0.1669	0.1941	0.057	0.1276	0.1082	0.1116	0.1083	0.1335	0.0298	0.0702	0.0501	0.1628	0.1629	0.1084	0.0881	0.114	0.1261	0.2736	0.1718	0.0794	0.2875	0.1962	0.1919	0.0645	0.2034	0.2916	Glen	80
		Godinton	0.0767	0.2054	0.078	0.2019	0.1363	0.1447	0.1604	0.1663	0.1212	0.1012	0.1458	0.237	0.2018	0.2075	0.0754	0.1724	0.1126	0.1388	0.1112	0.1	0.0691	0.0209	0.0363	0.133	0.1109	0.0956	0.0789	0.0943	0.1121	0.2403	0.1598	0.0855	0.299	0.211	0.2324	0.0553	0.2311	0.2756	Godinton	82
		Hagley Hall	0.071	0.1739	0.0709	0.1474	0.1007	0.1064	0.1006	0.1258	0.1023	0.0856	0.0841	0.1716	0.1297	0.1418	0.0636	0.1123	0.0864	0.1159	0.1121	0.0558	0.0696	0.0422	0.0229	0.108	0.1009	0.0507	0.0841	0.0334	0.0797	0.1929	0.0705	0.0613	0.2453	0.1071	0.1321	0.0551	0.1234	0.2622	Hagley Hall	87
		Halswell Park	0.1148	0.2396	0.1258	0.2326	0.1651	0.2092	0.2193	0.216	0.1451	0.1359	0.2032	0.2582	0.2299	0.2737	0.0891	0.2432	0.1926	0.1616	0.1389	0.193	0.1053	0.1204	0.1131	0.1879	0.177	0.1699	0.061	0.1049	0.1374	0.3101	0.1819	0.143	0.4153	0.2538	0.2079	0.1206	0.3337	0.3132	Halswell Park	90
		Highnam Wood	0.0538	0.1483	-0.001	0.1749	0.1118	0.1203	0.1401	0.1261	0.0861	0.0632	0.0933	0.1986	0.1602	0.1563	0.0309	0.1426	0.0966	0.0829	0.1024	0.0229	0.0591	-0.0036	-0.0671	0.1191	0.073	0.067	0.0167	0.0511	0.0698	0.1714	0.0772	0.0573	0.2649	0.1227	0.1403	0.0471	0.1256	0.2755	Highnam Wood	96
		Hockley Wood	0.0698	0.1214	0.0551	0.1335	0.0722	0.1107	0.123	0.0998	0.0849	0.0698	0.0936	0.1517	0.1444	0.133	0.0526	0.1344	0.057	0.1123	0.0729	0.068	0.0972	0.0385	0.0105	0.0748	0.0867	0.0362	0.135	0.0819	0.0361	0.1814	0.0799	0.0572	0.194	0.1046	0.1375	0.014	0.1644	0.1928	Hockley Wood	97
		Holbrook Park	0.0628	0.18	0.0615	0.1445	0.0791	0.1184	0.1264	0.1332	0.0959	0.0608	0.0802	0.1456	0.1259	0.1497	0.0205	0.1463	0.0797	0.0633	0.0629	0.0596	0.0375	0.0485	0.0107	0.0456	0.1061	0.0605	0.1125	0.0154	0.0718	0.2004	0.0955	0.0777	0.2432	0.135	0.1619	0.0212	0.1198	0.2558	Holbrook Park	98
		Holnicote House	0.1303	0.1877	0.1488	0.2151	0.1681	0.1244	0.1559	0.2083	0.1891	0.1679	0.1157	0.2173	0.2124	0.2202	0.1775	0.1558	0.149	0.1927	0.1697	0.135	0.1914	0.1664	0.1381	0.1204	0.1204	0.1696	0.1932	0.1059	0.142	0.1467	0.0944	0.1731	0.3441	0.183	0.2041	0.1288	0.2654	0.2495	Holnicote House	99
		Holt Hall	0.0443	0.1634	0.0481	0.2053	0.1173	0.1076	0.1219	0.1846	0.1328	0.066	0.0768	0.2182	0.1605	0.2054	0.0652	0.1189	0.1375	0.1398	0.1025	0.0565	0.0905	0.0546	0.0552	0.0959	0.0965	0.1	0.0781	0.0343	0.1068	0.1547	0.0972	0.1194	0.3143	0.1595	0.2029	0.0645	0.2004	0.2911	Holt Hall	100
		Hope Mansell	0.038	0.1534	0.0636	0.137	0.1009	0.0311	0.0534	0.1303	0.0379	0.0562	0.0571	0.1565	0.1486	0.1335	0.0452	0.0553	0.0539	0.0569	0.0883	0.038	0.0827	0.0063	0.0064	0.0689	0.084	0.0778	0.1067	0.0157	0.0522	0.1771	0.0694	0.0856	0.2056	0.0697	0.1571	0.015	0.138	0.2443	Hope Mansell	102
		Johnson Wood	0.0407	0.1783	0.0782	0.1521	0.0691	0.0907	0.1306	0.124	0.0558	0.073	0.096	0.1914	0.1284	0.1422	0.0609	0.1171	0.0954	0.0752	0.0859	0.074	0.0686	0.0051	0.0516	0.0826	0.1018	0.1071	0.1158	0.0356	0.0927	0.2146	0.1104	0.0991	0.2978	0.1401	0.1628	0.0482	0.2038	0.2755	Johnson Wood	109
		Kilshane	0.1663	0.2722	0.1488	0.2028	0.1537	0.2127	0.158	0.1787	0.1264	0.1396	0.1823	0.235	0.1618	0.1592	0.1575	0.2132	0.133	0.1167	0.1871	0.1367	0.176	0.1013	0.1052	0.1769	0.1269	0.1024	0.192	0.1345	0.1462	0.2654	0.1434	0.0864	0.3416	0.176	0.1603	0.1578	0.2179	0.334	Kilshane	115
		Larkey Valley L35 (GB Clone 62)	0.1493	0.1968	0.0876	0.1463	0.1454	0.1101	0.1339	0.1244	0.1054	0.0527	0.1015	0.1893	0.1274	0.1314	0.0806	0.1297	0.0825	0.1168	0.1548	0.0841	0.1153	0.1296	0.0471	0.1514	0.185	0.0501	0.1569	0.1073	0.105	0.2373	0.0939	0.0511	0.2307	0.0907	0.1357	0.0873	0.0758	0.3434	Larkey Valley L35 (GB Clone 62)	118
		Lesnes Abbey	0.0662	0.1792	0.0845	0.1779	0.0866	0.0982	0.1452	0.1747	0.0518	0.0688	0.1033	0.2248	0.1157	0.1715	0.0883	0.11	0.0894	0.1	0.1069	0.133	0.0676	0.0998	0.0684	0.1377	0.1636	0.0861	0.1274	0.0887	0.1296	0.2324	0.1465	0.1065	0.2047	0.1515	0.1719	0.0356	0.1586	0.2849	Lesnes Abbey	120
		Littledean Camp Mill Grove	0.104	0.1638	0.1012	0.1758	0.1042	0.1417	0.1483	0.1616	0.0935	0.1141	0.1241	0.1889	0.1526	0.1525	0.1162	0.1539	0.069	0.1288	0.1415	0.0779	0.1577	0.0743	0.0505	0.1138	0.0796	0.0735	0.1502	0.1094	0.0919	0.1455	0.0623	0.0868	0.1677	0.1169	0.145	0.0783	0.1727	0.218	Littledean Camp Mill Grove	123
		Lizard Wood 1 (GB Clone 67)	0.0442	0.139	0.0381	0.0672	0.0976	0.0867	0.0768	0.0881	0.0778	0.0265	0.0531	0.0945	0.1304	0.0992	0.0293	0.1188	0.058	0.1002	0.0962	0.0447	0.0878	0.0004	-0.0226	0.0994	0.1031	0.0434	0.093	0.044	0.0267	0.1542	0.0266	0.036	0.2448	0.0624	0.0744	0.0205	0.1146	0.2423	Lizard Wood 1 (GB Clone 67)	126
		Llanfihangel Crucorney	0.0539	0.1739	0.063	0.1421	0.1116	0.1107	0.1457	0.1254	0.0802	0.0771	0.1024	0.1586	0.1459	0.1594	0.0604	0.1424	0.0915	0.0769	0.0873	0.0657	0.0848	0.0129	0.0326	0.0706	0.0819	0.0945	0.0905	0.0423	0.0714	0.157	0.1053	0.0958	0.2519	0.1469	0.1914	0.0142	0.1905	0.2475	Llanfihangel Crucorney	127
		Long Plantation A (GB Clone 71)	-0.0056	0.1147	0.0018	0.1451	0.0623	0.071	0.0935	0.1061	0.0737	0.059	0.1028	0.1711	0.1142	0.1423	0.0435	0.1092	0.0722	0.0818	0.0339	0.0432	0.0413	0.0111	0.0096	0.0642	0.02	0.0538	-0.0005	0.0138	0.0441	0.1305	0.0634	0.0348	0.2651	0.1361	0.1476	-0.0018	0.1846	0.1789	Long Plantation A (Sch 305-02) (GB Clone 71)	129
		Lydney Park	0.1066	0.1764	0.06	0.2039	0.1403	0.15	0.1675	0.1802	0.1059	0.0855	0.1331	0.2277	0.1815	0.1868	0.0554	0.1634	0.1243	0.102	0.1339	0.0902	0.0627	0.089	0.0435	0.1433	0.1347	0.1001	0.0789	0.0979	0.1355	0.2397	0.1309	0.1019	0.2594	0.1847	0.1792	0.0925	0.1674	0.2845	Lydney Park	137
		Nailbridge	0.1404	0.245	0.1316	0.1847	0.0706	0.1886	0.1447	0.1653	0.0973	0.1252	0.1066	0.1669	0.1067	0.1805	0.1071	0.1887	0.0927	0.0825	0.0884	0.1053	0.1399	0.0771	0.0604	0.057	0.0539	0.0655	0.2142	0.0826	0.0639	0.1936	0.1175	0.0841	0.2675	0.1482	0.153	0.0646	0.206	0.2433	Nailbridge	146
		Nettlecombe Park	0.0923	0.2063	0.0826	0.1645	0.1018	0.116	0.1398	0.1383	0.0541	0.0756	0.0992	0.1925	0.1517	0.1935	0.064	0.1654	0.1162	0.0699	0.083	0.0921	0.0904	0.0084	0.0347	0.1092	0.0877	0.1184	0.1133	0.0878	0.057	0.2039	0.1286	0.0821	0.3163	0.1787	0.1708	0.0635	0.2621	0.2583	Nettlecombe Park	148
		Norsey Wood	0.0619	0.1755	0.0782	0.154	0.0745	0.136	0.1331	0.1438	0.0851	0.0722	0.097	0.1577	0.1284	0.1471	0.0496	0.1572	0.0568	0.0725	0.0676	0.0877	0.0759	0.0208	0.0251	0.0309	0.0875	0.0638	0.1249	0.0295	0.0506	0.2011	0.0847	0.1049	0.2301	0.1251	0.1804	0.0104	0.1737	0.234	Norsey Wood	150
		Penshurst Collinses Toll	0.0785	0.2298	0.125	0.175	0.1042	0.142	0.1833	0.1656	0.0964	0.11	0.1498	0.1955	0.1501	0.1868	0.1226	0.2005	0.1096	0.1094	0.0755	0.1531	0.1215	0.0527	0.0966	0.0717	0.1291	0.13	0.1681	0.0659	0.094	0.2206	0.1558	0.1371	0.2904	0.1939	0.2244	0.0407	0.2808	0.2593	Penshurst Collinses Toll	157
		Philip's Wood	0.0774	0.2008	0.0906	0.1472	0.1268	0.0897	0.157	0.1556	0.0967	0.0785	0.1172	0.1911	0.1635	0.2094	0.04	0.1469	0.143	0.1168	0.1075	0.116	0.0274	0.0562	0.0531	0.1385	0.1853	0.1217	0.1294	0.051	0.0997	0.2941	0.1543	0.1097	0.342	0.1809	0.1956	0.0616	0.2146	0.3324	Philip's Wood	162
		Popes Hill	0.0518	0.1461	0.0586	0.139	0.109	0.1138	0.1148	0.1207	0.1104	0.0773	0.1213	0.1442	0.1617	0.1242	0.0809	0.1145	0.0657	0.1218	0.1163	0.0835	0.1164	0.0632	0.0446	0.1022	0.0802	0.063	0.0795	0.0542	0.0751	0.1443	0.0676	0.073	0.2017	0.0962	0.1602	0.0463	0.1869	0.2275	Popes Hill	166
		Powderham A (GB Clone 94)	0.0652	0.1674	0.0567	0.1558	0.1036	0.1169	0.1463	0.1358	0.0677	0.0555	0.1075	0.1939	0.1441	0.1587	0.0535	0.1413	0.0866	0.0911	0.1072	0.0794	0.0576	0.0397	0.0348	0.1187	0.1114	0.0765	0.0805	0.085	0.103	0.1937	0.1189	0.0718	0.2273	0.1594	0.1788	0.045	0.1832	0.2597	Powderham A (GB Clone 94)	167
		Priest Wood	0.0907	0.2267	0.1251	0.1192	0.1195	0.1069	0.1716	0.1167	0.0766	0.0795	0.1236	0.1349	0.1813	0.1689	0.0632	0.185	0.1034	0.1079	0.1016	0.1655	0.081	0.052	0.0878	0.0971	0.177	0.1425	0.2029	0.0862	0.0847	0.2887	0.1761	0.1312	0.3125	0.1829	0.209	0.0297	0.2905	0.3011	Priest Wood	169
		Puttenage	0.1107	0.1847	0.0779	0.1582	0.0842	0.142	0.1313	0.1389	0.1029	0.078	0.0848	0.1611	0.1376	0.1502	0.0495	0.1843	0.0708	0.0844	0.0728	0.07	0.0787	0.0329	0.0247	0.0464	0.0963	0.0672	0.1608	0.0701	0.0402	0.1934	0.0807	0.0773	0.2406	0.1383	0.1494	0.042	0.1504	0.2261	Puttenage	171
		Ruperra	0.0865	0.1656	0.0577	0.1506	0.1026	0.0902	0.116	0.1402	0.0498	0.0487	0.0762	0.1852	0.1319	0.1043	0.0573	0.1274	0.0308	0.0401	0.1094	0.0692	0.0492	0.0613	0.0096	0.0973	0.13	0.0569	0.143	0.0893	0.1144	0.216	0.095	0.0612	0.2097	0.135	0.1356	0.0473	0.0587	0.2725	Ruperra	176
		Sculpture trail	0.1372	0.2062	0.1033	0.1831	0.1008	0.1338	0.1397	0.1502	0.1032	0.0965	0.091	0.2053	0.1626	0.176	0.0368	0.1822	0.0851	0.074	0.0881	0.0848	0.0996	0.0852	0.0497	0.0637	0.1141	0.0811	0.1752	0.0878	0.1123	0.248	0.1177	0.0988	0.2537	0.1701	0.18	0.0878	0.1132	0.2866	Sculpture trail	181
		Serridge	0.0452	0.1796	0.0695	0.1242	0.0627	0.1115	0.1245	0.0992	0.0685	0.0558	0.0742	0.1304	0.145	0.1492	0.0065	0.1577	0.0719	0.0719	0.0367	0.0395	0.0348	-0.0312	0.0037	0.0167	0.0848	0.0641	0.1312	0.0115	0.0297	0.2162	0.0984	0.0686	0.2727	0.1332	0.1658	-0.0199	0.1827	0.2505	Serridge	183
		Seven Sisters, Penshurst	0.2351	0.3185	0.2526	0.3147	0.2567	0.2379	0.2911	0.3077	0.2566	0.2703	0.2846	0.3278	0.3447	0.3341	0.248	0.2513	0.2647	0.282	0.2348	0.2946	0.2944	0.2375	0.2193	0.2423	0.281	0.2659	0.2886	0.1932	0.1813	0.3872	0.2459	0.2485	0.4014	0.2521	0.2902	0.2122	0.3852	0.4045	Seven Sisters, Penshurst	184
		Speech House	0.1139	0.2332	0.1249	0.1974	0.1014	0.1502	0.1179	0.1635	0.1506	0.1479	0.1403	0.1954	0.131	0.1859	0.1269	0.163	0.1418	0.1289	0.0921	0.0283	0.145	0.0372	0.0659	0.0652	0.0891	0.121	0.1696	0.0348	0.067	0.2051	0.1022	0.1355	0.3177	0.1343	0.1943	0.0769	0.2343	0.2921	Speech House	193
		St Pierre	0.0448	0.1382	0.0264	0.113	0.0783	0.0873	0.1318	0.109	0.0455	0.034	0.0744	0.1423	0.1105	0.133	-0.0069	0.1304	0.0654	0.0609	0.0734	0.0324	0.0382	-0.004	-0.0014	0.0905	0.0958	0.0646	0.0686	0.0542	0.0705	0.197	0.0909	0.0572	0.2363	0.1402	0.1416	0.019	0.1327	0.2565	St Pierre	194
		Staple Edge	0.1135	0.2278	0.0828	0.1451	0.0748	0.1499	0.1164	0.1203	0.1038	0.0984	0.1296	0.1627	0.1183	0.1896	0.0502	0.1851	0.1149	0.0867	0.0352	0.0596	0.063	-0.029	0.0158	0.0729	0.1045	0.1007	0.1206	0.0532	0.0371	0.2424	0.1283	0.0969	0.3073	0.1494	0.1793	0.0621	0.2309	0.2915	Staple Edge	195
		Stour Wood	0.0695	0.1853	0.0737	0.1596	0.1069	0.0471	0.0933	0.1333	0.0504	0.0693	0.0814	0.1884	0.1614	0.1368	0.0492	0.0649	0.0521	0.0559	0.0959	0.0919	0.0337	0.0448	0.0293	0.0905	0.1316	0.0838	0.1125	0.0528	0.094	0.2395	0.1246	0.0736	0.2557	0.1339	0.1698	0.0062	0.1522	0.2817	Stour Wood	198
		Sunninghill	0.1094	0.1512	0.0501	0.1646	0.1152	0.1085	0.126	0.1302	0.0747	0.0277	0.0589	0.1906	0.1281	0.1087	0.0651	0.1446	0.0506	0.078	0.1406	0.076	0.1247	0.0915	0.0346	0.1189	0.1126	0.0386	0.1481	0.1156	0.101	0.1451	0.0593	0.0577	0.1933	0.1125	0.1252	0.0798	0.1014	0.2627	Sunninghill	200
		The Hangings	0.0696	0.1412	0.0397	0.1546	0.1069	0.0936	0.1251	0.1228	0.0973	0.0439	0.1071	0.1815	0.15	0.1458	0.0413	0.1355	0.064	0.1224	0.0825	0.0717	0.0126	0.0507	0.0101	0.1138	0.1417	0.0543	0.0795	0.0755	0.0825	0.2224	0.1045	0.0478	0.2764	0.1543	0.1676	0.0284	0.1685	0.271	The Hangings	204
		The Weir	0.168	0.2074	0.127	0.2394	0.1456	0.1464	0.1626	0.2118	0.1196	0.1448	0.1178	0.2769	0.1713	0.1671	0.1365	0.1543	0.0725	0.1136	0.1932	0.1336	0.1382	0.1731	0.0781	0.1796	0.178	0.0823	0.2203	0.1719	0.1966	0.2696	0.1527	0.1067	0.2034	0.1709	0.1748	0.121	0.0017	0.3127	The Weir	205
		Tortworth Chestnut	0.1791	0.2436	0.1582	0.234	0.2013	0.167	0.2116	0.2034	0.1783	0.148	0.1929	0.2624	0.2625	0.225	0.1867	0.2267	0.1559	0.2148	0.1855	0.225	0.1934	0.1776	0.1479	0.1981	0.2262	0.1834	0.2723	0.2174	0.1551	0.2646	0.2092	0.1796	0.3157	0.2392	0.2611	0.1026	0.3423	0.2896	Tortworth Chestnut	212
		Turnips Grove	0.0631	0.1612	0.0582	0.146	0.075	0.0956	0.1295	0.129	0.0478	0.0648	0.0954	0.1919	0.0955	0.1341	0.0512	0.1058	0.0673	0.0681	0.1056	0.0546	0.0342	0.0346	0.0104	0.1255	0.1108	0.0623	0.0603	0.0498	0.0933	0.2228	0.0934	0.0559	0.2298	0.1225	0.1313	0.0489	0.1164	0.2717	Turnips Grove	216
		Upper Glen	0.0456	0.136	0.0549	0.0781	0.0713	0.0934	0.0969	0.0791	0.0551	0.0458	0.0962	0.1059	0.1219	0.1148	0.0216	0.1343	0.0667	0.0697	0.0789	0.0836	0.09	0.0097	0.0535	0.0812	0.0674	0.0857	0.104	0.0581	0.0364	0.1793	0.0745	0.0574	0.2804	0.1366	0.1272	0.04	0.2195	0.2005	Upper Glen	218
		Wardwell Wood, Newington	0.1144	0.1836	0.1059	0.2041	0.1149	0.1401	0.1463	0.1905	0.0192	0.0827	0.1092	0.2391	0.1554	0.1414	0.1045	0.1513	0.0591	0.115	0.1798	0.1485	0.1619	0.1218	0.0759	0.1776	0.1428	0.0618	0.173	0.1388	0.1452	0.2375	0.1031	0.0911	0.1688	0.1078	0.1174	0.1117	0.157	0.2994	Wardwell Wood, Newington	221
		Warley Place	0.054	0.1678	0.0475	0.1445	0.0707	0.0677	0.0878	0.1109	0.0489	0.0653	0.0463	0.1637	0.1084	0.1302	0.0302	0.0775	0.0436	0.0484	0.0687	0.0302	0.0459	-0.0136	-0.0379	0.0564	0.0867	0.0356	0.0845	0.0055	0.0315	0.203	0.0765	0.0645	0.193	0.0731	0.1386	-0.0101	0.0793	0.2663	Warley Place	222
		Welshbury	0.1069	0.1748	0.0855	0.21	0.1359	0.1289	0.1646	0.1788	0.1035	0.1172	0.139	0.2457	0.174	0.1715	0.1234	0.113	0.1095	0.1423	0.1656	0.0944	0.1226	0.1085	0.073	0.1717	0.1299	0.091	0.0971	0.119	0.1538	0.1956	0.1243	0.0946	0.1406	0.1267	0.1761	0.0849	0.1382	0.2738	Welshbury	228
		West Prawle Wood A (GB Clone 138)	0.0406	0.1473	0.0606	0.109	0.0898	0.0615	0.0993	0.1153	0.0129	0.045	0.0781	0.1394	0.1493	0.1114	0.0059	0.086	0.0365	0.0588	0.1109	0.0538	0.0361	0.0428	-0.0027	0.1087	0.1303	0.0472	0.1161	0.0626	0.0975	0.2436	0.1042	0.0574	0.187	0.1101	0.1259	-0.0032	0.0982	0.2742	West Prawle Wood A (GB Clone 138)	230
			PT01	PT02	PT03	SP01	SP02	SP03	SP04	SP05	SP06	SP07	SP08	SP09	SP10	SP11	SP12	SP13	SP14	SP15	SP16	SP17	FR01	FR02	FR03	IT01	IT02	IT03	IT04	IT05	IT06	IT07	IT08	IT09	SK02	SK03	HU01	RO01	RO02	RO03
		EurEng Group C or D	D	D	D	D	C	D	D	D	C	D	C	D	C	D	C	D	D	C	C	C	C	C	C	C	D	C	C	C	D	D	D	D	C	D	D	C	C	D
					? Why not C		? Why C					? Why not C			? Why C					? Why C	? Why C														? Why C
sites 6 SSR 283 1332		all sites 245 EngIreWal
			PT01	PT02	PT03	SP01	SP02	SP03	SP04	SP05	SP06	SP07	SP08	SP09	SP10	SP11	SP12	SP13	SP14	SP15	SP16	SP17	FR01	FR02	FR03	IT01	IT02	IT03	IT04	IT05	IT06	IT07	IT08	IT09	SK02	SK03	HU01	RO01	RO02	RO03
1		Abbot's Wood Soudley	0.0859	0.1052	0.056	0.1361	0.1402	0.0767	0.0918	0.1045	0.1082	0.0546	0.1074	0.1665	0.1466	0.0614	0.112	0.0931	0.0304	0.1142	0.1538	0.0957	0.1291	0.127	0.0583	0.1152	0.113	0.0097	0.157	0.1069	0.0754	0.1411	0.0299	0.0245	0.2103	0.0834	0.127	0.0461	0.1121	0.227	Abbot's Wood Soudley
2		Abenhall hedge	0.1462	0.2295	0.1246	0.2122	0.0992	0.1552	0.1562	0.1844	0.0952	0.1079	0.1165	0.2261	0.116	0.1928	0.097	0.1595	0.0929	0.1331	0.1369	0.0894	0.1146	0.1064	0.0621	0.1383	0.1694	0.0827	0.1777	0.0992	0.113	0.266	0.1311	0.1223	0.2013	0.1197	0.1806	0.088	0.1516	0.3435	Abenhall hedge
3		Aconbury Hill (GB Clone 01)	0.0858	0.2145	0.0758	0.1175	0.1446	0.1523	0.1527	0.1126	0.0724	0.1123	0.1224	0.1092	0.1777	0.1004	0.0363	0.2177	0.0625	0.0685	0.1461	0.0195	0.1467	-0.0037	-0.0789	0.105	0.053	0.0795	0.1866	0.0764	0.0543	0.1984	0.0544	0.0801	0.2893	0.1276	0.1273	-0.0194	0.0902	0.2739	Aconbury Hill (GB Clone 01)
4		America Wood	0.0214	0.0778	0.0368	0.0929	0.1048	0.0253	0.0742	0.0842	0.077	0.0389	0.0228	0.1015	0.1617	0.1294	0.0066	0.0652	0.0771	0.111	0.1031	0.0916	0.094	0.0378	0.0193	0.0515	0.0606	0.0584	0.1531	0.0589	0.0478	0.1019	0.0368	0.0691	0.2915	0.1303	0.1326	-0.0163	0.1768	0.1881	America Wood
5		Arrallas Drive (GB Clone 02)	0.225	0.298	0.2538	0.1989	0.2269	0.2428	0.1805	0.212	0.2059	0.2127	0.2669	0.2236	0.2502	0.1607	0.2161	0.2757	0.1396	0.2468	0.266	0.2823	0.2428	0.2451	0.2255	0.2619	0.2357	0.1479	0.2656	0.1998	0.1877	0.3527	0.1326	0.108	0.4448	0.2197	0.1563	0.2073	0.3035	0.3268	Arrallas Drive (GB Clone 02)
6		Baldwyns	0.0706	0.1589	0.0871	0.223	0.147	0.0908	0.1402	0.2164	0.1256	0.1046	0.0793	0.257	0.182	0.2103	0.1255	0.1262	0.1423	0.1678	0.1508	0.1339	0.0661	0.1266	0.1044	0.1405	0.1632	0.1374	0.1514	0.1004	0.1605	0.2123	0.1356	0.1419	0.3347	0.1968	0.1953	0.0816	0.2114	0.29	Baldwyns
7		Ballymanus	0.1631	0.2558	0.1551	0.1443	0.1595	0.1553	0.1046	0.1168	0.0767	0.1035	0.1716	0.1633	0.176	0.0206	0.1509	0.19	0.0122	0.1196	0.2062	0.1133	0.1824	0.1025	0.066	0.187	0.1306	0.0723	0.1911	0.1345	0.1279	0.2663	0.0473	0.0395	0.3301	0.087	0.0743	0.1438	0.2179	0.327	Ballymanus
8		Barham Court, Teston	0.0245	0.1749	0.0554	0.1315	0.131	0.0466	0.1026	0.1202	0.034	0.063	0.07	0.1565	0.214	0.1491	-0.0125	0.145	0.0525	0.1321	0.0854	0.1015	-0.0071	0.0119	-0.0358	0.1383	0.1414	0.0835	0.066	0.0401	0.0697	0.2746	0.1228	0.0748	0.3365	0.1568	0.1544	-0.0249	0.1842	0.273	Barham Court, Teston
9		Bedford Purlieus	-0.0316	0.0811	-0.0005	0.094	0.0781	0.0403	0.0876	0.0598	0.069	0.0499	0.0666	0.1055	0.0982	0.1233	0.0555	0.0878	0.0781	0.0867	0.0604	0.0052	0.0832	-0.0017	-0.0312	0.0379	-0.0142	0.0416	0.0321	-0.0232	0.0063	0.0156	-0.004	0.0102	0.2773	0.0766	0.1153	-0.0364	0.1461	0.1638	Bedford Purlieus
10		Benenden	0.1516	0.2481	0.1746	0.1989	0.2497	0.2037	0.1658	0.1896	0.1947	0.1814	0.2453	0.2236	0.2688	0.1212	0.2195	0.216	0.0967	0.2372	0.2705	0.1986	0.2322	0.1869	0.1162	0.2595	0.1679	0.0985	0.1262	0.1687	0.1722	0.2559	0.0747	0.0557	0.3655	0.1506	0.152	0.1412	0.224	0.3191	Benenden
11		Bergholt A (GB Clone 03)	0.1004	0.1922	0.0495	0.222	0.1667	0.1386	0.1616	0.1779	0.134	0.0914	0.134	0.2414	0.2043	0.2129	0.0527	0.1756	0.1423	0.1442	0.1432	0.0192	0.05	0.0458	0.0017	0.1487	0.1167	0.1005	0.0167	0.0832	0.1249	0.2302	0.1132	0.084	0.3279	0.1872	0.2138	0.0846	0.1961	0.3296	Bergholt A (GB Clone 03)
12		Bertholey Park	0.1021	0.1718	0.0823	0.1855	0.1522	0.0938	0.1408	0.1683	0.0663	0.0841	0.1024	0.2268	0.1914	0.1402	0.0707	0.1299	0.0834	0.0564	0.1734	0.0919	0.1129	0.094	0.0684	0.1503	0.1494	0.1092	0.1602	0.1253	0.1589	0.2514	0.1318	0.1031	0.2437	0.1691	0.1698	0.0939	0.0986	0.3049	Bertholey Park
13		Big Wood A (GB Clone 05)	0.0768	0.2001	0.0846	0.1679	0.1552	0.1184	0.1885	0.1401	0.0734	0.0843	0.1592	0.2165	0.2093	0.1921	0.0818	0.1934	0.0972	0.1299	0.1108	0.1646	0.0598	0.0616	0.0397	0.1631	0.1864	0.1259	0.1254	0.1367	0.103	0.2786	0.1872	0.0894	0.3317	0.2151	0.2212	-0.004	0.266	0.3016	Big Wood A (GB Clone 05)
14		Bigsweir	0.0957	0.122	0.0382	0.1972	0.1703	0.0892	0.1489	0.1549	0.0903	0.0343	0.1024	0.2417	0.1853	0.1474	0.0632	0.1183	0.0908	0.1032	0.1781	0.1045	0.1116	0.1286	0.0876	0.1633	0.169	0.0823	0.1321	0.1404	0.1597	0.211	0.1177	0.0866	0.253	0.1716	0.187	0.0877	0.1146	0.3224	Bigsweir
15		Black Forest	0.2115	0.3091	0.2147	0.1945	0.1959	0.2529	0.1909	0.1865	0.2154	0.1916	0.2427	0.2263	0.1933	0.1328	0.2284	0.2604	0.1488	0.221	0.2509	0.1911	0.2516	0.1888	0.1831	0.2346	0.2184	0.1218	0.2638	0.1792	0.1917	0.3084	0.1396	0.1252	0.3652	0.1668	0.1485	0.2089	0.2553	0.3815	Black Forest
16		Blakeney Walk	0.076	0.1664	0.0591	0.1453	0.0867	0.0944	0.0927	0.1152	0.0752	0.0505	0.0823	0.1385	0.12	0.1169	0.0542	0.1423	0.0304	0.1086	0.0592	0.0848	0.0966	0.0269	0.0124	0.0308	0.0723	0.0398	0.1397	0.0432	-0.0119	0.1761	0.0478	0.0543	0.2454	0.093	0.1477	-0.0096	0.211	0.2364	Blakeney Walk
17		Boconnoc A (GB Clone 09)	0.0883	0.2245	0.0812	0.1478	0.1147	0.142	0.1565	0.1254	0.0887	0.1183	0.1153	0.1619	0.1754	0.1707	0.0091	0.144	0.1227	0.0882	0.1135	0.0155	0.0452	-0.0151	-0.056	0.1039	0.0869	0.0751	0.0817	0.0159	0.0944	0.251	0.1092	0.069	0.3064	0.1311	0.1475	0.0522	0.1115	0.3321	Boconnoc A (GB Clone 09)
18		Borthwood Copse	0.0297	0.1131	0.0374	0.1711	0.0848	0.0787	0.0864	0.1583	0.0891	0.0733	0.0829	0.1861	0.1615	0.1623	0.0479	0.1173	0.0797	0.1265	0.0507	0.1139	0.0365	0.0657	0.0444	0.0674	0.0498	0.0695	0.0641	0.0411	0.0713	0.1722	0.0828	0.0664	0.2839	0.1633	0.1412	0.0237	0.19	0.1713	Borthwood Copse
19		Boxted Hall (GB Clone 11)	0.0177	0.1269	-0.0282	0.09	0.0934	0.0119	0.0664	0.0189	-0.004	0.0107	0.0228	0.1167	0.1172	0.0725	-0.0536	0.1123	-0.0273	-0.0082	0.0562	-0.0807	-0.0071	-0.0575	-0.1871	0.058	0.0355	-0.0219	0.0061	0.0106	0.0387	0.1745	0.0434	-0.0397	0.2242	0.0757	0.1039	-0.0686	-0.0683	0.271	Boxted Hall (GB Clone 11)
20		Bradley Hill	0.096	0.2768	0.1068	0.1334	0.1386	0.1103	0.0756	0.1116	0.0091	0.0848	0.1154	0.1485	0.1868	0.1549	0.0157	0.186	0.0908	0.0401	0.0831	0.051	0.119	-0.0817	-0.0085	0.117	0.1583	0.142	0.1815	0.073	0.0679	0.3193	0.1631	0.1223	0.3567	0.1171	0.1765	-0.02	0.1967	0.387	Bradley Hill
21		Brampton Bryan Park	0.0376	0.1093	0.0368	0.1126	0.1148	0.0966	0.0865	0.1032	0.0802	0.0156	0.0977	0.1409	0.1168	0.0532	0.0792	0.1274	0.0195	0.0867	0.1279	0.0679	0.1005	0.0951	0.0429	0.11	0.1013	0.0164	0.1232	0.086	0.0867	0.1326	0.0427	0.0288	0.249	0.1119	0.1224	0.0374	0.1217	0.2384	Brampton Bryan Park
22		Brampton Hill A (GB Clone 12)	0.1066	0.2417	0.1087	0.218	0.2009	0.1799	0.2242	0.2065	0.1624	0.1708	0.196	0.2485	0.2465	0.2309	0.118	0.2134	0.1799	0.1776	0.1898	0.0958	0.0919	0.0587	0.025	0.1952	0.1302	0.1506	0.0368	0.0869	0.165	0.2797	0.1513	0.1177	0.3545	0.2143	0.2219	0.1004	0.2149	0.3367	Brampton Hill A (GB Clone 12)
23		Brierley Hill	0.1012	0.2667	0.116	0.1772	0.1022	0.1791	0.1902	0.1483	0.0897	0.1233	0.1296	0.1814	0.1601	0.2164	0.0813	0.2466	0.1361	0.1086	0.0277	0.1175	0.1457	-0.024	0.0541	0.0643	0.122	0.1299	0.1644	0.0338	0.0606	0.2617	0.1581	0.1529	0.3493	0.185	0.196	0.0541	0.2697	0.3259	Brierley Hill
24		Bryngwyn Wood A (GB Clone 17)	0.1665	0.2543	0.156	0.2049	0.159	0.1796	0.2108	0.1856	0.1644	0.1623	0.195	0.2188	0.1927	0.2334	0.1393	0.2371	0.152	0.162	0.1149	0.1818	0.1161	0.1315	0.1133	0.1314	0.1818	0.1475	0.1784	0.1075	0.1058	0.2818	0.1602	0.1471	0.3448	0.229	0.2285	0.0983	0.2891	0.2886	Bryngwyn Wood A (GB Clone 17)
25		Buckland Hill, Bwlch	0.0505	0.1424	0.0792	0.1904	0.1435	0.0715	0.0628	0.1629	0.1062	0.1445	0.0958	0.1967	0.1535	0.1538	0.1523	0.12	0.1156	0.1074	0.148	0.0069	0.2072	0.0633	0.0838	0.0856	-0.0581	0.1162	0.1574	0.0858	0.1307	0.0586	0.0512	0.0713	0.377	0.1553	0.1506	0.085	0.1633	0.2249	Buckland Hill, Bwlch
26		Burnt Stump Park (GB Clone 20)	0.0602	0.2384	0.1545	0.1558	0.2064	0.061	0.2211	0.1821	0.0262	0.095	0.1683	0.1981	0.2635	0.2044	0.0827	0.2027	0.1255	0.1276	0.1786	0.2168	0.1466	0.0706	0.1121	0.2171	0.2407	0.1972	0.2213	0.1415	0.1629	0.3657	0.2298	0.1632	0.4056	0.2532	0.2536	0.0682	0.3093	0.3674	Burnt Stump Park (GB Clone 20)
27		Bus Stop Coppice (GB Clone 21)	0.0863	0.1978	0.0337	0.1659	0.081	0.0867	0.083	0.1202	0.0729	0.045	0.0548	0.1599	0.1403	0.1277	0.0208	0.1491	0.0418	0.0471	0.03	0.0831	0.0196	0.0524	-0.0358	0.0719	0.1139	0.0779	0.1465	0.0633	0.0939	0.2297	0.1116	0.0841	0.3118	0.1258	0.1413	0.0304	0.1177	0.3091	Bus Stop Coppice (GB Clone 21)
28		Bushy House	0.3043	0.3241	0.2696	0.3332	0.3381	0.3131	0.3363	0.3275	0.2965	0.2952	0.3162	0.3574	0.3578	0.2706	0.3004	0.3503	0.2277	0.2799	0.3662	0.2957	0.3363	0.3509	0.2345	0.3191	0.3345	0.2333	0.4092	0.3327	0.2986	0.3683	0.2496	0.2483	0.3521	0.3194	0.284	0.2245	0.1874	0.4032	Bushy House
29		Camolin Park	0.0307	0.1493	0.0878	0.0859	0.0991	0.0118	0.0863	0.062	0.0254	0.069	0.0525	0.0855	0.168	0.0919	0.0359	0.0678	-0.0033	0.118	0.091	0.1408	0.0718	0.0516	-0.0213	0.0538	0.0996	0.0092	0.1572	0.0106	0.0306	0.2202	0.0704	0.031	0.1847	0.0383	0.1418	-0.0794	0.1492	0.2196	Camolin Park
30		Canford School	0.0226	0.0779	0.0069	0.1652	0.1087	0.0762	0.1048	0.1399	0.0739	0.0538	0.0934	0.1833	0.1723	0.1359	0.0489	0.1062	0.0542	0.119	0.1121	0.0698	0.0753	0.0377	0.0091	0.1097	0.0436	0.0646	0.0529	0.0801	0.0956	0.1582	0.0652	0.0587	0.2328	0.1294	0.149	0.0404	0.1578	0.208	Canford School
31		Cappoquin Ho	0.0932	0.1922	0.0515	0.2113	0.1741	0.1424	0.1701	0.1815	0.1506	0.1289	0.1558	0.2386	0.2224	0.1908	0.1001	0.1575	0.1304	0.1412	0.1603	0.0834	0.125	0.0683	0.0406	0.1553	0.1353	0.1102	0.1141	0.1228	0.1367	0.2373	0.1375	0.1026	0.2677	0.1864	0.2113	0.0636	0.149	0.3034	Cappoquin Ho
32		Carburton (GB Clone 22)	0.0775	0.2213	0.0528	0.1412	0.0908	0.0943	0.0709	0.0889	0.0539	0.087	0.0774	0.1322	0.1525	0.0689	-0.0011	0.1408	0.0346	0.0162	0.0854	-0.081	0.0882	-0.0713	-0.0799	0.0582	0.0575	0.0489	0.1125	0.0107	0.0746	0.2343	0.0619	0.0535	0.2402	0.0592	0.1026	0.006	-0.012	0.3245	Carburton (GB Clone 22)
33		Catsash, Wentwood	0.1384	0.2237	0.1042	0.2112	0.1667	0.1723	0.1795	0.1872	0.1383	0.1435	0.1538	0.2291	0.2069	0.1796	0.086	0.1955	0.1241	0.0943	0.1685	0.0691	0.142	0.0829	0.0444	0.1328	0.1338	0.1163	0.1611	0.1049	0.1508	0.2557	0.1224	0.1275	0.278	0.1805	0.1962	0.1011	0.1071	0.3252	Catsash, Wentwood
34		Cefn Mabli	0.0885	0.1559	0.1323	0.1743	0.1037	0.0563	0.1326	0.1734	0.0025	0.1227	0.0645	0.2168	0.148	0.1186	0.1547	0.0747	0.0308	0.1001	0.185	0.1289	0.192	0.1281	0.0754	0.1492	0.1254	0.1002	0.2258	0.1244	0.1424	0.1792	0.0709	0.1095	0.1754	0.0723	0.0897	0.0774	0.1163	0.2566	Cefn Mabli
35		Chalkney Wood	0.1131	0.1546	0.0658	0.1975	0.1378	0.0953	0.1422	0.1745	0.0895	0.0694	0.1068	0.2378	0.1683	0.1574	0.0647	0.1285	0.072	0.092	0.1514	0.1135	0.058	0.1296	0.0533	0.1515	0.1799	0.0791	0.159	0.1336	0.1454	0.2583	0.1352	0.0832	0.2139	0.1696	0.1848	0.0651	0.0745	0.2897	Chalkney Wood
36		Champions Wood	0.117	0.2174	0.1057	0.115	0.081	0.0968	0.0583	0.0314	0.0804	0.0734	0.0548	0.1101	0.1212	0.0562	0.0469	0.1128	0.0382	0.0795	0.0854	0.005	0.1412	-0.0406	-0.0016	0.0502	0.1063	0.0367	0.1526	0.003	-0.0142	0.2433	0.0224	0.0208	0.2943	-0.0217	0.0478	0.0536	0.1177	0.3417	Champions Wood
37		Chessgrove	0.0994	0.1987	0.0528	0.1541	0.0554	0.1036	0.1456	0.111	0.0291	0.0682	0.0961	0.1747	0.0806	0.1288	0.0638	0.1276	0.057	0.0792	0.0446	0.0311	0.1044	0.0174	-0.0285	0.0797	0.0798	0.0317	0.0711	0.0398	0.0663	0.1816	0.0786	0.0365	0.0842	0.0315	0.1114	0.012	0.0891	0.2872	Chessgrove
38		Chestnut Street, Borden	0.071	0.1743	0.0661	0.1685	0.0986	0.1241	0.1543	0.1532	0.0608	0.0623	0.1175	0.1966	0.1492	0.1787	0.0356	0.1309	0.0924	0.0981	0.1057	0.1162	0.0688	0.0727	0.0473	0.1334	0.1502	0.0863	0.0876	0.0679	0.0953	0.2349	0.1268	0.102	0.2154	0.1378	0.1807	0.0492	0.19	0.2886	Chestnut Street, Borden
39		Chestnuts Wood	0.0915	0.1333	0.0397	0.2047	0.1485	0.0943	0.1514	0.1762	0.092	0.0637	0.0997	0.2517	0.1792	0.1791	0.0701	0.1143	0.1117	0.1049	0.1593	0.1023	0.0918	0.1136	0.0646	0.1683	0.1452	0.0974	0.1094	0.1412	0.1638	0.2075	0.1393	0.0905	0.2231	0.1817	0.1874	0.0908	0.1183	0.2828	Chestnuts Wood
40		Chilham Castle	0.0505	0.1382	0.0312	0.1703	0.1129	0.1053	0.1248	0.1504	0.1094	0.0687	0.1135	0.1991	0.1481	0.1574	0.0731	0.1312	0.1019	0.1167	0.0994	0.0635	0.0569	0.0638	0.0377	0.1181	0.0769	0.0821	0.0101	0.0639	0.1096	0.155	0.0816	0.0546	0.2803	0.1575	0.1598	0.0551	0.1789	0.2371	Chilham Castle
41		Clanna A (GB Clone 23)	0.0714	0.1454	0.0399	0.1855	0.1391	0.1249	0.1092	0.1438	0.1227	0.0551	0.1411	0.2138	0.1668	0.1468	0.0985	0.1653	0.0852	0.167	0.1174	0.139	0.1269	0.0834	0.053	0.1489	0.0884	0.0278	0.0644	0.1088	0.0878	0.1694	0.0852	0.0212	0.3073	0.1621	0.1556	0.0737	0.2244	0.243	Clanna A (GB Clone 23)
42		Clements End A (GB Clone 25)	0.0969	0.2262	0.1225	0.1644	0.1066	0.143	0.1329	0.1604	0.064	0.1178	0.1316	0.1488	0.1893	0.1584	0.0452	0.1535	0.0704	0.0549	0.0796	0.0929	0.0381	0.0391	0.0255	0.0101	0.086	0.0609	0.1563	0.0194	0.0702	0.2849	0.1167	0.0581	0.2963	0.1644	0.1509	-0.0018	0.1746	0.2612	Clements End A (GB Clone 25)
43		Cluny Hill (GB Clone 28)	0.1449	0.2164	0.1565	0.1074	0.172	0.1567	0.1173	0.126	0.0573	0.041	0.1574	0.1203	0.1805	0.0017	0.1077	0.2177	-0.0273	0.1156	0.2152	0.1703	0.2238	0.1438	0.1288	0.1509	0.1749	0.0467	0.2527	0.1435	0.1027	0.2654	0.0104	0.0573	0.2947	0.0919	0.0925	0.092	0.1824	0.3173	Cluny Hill (GB Clone 28)
44		Clytha	0.0892	0.1637	0.0392	0.173	0.1284	0.0754	0.1256	0.1408	0.0488	0.0408	0.0755	0.2159	0.1819	0.1423	0.0166	0.1263	0.0584	0.0592	0.1225	0.0773	0.0478	0.0657	0.0112	0.139	0.1395	0.0767	0.113	0.1154	0.1324	0.2481	0.1447	0.067	0.23	0.1647	0.1711	0.0502	0.0957	0.2949	Clytha
45		Cockington A (GB Clone 29)	0.0468	0.1988	0.0758	0.0865	0.0739	0.1322	0.1136	0.0953	0.0687	0.093	0.0753	0.0578	0.1204	0.0926	-0.0067	0.1854	0.059	0.0278	0.0451	0.0318	0.1022	-0.0403	-0.0567	-0.01	0.0509	0.0467	0.2029	-0.0152	0.0226	0.2195	0.0741	0.1001	0.3334	0.1177	0.1349	-0.0194	0.0681	0.2768	Cockington A (GB Clone 29)
46		Cockney Hill Wood (GB Clone 30)	0.1005	0.225	0.1151	0.192	0.2064	0.1869	0.1567	0.1618	0.179	0.2039	0.1775	0.1666	0.2558	0.124	0.1629	0.2516	0.0896	0.1227	0.2088	0.1104	0.2253	0.115	-0.0016	0.161	0.0946	0.114	0.1911	0.1107	0.1429	0.2026	0.0848	0.1248	0.3269	0.1568	0.1486	0.0969	0.0912	0.2641	Cockney Hill Wood (GB Clone 30)
47		Cockshoot Lodge	-0.0316	0.111	0.0411	0.1123	0.0702	0.0467	0.0527	0.0989	0.0359	0.0573	0.0769	0.1207	0.1446	0.0751	0.0387	0.0822	0.0087	0.0449	0.0679	0.0636	0.08	0.0089	0.0359	0.0375	0.0051	0.0527	0.0943	0.0228	0.0584	0.1203	0.0646	0.0558	0.2472	0.1209	0.1539	-0.0472	0.1562	0.1347	Cockshoot Lodge
48		Coed Orllwyn (GB Clone 31)	0.198	0.1896	0.1615	0.2085	0.2394	0.2124	0.1846	0.1855	0.2018	0.1002	0.2178	0.2192	0.2268	0.1349	0.1706	0.2532	0.1087	0.2569	0.2712	0.2689	0.2783	0.2527	0.186	0.2499	0.219	0.1088	0.2765	0.2293	0.1322	0.2297	0.0473	0.1146	0.4036	0.1857	0.1629	0.1828	0.3136	0.3143	Coed Orllwyn (GB Clone 31)
49		Coolnamuck	0.0289	0.1923	0.0686	0.106	0.061	0.1239	0.126	0.0905	0.0815	0.0938	0.0818	0.0805	0.1429	0.0993	0.0601	0.1831	0.0678	0.0881	0.0396	0.0482	0.1355	-0.0351	0.0319	0.0129	0.0296	0.0973	0.1425	-0.0177	0.0054	0.1243	0.0434	0.1083	0.2783	0.0817	0.1097	-0.0092	0.2402	0.2042	Coolnamuck
50		Copperas Wood	0.0821	0.1974	0.0624	0.1583	0.123	0.1165	0.1004	0.132	0.1214	0.0928	0.1349	0.17	0.2038	0.153	0.0471	0.1495	0.1023	0.1224	0.1057	0.101	0.0955	0.0505	0.0391	0.1346	0.1142	0.1044	0.0754	0.0783	0.0818	0.2289	0.1176	0.0885	0.2626	0.137	0.173	0.0555	0.2233	0.2511	Copperas Wood
51		Corbet Wood, Grinshill	0.0715	0.2033	0.0475	0.133	0.0652	0.1208	0.1326	0.1031	-0.0157	0.0481	0.0931	0.1485	0.1043	0.1496	-0.0018	0.1573	0.0712	0.0034	0.057	0.0208	0.0707	-0.0492	-0.0331	0.0613	0.0377	0.0434	0.0613	0.0319	0.0426	0.2127	0.0924	0.0229	0.262	0.119	0.1285	0.0259	0.1768	0.2908	Corbet Wood, Grinshill
52		Cotehele A (GB Clone 32)	0.1503	0.2349	0.2022	0.1607	0.2216	0.1802	0.2025	0.1924	0.1393	0.1469	0.2224	0.2047	0.2505	0.1216	0.1901	0.2295	0.1046	0.193	0.2531	0.2473	0.2045	0.1863	0.192	0.2394	0.2588	0.1652	0.2703	0.2007	0.1754	0.3401	0.1502	0.1371	0.3779	0.2121	0.169	0.1344	0.2812	0.3404	Cotehele A (GB Clone 32)
53		Cowdray Avenue	0.0381	0.1484	0.0498	0.1081	0.1015	0.0964	0.1193	0.1123	0.0537	0.0495	0.0786	0.1223	0.1674	0.1105	0.0033	0.1302	0.0563	0.0692	0.1133	0.048	0.0736	-0.014	0.0302	0.0826	0.0894	0.0854	0.0843	0.0337	0.0776	0.2033	0.0681	0.0869	0.2626	0.1277	0.136	0.0491	0.1739	0.2608	Cowdray Avenue
54		Cowdray Park	0.1002	0.2002	0.0839	0.1673	0.0899	0.1397	0.1401	0.1451	0.0853	0.0646	0.0981	0.1762	0.1554	0.1692	0.0422	0.1644	0.0823	0.0892	0.073	0.0805	0.087	0.0188	0.0454	0.0654	0.1071	0.094	0.1312	0.0638	0.0643	0.2088	0.1121	0.1128	0.2454	0.1454	0.1893	0.0549	0.2198	0.2712	Cowdray Park
55		Coxheath Wood (GB Clone 34)	0.0587	0.2018	0.0927	0.0823	-0.0173	0.0755	0.0723	0.0269	-0.1142	0.0296	0.0695	0.0489	0.1033	0.0157	-0.0066	0.1457	-0.1107	-0.0292	-0.0234	0.0699	0.1085	-0.0276	-0.0016	-0.0332	0.057	0.022	0.1611	0.0055	0.006	0.2385	0.045	0.0432	0.0808	-0.0082	0.0474	-0.0403	0.1397	0.2451	Coxheath Wood (GB Clone 34)
56		Croft Park	0.0938	0.1762	0.0679	0.1854	0.1591	0.1078	0.1625	0.1656	0.0706	0.0671	0.119	0.2239	0.1964	0.1512	0.0703	0.1449	0.0688	0.0722	0.1514	0.1012	0.062	0.1007	0.0534	0.1386	0.1623	0.0942	0.1371	0.1251	0.1493	0.237	0.1528	0.0927	0.2117	0.1817	0.2113	0.04	0.1289	0.2935	Croft Park
57		Daniel's Wood (GB Clone 36)	0.0552	0.1951	0.0795	0.1334	0.0965	0.1255	0.1398	0.1136	0.1072	0.072	0.1287	0.1446	0.116	0.1514	0.0853	0.1596	0.0912	0.1224	0.0778	0.0706	0.0702	0.0175	0.0033	0.0741	0.0681	0.0372	0.0555	-0.0005	0.0381	0.1673	0.0672	0.0281	0.2822	0.1255	0.1547	0.0308	0.2103	0.2412	Daniel's Wood (GB Clone 36)
58		Denge Wood	0.0211	0.1741	0.0195	0.0793	0.0902	-0.0156	0.0581	0.0392	-0.0401	0.0068	0.033	0.0742	0.1424	0.1004	-0.0355	0.043	0.0006	0.0041	0.0099	0.037	0.0363	-0.0752	-0.1021	-0.0123	0.0487	0.0027	0.0917	-0.0286	-0.0382	0.2067	0.0741	-0.0164	0.2451	0.056	0.1273	-0.142	0.1314	0.2622	Denge Wood
59		Dinton Park	0.1282	0.1941	0.0818	0.2	0.1486	0.1047	0.1772	0.1951	0.097	0.0601	0.1132	0.2363	0.1621	0.2126	0.0944	0.1855	0.1418	0.1289	0.1261	0.1616	0.1379	0.1458	0.1045	0.1771	0.2065	0.1396	0.2028	0.1681	0.1706	0.2775	0.1879	0.129	0.3215	0.2158	0.1972	0.106	0.2009	0.3517	Dinton Park
60		Dock Copse, Botley	0.071	0.1351	0.07	0.1504	0.1019	0.1211	0.1074	0.1294	0.0953	0.101	0.1135	0.1431	0.1439	0.1021	0.091	0.0974	0.06	0.1089	0.1136	0.0121	0.1079	0.057	0.026	0.0278	0.0142	-0.0088	0.1467	0.0497	0.0755	0.1437	0.0556	0.0259	0.1998	0.095	0.1251	0.0119	0.1082	0.2163	Dock Copse, Botley
61		Dodnash (GB Clone 37)	0.0821	0.2225	0.0596	0.1588	0.0772	0.1152	0.0965	0.1138	0.0292	0.0696	0.0924	0.1744	0.1325	0.1691	0.0032	0.1528	0.0864	0.0233	0.042	0.0494	0.0428	-0.0766	-0.0032	0.0565	0.0411	0.0806	0.105	0.0486	0.0237	0.2523	0.131	0.0526	0.3211	0.1592	0.1772	0.0133	0.2218	0.2795	Dodnash (GB Clone 37)
62		Downes A (GB Clone 38)	0.0555	0.1552	0.0685	0.1674	0.0758	0.1214	0.1102	0.1372	0.0972	0.0803	0.0898	0.187	0.0859	0.1046	0.0855	0.1021	0.045	0.1011	0.1078	0.0268	0.0954	0.0234	-0.0002	0.0796	0.0726	-0.0069	0.0862	0.0181	0.0536	0.168	0.0281	0.0325	0.21	0.0692	0.1259	0.0413	0.0567	0.2593	Downes A (GB Clone 38)
63		Edgehills	0.068	0.1341	0.0682	0.143	0.0949	0.1247	0.0628	0.1151	0.1254	0.1127	0.121	0.1493	0.1479	0.1137	0.097	0.1339	0.0566	0.1134	0.0955	0.0656	0.1507	0.044	0.0545	0.0674	0.0733	0.0717	0.189	0.0914	0.0653	0.1616	0.0568	0.094	0.2149	0.0876	0.1434	0.0154	0.1367	0.2019	Edgehills
64		Edlington Wood	0.1137	0.2171	0.1268	0.1573	0.1138	0.1879	0.1369	0.1366	0.1413	0.1162	0.158	0.152	0.1497	0.1454	0.1138	0.2275	0.1114	0.1284	0.1079	0.1222	0.1568	0.0619	0.0785	0.069	0.0572	0.0678	0.1649	0.0732	0.0224	0.1952	0.0848	0.0621	0.3346	0.1632	0.1712	0.0763	0.2806	0.2188	Edlington Wood
65		Ellwood	0.0907	0.2129	0.0902	0.1633	0.1136	0.1546	0.1788	0.1495	0.1054	0.1053	0.152	0.1768	0.1684	0.2126	0.0757	0.1868	0.135	0.1157	0.0686	0.1179	0.0986	0.0168	0.0334	0.0802	0.1018	0.1133	0.0886	0.0434	0.0443	0.231	0.1267	0.0974	0.2983	0.1664	0.1939	0.0481	0.2652	0.2618	Ellwood
66		Endsleigh House A (GB Clone 40)	0.0245	0.0979	-0.0508	0.1748	0.1426	0.0209	0.0988	0.1202	-0.0174	-0.07	0.0331	0.1984	0.1673	0.1203	-0.0668	0.1128	0.0045	0.0122	0.1124	0.0195	0.0531	0.0081	-0.0648	0.1	0.0866	0.0115	0.0116	0.0611	0.0795	0.1717	0.0378	0.008	0.2381	0.1183	0.1726	0.011	0.0393	0.3011	Endsleigh House A (GB Clone 40)
67		Felbridge avenues	0.0774	0.1609	0.0341	0.1496	0.0905	0.0947	0.1288	0.1225	0.0364	0.0409	0.0721	0.1803	0.1263	0.1361	0.0179	0.1108	0.0585	0.0387	0.0984	0.0619	0.0554	0.028	-0.0063	0.1025	0.1112	0.0644	0.0962	0.0679	0.0897	0.2074	0.1044	0.0766	0.2062	0.1219	0.1538	0.0392	0.1174	0.275	Felbridge avenues
68		Firth Wood (GB Clone 42)	0.0741	0.1545	0.028	0.1765	0.1272	0.0811	0.1098	0.126	0.0456	0.0831	0.1191	0.203	0.2023	0.1339	0.0311	0.1402	0.0233	0.0824	0.1245	0.0086	0.0363	0.0449	-0.1603	0.1427	0.0761	0.0406	0.0824	0.0915	0.0934	0.2349	0.0689	0.0058	0.2764	0.1227	0.1243	0.0254	0.0624	0.2739	Firth Wood (GB Clone 42)
69		Flaxley park	0.0852	0.1985	0.0793	0.1607	0.0593	0.1312	0.105	0.1284	0.0428	0.0854	0.0853	0.143	0.1128	0.1171	0.0453	0.1489	0.0133	0.0383	0.0581	0.0189	0.0639	0.002	-0.029	-0.0065	0.0262	0.001	0.1397	0.0108	0.0221	0.189	0.054	0.0206	0.1737	0.0707	0.1223	-0.0271	0.0901	0.2403	Flaxley park
70		Flaxley Wood/Picks Copse	0.1034	0.2121	0.0927	0.1738	0.1082	0.1419	0.151	0.1602	0.1221	0.1085	0.1293	0.197	0.152	0.208	0.0764	0.1495	0.1313	0.1293	0.1011	0.1149	0.0771	0.0718	0.0443	0.133	0.1523	0.1167	0.1152	0.0774	0.0772	0.2415	0.1451	0.1118	0.2855	0.1602	0.1874	0.0523	0.2172	0.295	Flaxley Wood/Picks Copse
71		Flesk Wood	0.0591	0.1589	0.0283	0.1378	0.1085	0.0933	0.1347	0.1078	0.0596	0.0404	0.1034	0.1838	0.1458	0.1668	0.0118	0.1223	0.0895	0.098	0.0897	0.093	0.0458	0.0411	0.0091	0.1328	0.1317	0.0699	0.0713	0.0783	0.0863	0.2312	0.141	0.071	0.2291	0.14	0.1827	0.0071	0.1692	0.2833	Flesk Wood
72		Flimwell	0.1329	0.2232	0.1956	0.1835	0.1784	0.2105	0.2107	0.1884	0.226	0.1637	0.2269	0.1731	0.2268	0.1794	0.1967	0.2805	0.1024	0.2659	0.1253	0.2669	0.2386	0.1725	0.1772	0.1126	0.2025	0.0817	0.302	0.1553	0.0986	0.2607	0.1591	0.1511	0.374	0.2342	0.2499	0.0714	0.3318	0.2362	Flimwell
73		Fredville	0.1486	0.1853	0.0885	0.2319	0.1806	0.1498	0.1935	0.1927	0.1539	0.0919	0.116	0.2584	0.2171	0.215	0.0581	0.1744	0.1555	0.1305	0.1855	0.1124	0.1391	0.1427	0.0891	0.163	0.1899	0.1175	0.1651	0.1278	0.1631	0.2653	0.1409	0.1372	0.2824	0.1845	0.2101	0.1382	0.1264	0.3535	Fredville
74		Frith Wood A (GB Clone 43)	0.0332	0.149	0.0411	0.1069	0.0684	0.0934	0.1025	0.0882	0.0969	0.0466	0.0893	0.1039	0.1304	0.0985	0.0703	0.1695	0.0435	0.1329	0.0216	0.0938	0.0925	0.0128	0.0058	0.0415	0.0607	0.0376	0.1234	0.0407	0.0107	0.141	0.0627	0.0428	0.2636	0.1144	0.1141	-0.0225	0.2289	0.1935	Frith Wood A (GB Clone 43)
75		Fyne Court	-0.013	0.1262	-0.0311	0.0823	0.0634	0.0703	0.0557	0.0269	0.0254	0.0221	0.0408	0.0573	0.1353	0.0111	-0.0236	0.1457	-0.0437	-0.0041	0.0295	-0.0634	0.0523	-0.0614	-0.1328	0.0079	-0.0088	-0.0195	0.0629	-0.0177	-0.0112	0.1013	-0.0079	-0.0119	0.1703	0.0263	0.0651	-0.103	0.0077	0.1852	Fyne Court
76		Gall Pond Knoll	0.1887	0.3188	0.1889	0.2253	0.1596	0.2051	0.2518	0.1915	0.1378	0.1491	0.2027	0.2451	0.1958	0.2265	0.1709	0.2779	0.1639	0.1347	0.1289	0.2114	0.1781	0.1096	0.1627	0.1335	0.2186	0.1898	0.2496	0.1471	0.1428	0.3173	0.2336	0.1858	0.3413	0.2335	0.2736	0.1094	0.3588	0.3573	Gall Pond Knoll
77		Garratts Farm	0.1021	0.1838	0.0615	0.1644	0.124	0.1306	0.1431	0.1341	0.0781	0.0656	0.1118	0.1923	0.1523	0.0989	0.0438	0.1602	0.0601	0.0545	0.1345	0.0504	0.0992	0.054	0.0163	0.1139	0.1303	0.0595	0.1384	0.0863	0.12	0.2279	0.0888	0.0754	0.221	0.1314	0.1475	0.0645	0.0542	0.3083	Garratts Farm
78		Gastons Copse (GB Clone 45)	0.1844	0.2952	0.1677	0.1475	0.1731	0.1949	0.2017	0.1618	0.1731	0.1665	0.1716	0.1176	0.2166	0.2423	0.1218	0.2731	0.1501	0.1474	0.1091	0.163	0.2307	0.0453	0.0829	0.0622	0.1588	0.1647	0.2553	0.094	0.0032	0.2801	0.1148	0.162	0.3958	0.1814	0.2337	0.0927	0.3167	0.332	Gastons Copse (GB Clone 45)
79		Glanmore	0.0276	0.1292	0.0167	0.1306	0.1029	0.0654	0.1246	0.0736	0.0337	0.0146	0.0844	0.1276	0.1662	0.1749	0.0044	0.121	0.0825	0.0859	0.0298	0.1159	0.0875	0.0378	-0.0714	0.06	0.0761	0.0325	0.0534	0.0081	-0.0699	0.162	0.0471	-0.0142	0.3254	0.0866	0.1023	-0.0517	0.2238	0.2376	Glanmore
80		Glen	0.0936	0.1749	0.0687	0.1663	0.1262	0.0965	0.1571	0.1548	0.0764	0.0754	0.1225	0.2173	0.1669	0.1941	0.057	0.1276	0.1082	0.1116	0.1083	0.1335	0.0298	0.0702	0.0501	0.1628	0.1629	0.1084	0.0881	0.114	0.1261	0.2736	0.1718	0.0794	0.2875	0.1962	0.1919	0.0645	0.2034	0.2916	Glen
81		Glenealy	0.1181	0.2472	0.0935	0.1454	0.0866	0.1437	0.1378	0.1027	0.0975	0.0929	0.0831	0.1159	0.1221	0.1762	0.0507	0.1842	0.0924	0.0679	0.0302	0.0109	0.0761	-0.0325	-0.02	-0.0123	0.0741	0.0923	0.155	-0.0008	0.0276	0.2102	0.0923	0.0941	0.3072	0.1188	0.1807	0.0421	0.1976	0.3142	Glenealy
82		Godinton	0.0767	0.2054	0.078	0.2019	0.1363	0.1447	0.1604	0.1663	0.1212	0.1012	0.1458	0.237	0.2018	0.2075	0.0754	0.1724	0.1126	0.1388	0.1112	0.1	0.0691	0.0209	0.0363	0.133	0.1109	0.0956	0.0789	0.0943	0.1121	0.2403	0.1598	0.0855	0.299	0.211	0.2324	0.0553	0.2311	0.2756	Godinton
83		Gordon Castle (GB Clone 46)	0.0378	0.1111	0.0081	0.1422	0.1715	0.0269	0.1347	0.0748	0.0383	-0.0177	0.074	0.1873	0.2231	0.1607	-0.0363	0.1394	0.0493	0.1236	0.1032	0.1365	0.0656	0.0234	0.018	0.152	0.1827	0.0876	0.0927	0.1351	0.0872	0.2659	0.1523	0.0655	0.3333	0.1909	0.21	-0.036	0.2159	0.3191	Gordon Castle (GB Clone 46)
84		Greybury Wood (GB Clone 48)	0.0211	0.2314	0.0833	0.1465	0.0604	0.0707	0.0767	0.1325	-0.0217	0.0729	0.0449	0.1203	0.1393	0.0887	0.0153	0.1167	-0.0525	-0.0515	0.018	-0.0451	0.0724	-0.1173	-0.11	-0.0833	-0.0163	0.0005	0.0801	-0.1269	-0.0054	0.1849	0.0044	0.0291	0.1485	0.0172	0.1408	-0.0629	-0.0052	0.247	Greybury Wood (GB Clone 48)
85		Gurteen	0.0522	0.1744	0.0992	0.1396	0.0449	0.0897	0.093	0.1239	0.0332	0.0749	0.0716	0.1408	0.1075	0.0964	0.0541	0.1218	0.0321	0.0543	0.0575	0.0812	0.0575	0.0194	0.0541	-0.0095	0.0641	0.0306	0.1764	0.0241	0.0431	0.2028	0.0913	0.0603	0.1975	0.0933	0.1531	-0.0283	0.155	0.2083	Gurteen
86		Hadleigh Great Wood	0.1303	0.2038	0.1917	0.2295	0.1965	0.1235	0.143	0.1941	0.1819	0.231	0.1656	0.2362	0.2464	0.2166	0.2246	0.1491	0.153	0.2059	0.2266	0.1759	0.2806	0.1909	0.1201	0.1578	0.0926	0.1678	0.26	0.1345	0.1213	0.1226	0.0263	0.1463	0.3796	0.1475	0.1713	0.1287	0.2452	0.2164	Hadleigh Great Wood
87		Hagley Hall	0.071	0.1739	0.0709	0.1474	0.1007	0.1064	0.1006	0.1258	0.1023	0.0856	0.0841	0.1716	0.1297	0.1418	0.0636	0.1123	0.0864	0.1159	0.1121	0.0558	0.0696	0.0422	0.0229	0.108	0.1009	0.0507	0.0841	0.0334	0.0797	0.1929	0.0705	0.0613	0.2453	0.1071	0.1321	0.0551	0.1234	0.2622	Hagley Hall
88		Hall A (GB Clone 49)	0.0642	0.1495	0.0156	0.1779	0.1409	0.1372	0.1688	0.1354	0.1138	0.0484	0.1165	0.1931	0.1642	0.1771	0.0416	0.2001	0.1027	0.1111	0.0963	0.0469	0.0973	0.0139	-0.0084	0.0948	0.0764	0.0614	0.0528	0.0825	0.0672	0.1653	0.0968	0.0711	0.2989	0.18	0.2069	0.0407	0.2031	0.27	Hall A (GB Clone 49)
89		Halnaker Park	0.0548	0.1535	0.0317	0.1325	0.0983	0.0833	0.1168	0.0971	0.0343	0.0296	0.0704	0.1674	0.1523	0.1237	-0.0311	0.0894	0.0441	0.0944	0.0995	0.0535	0.0469	-0.005	0.0038	0.1169	0.1415	0.0525	0.0963	0.0681	0.077	0.2435	0.1096	0.0706	0.2056	0.1	0.1599	-0.0226	0.0973	0.3187	Halnaker Park
90		Halswell Park	0.1148	0.2396	0.1258	0.2326	0.1651	0.2092	0.2193	0.216	0.1451	0.1359	0.2032	0.2582	0.2299	0.2737	0.0891	0.2432	0.1926	0.1616	0.1389	0.193	0.1053	0.1204	0.1131	0.1879	0.177	0.1699	0.061	0.1049	0.1374	0.3101	0.1819	0.143	0.4153	0.2538	0.2079	0.1206	0.3337	0.3132	Halswell Park
91		Harrow Hill	0.0375	0.2505	0.0813	0.115	0.0138	0.0993	0.114	0.0591	-0.0084	0.0522	0.0738	0.0948	0.0841	0.1165	0.01	0.1881	0.016	0	-0.0837	-0.0118	0.0806	-0.2501	-0.0429	-0.0733	0.0127	0.0646	0.0829	-0.0744	-0.0415	0.2123	0.0814	0.0575	0.2834	0.0924	0.153	-0.0356	0.2376	0.2759	Harrow Hill
92		Hawker's Grove (GB Clone 51)	0.1075	0.1183	0.0836	0.1804	0.1389	0.0949	0.1589	0.1498	0.1515	0.0886	0.1401	0.1947	0.1926	0.1341	0.1292	0.1717	0.0572	0.1622	0.1175	0.1756	0.173	0.189	0.1366	0.1107	0.1499	0.1007	0.2208	0.1534	0.1449	0.1471	0.0964	0.1262	0.2208	0.1803	0.2049	0.066	0.2008	0.1772	Hawker's Grove (GB Clone 51)
93		Hermitage B (GB Clone 53)	0.0663	0.214	0.1055	0.121	0.0275	0.1365	0.0804	0.0905	0.0887	0.0889	0.1257	0.1276	0.1048	0.1145	0.0649	0.1766	0.0795	0.0948	0.0103	0.0695	0.0903	-0.0228	0.0227	0.0161	0.0778	0.0589	0.1456	-0.0007	-0.0017	0.232	0.0743	0.0624	0.2996	0.0776	0.0936	0.0108	0.2213	0.2494	Hermitage B (GB Clone 53)
94		Heveningham church	0.0211	0.1148	-0.0008	0.1402	0.1212	0.1134	0.0706	0.1126	0.087	-0.0385	0.0826	0.124	0.1604	0.1004	0.0044	0.1741	0.027	0.0993	0.0848	0.1041	0.1335	0.0485	0.0299	0.0678	0.0678	0.0136	0.073	0.0585	0.0144	0.1339	-0.0184	0.027	0.335	0.1177	0.1393	0.0301	0.2277	0.2592	Heveningham church
95		High Wood	0.0436	0.1783	0.063	0.1736	0.1389	0.1367	0.1493	0.1484	0.1149	0.0831	0.0898	0.1686	0.1888	0.1583	0.0464	0.2019	0.0759	0.1188	0.1307	-0.0175	0.1093	-0.0445	-0.0567	0.0736	0.015	0.0447	0.0224	-0.0021	0.0439	0.1241	-0.0248	0.0454	0.3	0.1325	0.1539	0.0441	0.1363	0.2246	High Wood
96		Highnam Wood	0.0538	0.1483	-0.001	0.1749	0.1118	0.1203	0.1401	0.1261	0.0861	0.0632	0.0933	0.1986	0.1602	0.1563	0.0309	0.1426	0.0966	0.0829	0.1024	0.0229	0.0591	-0.0036	-0.0671	0.1191	0.073	0.067	0.0167	0.0511	0.0698	0.1714	0.0772	0.0573	0.2649	0.1227	0.1403	0.0471	0.1256	0.2755	Highnam Wood
97		Hockley Wood	0.0698	0.1214	0.0551	0.1335	0.0722	0.1107	0.123	0.0998	0.0849	0.0698	0.0936	0.1517	0.1444	0.133	0.0526	0.1344	0.057	0.1123	0.0729	0.068	0.0972	0.0385	0.0105	0.0748	0.0867	0.0362	0.135	0.0819	0.0361	0.1814	0.0799	0.0572	0.194	0.1046	0.1375	0.014	0.1644	0.1928	Hockley Wood
98		Holbrook Park	0.0628	0.18	0.0615	0.1445	0.0791	0.1184	0.1264	0.1332	0.0959	0.0608	0.0802	0.1456	0.1259	0.1497	0.0205	0.1463	0.0797	0.0633	0.0629	0.0596	0.0375	0.0485	0.0107	0.0456	0.1061	0.0605	0.1125	0.0154	0.0718	0.2004	0.0955	0.0777	0.2432	0.135	0.1619	0.0212	0.1198	0.2558	Holbrook Park
99		Holnicote House	0.1303	0.1877	0.1488	0.2151	0.1681	0.1244	0.1559	0.2083	0.1891	0.1679	0.1157	0.2173	0.2124	0.2202	0.1775	0.1558	0.149	0.1927	0.1697	0.135	0.1914	0.1664	0.1381	0.1204	0.1204	0.1696	0.1932	0.1059	0.142	0.1467	0.0944	0.1731	0.3441	0.183	0.2041	0.1288	0.2654	0.2495	Holnicote House
100		Holt Hall	0.0443	0.1634	0.0481	0.2053	0.1173	0.1076	0.1219	0.1846	0.1328	0.066	0.0768	0.2182	0.1605	0.2054	0.0652	0.1189	0.1375	0.1398	0.1025	0.0565	0.0905	0.0546	0.0552	0.0959	0.0965	0.1	0.0781	0.0343	0.1068	0.1547	0.0972	0.1194	0.3143	0.1595	0.2029	0.0645	0.2004	0.2911	Holt Hall
101		Homers Down Plantation A (GB Clone 54)	0.081	0.1991	0.0649	0.2069	0.1836	0.1547	0.2131	0.1978	0.1117	0.0892	0.1658	0.2487	0.2279	0.2594	0.0588	0.2205	0.1956	0.17	0.1604	0.1557	0.1291	0.0519	0.0539	0.211	0.1568	0.1631	0.0513	0.118	0.1349	0.2745	0.1658	0.1353	0.4049	0.2372	0.2182	0.1361	0.3138	0.3523	Homers Down Plantation A (GB Clone 54)
102		Hope Mansell	0.038	0.1534	0.0636	0.137	0.1009	0.0311	0.0534	0.1303	0.0379	0.0562	0.0571	0.1565	0.1486	0.1335	0.0452	0.0553	0.0539	0.0569	0.0883	0.038	0.0827	0.0063	0.0064	0.0689	0.084	0.0778	0.1067	0.0157	0.0522	0.1771	0.0694	0.0856	0.2056	0.0697	0.1571	0.015	0.138	0.2443	Hope Mansell
103		Hope Wood	0.1389	0.2604	0.1385	0.1547	0.1521	0.1427	0.1624	0.1536	0.1097	0.1591	0.1981	0.1841	0.194	0.2384	0.0867	0.2281	0.1425	0.1631	0.1388	0.1556	0.1286	0.0598	0.005	0.2037	0.1594	0.1653	0.1197	0.1292	0.0799	0.3133	0.1625	0.1045	0.4227	0.2117	0.1894	0.114	0.3131	0.3464	Hope Wood
104		Hopleys Wood (GB Clone 56)	0.1363	0.228	0.0637	0.2071	0.1288	0.1288	0.1311	0.1809	0.0735	0.0379	0.0472	0.1998	0.1655	0.1807	-0.0011	0.1889	0.0668	0.0659	0.0929	0.0389	0.111	0.0598	-0.0152	0.0761	0.1311	0.0894	0.1974	0.0771	0.1174	0.253	0.1004	0.1167	0.3268	0.1459	0.1814	0.0808	0.0922	0.376	Hopleys Wood (GB Clone 56)
105		Howletts	0.0616	0.1878	0.0327	0.2041	0.1334	0.1172	0.1028	0.1669	0.0599	0.0722	0.113	0.2282	0.2093	0.1707	0.0122	0.1391	0.0806	0.0674	0.1157	0.053	0.0538	0.0021	-0.0197	0.1259	0.0403	0.0666	0.0326	0.0853	0.1111	0.2324	0.1307	0.0408	0.2862	0.1793	0.1939	0.0409	0.1548	0.2703	Howletts
106		Inch Wood	0.1352	0.1991	0.1058	0.2162	0.1752	0.1351	0.1219	0.1906	0.1101	0.1151	0.122	0.2358	0.1923	0.132	0.109	0.1366	0.086	0.0864	0.2169	0.0805	0.1706	0.1069	0.0632	0.1576	0.1393	0.0983	0.2001	0.1286	0.1626	0.23	0.0759	0.1121	0.2976	0.1468	0.1654	0.1327	0.0591	0.3418	Inch Wood
107		Island Wood	0.1566	0.2918	0.1227	0.1225	0.0326	0.1648	0.1505	0.0107	0.0621	0.1009	0.12	0.1033	0.0439	0.1872	0.0575	0.2558	0.1247	0.0243	-0.0464	0.077	0.1682	-0.0282	0.0369	0.0339	0.0578	0.1039	0.1901	0.0403	-0.0449	0.2259	0.1326	0.0674	0.3784	0.1363	0.1535	0.0495	0.2969	0.2809	Island Wood
108		Issac Newton (GB Clone 59)	0.0076	0.1019	0.0109	0.1392	0.0634	0.0597	0.0682	0.0946	0.0374	0.0067	0.0447	0.1158	0.1291	0.0879	-0.0352	0.0937	-0.0395	0.0427	0.0018	0.0104	0.0361	-0.0442	-0.0632	-0.0752	0.0397	-0.0598	0.1137	-0.0339	-0.0112	0.172	-0.012	-0.0164	0.2032	0.078	0.113	-0.0736	0.0013	0.2262	Issac Newton (GB Clone 59)
109		Johnson Wood	0.0407	0.1783	0.0782	0.1521	0.0691	0.0907	0.1306	0.124	0.0558	0.073	0.096	0.1914	0.1284	0.1422	0.0609	0.1171	0.0954	0.0752	0.0859	0.074	0.0686	0.0051	0.0516	0.0826	0.1018	0.1071	0.1158	0.0356	0.0927	0.2146	0.1104	0.0991	0.2978	0.1401	0.1628	0.0482	0.2038	0.2755	Johnson Wood
110		Kateshill Ho, Bewdley	0.0755	0.2136	0.1044	0.1589	0.1962	0.1524	0.2137	0.1419	0.1538	0.1272	0.1888	0.2104	0.2881	0.2197	0.0681	0.2374	0.1605	0.2213	0.1641	0.1718	0.1565	0.0974	0.0616	0.2185	0.1946	0.1811	0.1796	0.1747	0.169	0.318	0.2083	0.1585	0.4133	0.2551	0.241	0.0592	0.2825	0.3605	Kateshill Ho, Bewdley
111		Kentchurch Park	0.1005	0.153	0.0607	0.2218	0.1129	0.1091	0.1007	0.1618	0.0804	0.1162	0.1344	0.2418	0.1615	0.1762	0.0905	0.1106	0.0382	0.1533	0.1024	0.1498	0.1172	0.0864	0.0241	0.1688	0.0639	0.0367	0.1081	0.146	0.1213	0.2327	0.1398	0.0313	0.274	0.1614	0.1835	0.0352	0.1708	0.2426	Kentchurch Park
112		Kilndown Wood	0.0961	0.2222	0.1183	0.0708	0.0705	0.1181	0.0776	0.0762	0.0382	0.0469	0.0715	0.0796	0.0733	0.0653	0.078	0.1825	0.0127	0.0108	0.0822	0.0986	0.1312	0.0612	0.0336	0.0587	0.106	0.0458	0.2053	0.0548	0.0312	0.1913	0.0584	0.0298	0.3034	0.1023	0.0838	0.0386	0.168	0.2515	Kilndown Wood
113		Kilnwood Copse, Horsham	0.2298	0.2751	0.191	0.2587	0.2548	0.2157	0.259	0.2278	0.224	0.2124	0.2301	0.2909	0.2983	0.2776	0.1492	0.2691	0.2143	0.2409	0.2447	0.1742	0.153	0.21	0.122	0.2609	0.2644	0.2102	0.2133	0.2067	0.2077	0.3677	0.2265	0.2011	0.4134	0.2836	0.2743	0.1807	0.2957	0.3872	Kilnwood Copse, Horsham
114		Kilsham Copse (GB Clone 60)	0.0775	0.2434	0.0912	0.1598	0.0843	0.1553	0.1065	0.103	0.0767	0.1131	0.0901	0.1063	0.1731	0.1456	0.0314	0.2009	0.0928	0.0725	0.0261	0.0159	0.1029	-0.0492	-0.0429	-0.0032	0.0554	0.0509	0.1626	-0.0426	-0.0054	0.2649	0.1034	0.0915	0.3535	0.0924	0.1026	-0.0092	0.2219	0.2984	Kilsham Copse (GB Clone 60)
115		Kilshane	0.1663	0.2722	0.1488	0.2028	0.1537	0.2127	0.158	0.1787	0.1264	0.1396	0.1823	0.235	0.1618	0.1592	0.1575	0.2132	0.133	0.1167	0.1871	0.1367	0.176	0.1013	0.1052	0.1769	0.1269	0.1024	0.192	0.1345	0.1462	0.2654	0.1434	0.0864	0.3416	0.176	0.1603	0.1578	0.2179	0.334	Kilshane
116		L Edney Wood, Writtle Park	0.0495	0.086	0.049	0.1822	0.1261	0.0181	0.0922	0.1501	0.0457	0.0457	0.0863	0.2026	0.1778	0.1012	0.0601	0.0562	0.0417	0.0656	0.1574	0.115	0.1238	0.1246	0.0782	0.1169	0.1205	0.0733	0.1662	0.108	0.1248	0.1948	0.06	0.0776	0.208	0.1267	0.135	0.0621	0.1159	0.2323	L Edney Wood, Writtle Park
117		Lake Plantation (GB Clone 61)	0.1163	0.1948	0.0472	0.1557	0.0805	0.1061	0.1098	0.1092	0.1012	0.059	0.0585	0.1382	0.1393	0.1267	0.0514	0.1798	0.027	0.0577	0.0375	0.0765	0.1093	0.0231	-0.0353	0.023	0.102	0.0795	0.2099	0.0872	0.0517	0.2067	0.0741	0.0929	0.307	0.1251	0.1467	0.0486	0.1646	0.288	Lake Plantation (GB Clone 61)
118		Larkey Valley L35 (GB Clone 62)	0.1493	0.1968	0.0876	0.1463	0.1454	0.1101	0.1339	0.1244	0.1054	0.0527	0.1015	0.1893	0.1274	0.1314	0.0806	0.1297	0.0825	0.1168	0.1548	0.0841	0.1153	0.1296	0.0471	0.1514	0.185	0.0501	0.1569	0.1073	0.105	0.2373	0.0939	0.0511	0.2307	0.0907	0.1357	0.0873	0.0758	0.3434	Larkey Valley L35 (GB Clone 62)
119		Leeds 1 (GB Clone 65)	0.1424	0.258	0.1332	0.2031	0.1397	0.2225	0.1727	0.1767	0.1447	0.1467	0.1615	0.1825	0.1942	0.1633	0.1261	0.2543	0.1004	0.1257	0.126	0.0384	0.2138	-0.0067	0.0663	0.054	0.0543	0.0999	0.2003	0.0955	0.0647	0.1989	0.0713	0.1039	0.3043	0.1636	0.1808	0.1003	0.2393	0.2843	Leeds 1 (GB Clone 65)
120		Lesnes Abbey	0.0662	0.1792	0.0845	0.1779	0.0866	0.0982	0.1452	0.1747	0.0518	0.0688	0.1033	0.2248	0.1157	0.1715	0.0883	0.11	0.0894	0.1	0.1069	0.133	0.0676	0.0998	0.0684	0.1377	0.1636	0.0861	0.1274	0.0887	0.1296	0.2324	0.1465	0.1065	0.2047	0.1515	0.1719	0.0356	0.1586	0.2849	Lesnes Abbey
121		Little Drybrook	0.1033	0.2592	0.1697	0.1443	0.119	0.1531	0.183	0.11	0.084	0.1224	0.1128	0.1286	0.1644	0.1826	0.0812	0.2563	0.0863	0.083	0.064	0.1104	0.1701	-0.0449	0.0425	-0.0124	0.1024	0.1017	0.2362	0.0305	-0.0172	0.276	0.1367	0.1381	0.3782	0.1748	0.2254	0.0159	0.3073	0.2817	Little Drybrook
122		Little Staple Edge	0.054	0.285	0.1256	0.2166	0.1356	0.1887	0.158	0.1821	0.1344	0.1601	0.1545	0.2012	0.2088	0.2285	0.0827	0.2256	0.1492	0.1402	0.0866	-0.0197	0.0373	-0.0863	-0.044	0.0764	0.0515	0.1096	0.0173	-0.0346	0.0803	0.2655	0.1377	0.0959	0.4004	0.1766	0.2255	0.0162	0.2535	0.3341	Little Staple Edge
123		Littledean Camp Mill Grove	0.104	0.1638	0.1012	0.1758	0.1042	0.1417	0.1483	0.1616	0.0935	0.1141	0.1241	0.1889	0.1526	0.1525	0.1162	0.1539	0.069	0.1288	0.1415	0.0779	0.1577	0.0743	0.0505	0.1138	0.0796	0.0735	0.1502	0.1094	0.0919	0.1455	0.0623	0.0868	0.1677	0.1169	0.145	0.0783	0.1727	0.218	Littledean Camp Mill Grove
124		Littledean Hall	0.0961	0.1243	0.0627	0.2198	0.1376	0.0857	0.0889	0.173	0.0932	0.1045	0.0931	0.2353	0.1754	0.0924	0.0985	0.0869	0.0632	0.0716	0.1805	0.0374	0.1252	0.1106	0.0559	0.1176	0.0658	0.0738	0.1665	0.1108	0.1515	0.164	0.0576	0.0762	0.2326	0.1265	0.1584	0.1033	0.0156	0.2629	Littledean Hall
125		Littledean Hall farm	0.0836	0.1723	0.0551	0.1819	0.1511	0.0331	0.1104	0.1571	-0.0123	0.0521	0.0888	0.2277	0.1928	0.1315	0.0517	0.0988	0.0241	0.0015	0.1447	0.0842	0.0573	0.062	-0.0054	0.1507	0.1317	0.0825	0.1388	0.1282	0.1381	0.2631	0.1451	0.0542	0.2413	0.1726	0.1868	0.0453	0.0899	0.2913	Littledean Hall farm
126		Lizard Wood 1 (GB Clone 67)	0.0442	0.139	0.0381	0.0672	0.0976	0.0867	0.0768	0.0881	0.0778	0.0265	0.0531	0.0945	0.1304	0.0992	0.0293	0.1188	0.058	0.1002	0.0962	0.0447	0.0878	0.0004	-0.0226	0.0994	0.1031	0.0434	0.093	0.044	0.0267	0.1542	0.0266	0.036	0.2448	0.0624	0.0744	0.0205	0.1146	0.2423	Lizard Wood 1 (GB Clone 67)
127		Llanfihangel Crucorney	0.0539	0.1739	0.063	0.1421	0.1116	0.1107	0.1457	0.1254	0.0802	0.0771	0.1024	0.1586	0.1459	0.1594	0.0604	0.1424	0.0915	0.0769	0.0873	0.0657	0.0848	0.0129	0.0326	0.0706	0.0819	0.0945	0.0905	0.0423	0.0714	0.157	0.1053	0.0958	0.2519	0.1469	0.1914	0.0142	0.1905	0.2475	Llanfihangel Crucorney
128		Lodge Wood (GB Clone 70)	0.1027	0.224	0.1099	0.1434	0.1122	0.1037	0.1003	0.1058	0.0942	0.0996	0.0808	0.113	0.1888	0.1716	0.0363	0.1836	0.0759	0.1282	0.0525	0.0797	0.0446	0.0003	0.0112	0.0377	0.0902	0.0978	0.1438	0.0181	-0.026	0.2288	0.0724	0.0764	0.3594	0.1202	0.1539	-0.0194	0.2576	0.2739	Lodge Wood (GB Clone 70)
129		Long Plantation A (Sch 305-02) (GB Clone 71)	-0.0056	0.1147	0.0018	0.1451	0.0623	0.071	0.0935	0.1061	0.0737	0.059	0.1028	0.1711	0.1142	0.1423	0.0435	0.1092	0.0722	0.0818	0.0339	0.0432	0.0413	0.0111	0.0096	0.0642	0.02	0.0538	-0.0005	0.0138	0.0441	0.1305	0.0634	0.0348	0.2651	0.1361	0.1476	-0.0018	0.1846	0.1789	Long Plantation A (Sch 305-02) (GB Clone 71)
130		Longhope	0.1541	0.2689	0.111	0.1904	0.0783	0.1241	0.1364	0.1567	0.0342	0.0634	0.0551	0.1904	0.0739	0.184	0.0723	0.1982	0.0668	0.0801	0.0533	0.0013	0.1001	0.042	-0.0152	0.078	0.1384	0.0706	0.1845	0.0726	0.099	0.2516	0.1326	0.0955	0.2638	0.1087	0.1663	0.0587	0.149	0.3738	Longhope
131		Longleat (GB Clone 74)	0.0707	0.2018	0.0975	0.1392	0.021	0.1269	0.1168	0.0981	0.0682	0.0989	0.0912	0.1266	0.0353	0.1503	0.1067	0.1865	0.0377	0.1052	0.0018	0.0978	0.1647	0.0003	0.0111	0.0165	-0.0312	0.0005	0.1512	0.0326	-0.0319	0.0908	0.0542	0.0122	0.2579	0.1044	0.1359	-0.0403	0.2333	0.1107	Longleat (GB Clone 74)
132		Lorden Copse	0.075	0.2706	0.1516	0.1422	0.0783	0.1194	0.0933	0.1473	0.0464	0.0669	0.0832	0.1543	0.1055	0.1136	0.096	0.1737	0.0421	0.0801	0.0717	0.1093	0.0576	0.0197	0.0491	0.0484	0.1525	0.059	0.1956	0.0031	0.07	0.2743	0.1004	0.0518	0.3536	0.1113	0.1403	0.0111	0.186	0.3392	Lorden Copse
133		Lullingstone woods	0.073	0.119	0.0474	0.2007	0.1551	0.089	0.147	0.159	0.1304	0.0515	0.0815	0.2273	0.202	0.1851	0.011	0.1287	0.1195	0.13	0.1549	0.0858	0.0802	0.0777	0.0408	0.132	0.165	0.088	0.1137	0.0911	0.1315	0.2485	0.1027	0.0998	0.3151	0.1714	0.1905	0.0803	0.1126	0.3258	Lullingstone woods
134		Luton Hoo	0.0293	0.156	0.0366	0.1505	0.1259	0.1002	0.1344	0.1202	0.0996	0.0571	0.1164	0.1816	0.1921	0.1599	0.012	0.141	0.0609	0.1251	0.1093	0.0902	0.0262	0.045	-0.0331	0.1267	0.108	0.0474	0.0638	0.0578	0.0878	0.2063	0.1164	0.0623	0.2706	0.1721	0.2131	0.0087	0.1588	0.2561	Luton Hoo
135		Luxon Wood (GB Clone 75)	0.077	0.1698	0.0525	0.1465	0.1152	0.1012	0.1079	0.0846	0.0687	0.041	0.004	0.124	0.1604	0.1267	-0.0123	0.176	0.0233	0.0541	0.095	-0.0851	0.1369	-0.0707	-0.0714	0.0057	0.0196	0.0221	0.1229	0.0081	0.0032	0.1319	-0.0227	0.0434	0.2727	0.0757	0.1243	0.0206	0.0793	0.2739	Luxon Wood (GB Clone 75)
136		Lydney Meend	0.0946	0.1873	0.0508	0.1765	0.1345	0.1541	0.1399	0.153	0.1275	0.1044	0.1368	0.1828	0.2024	0.1431	0.0537	0.1942	0.0918	0.1057	0.1346	0.0617	0.0931	0.065	0.0237	0.12	0.0802	0.0784	0.0727	0.0876	0.1065	0.2023	0.079	0.0569	0.2512	0.1455	0.1509	0.0697	0.1445	0.2455	Lydney Meend
137		Lydney Park	0.1066	0.1764	0.06	0.2039	0.1403	0.15	0.1675	0.1802	0.1059	0.0855	0.1331	0.2277	0.1815	0.1868	0.0554	0.1634	0.1243	0.102	0.1339	0.0902	0.0627	0.089	0.0435	0.1433	0.1347	0.1001	0.0789	0.0979	0.1355	0.2397	0.1309	0.1019	0.2594	0.1847	0.1792	0.0925	0.1674	0.2845	Lydney Park
138		Margam	0.0811	0.1049	0.073	0.2343	0.2201	0.0295	0.1317	0.2003	0.1366	0.104	0.1172	0.2826	0.2633	0.1686	0.1268	0.0571	0.0769	0.1829	0.2275	0.1506	0.1318	0.1696	0.0917	0.2001	0.179	0.0921	0.1543	0.1747	0.1952	0.2061	0.1235	0.0967	0.2166	0.1932	0.2332	0.0614	0.0848	0.2622	Margam
139		Marsh Lane	0.0335	0.1399	0.0326	0.1545	0.1233	0.0863	0.128	0.128	0.0415	0.0057	0.082	0.1638	0.2067	0.1641	-0.0259	0.1465	0.0659	0.0915	0.0863	0.121	0.0619	-0.0035	0.0245	0.0984	0.087	0.0837	0.099	0.084	0.046	0.2092	0.1132	0.0768	0.3049	0.1767	0.2035	0.01	0.2553	0.2312	Marsh Lane
140		Martlesham Plantation (GB Clone 76)	-0.0616	0.1663	-0.0128	0.0799	0.0608	0.012	0.0729	0.0434	-0.0547	-0.0134	0.0371	0.1063	0.1114	0.1051	-0.0542	0.1083	0.0045	0.0082	-0.0237	-0.0062	-0.1023	-0.159	-0.128	0.0188	0.0423	0.0158	-0.0403	-0.0511	0.0032	0.2026	0.095	-0.0304	0.2889	0.1029	0.1472	-0.1706	0.1378	0.2671	Martlesham Plantation (GB Clone 76)
141		Mereworth	0.2023	0.2176	0.1502	0.2166	0.2489	0.1988	0.1796	0.2079	0.2016	0.0916	0.2138	0.2478	0.2517	0.1479	0.1963	0.2456	0.1069	0.2621	0.2514	0.2831	0.2547	0.2706	0.1807	0.2701	0.2704	0.1252	0.3043	0.2733	0.2162	0.2861	0.1587	0.1258	0.4017	0.2248	0.1953	0.1681	0.2719	0.3806	Mereworth
142		Mill Hill	0.1525	0.2198	0.1544	0.2058	0.206	0.1575	0.2246	0.2251	0.1533	0.1679	0.205	0.2167	0.249	0.1803	0.1647	0.221	0.0985	0.1457	0.1997	0.1527	0.2033	0.1588	0.0817	0.1405	0.1673	0.1186	0.2454	0.1492	0.1609	0.2669	0.1302	0.127	0.2243	0.2062	0.2223	0.111	0.1363	0.2791	Mill Hill
143		Mill Wood (GB Clone 77)	0.0468	0.1245	0.039	0.1465	0.1417	0.0408	0.1173	0.1092	0.0456	0.0068	0.035	0.1311	0.2254	0.1549	-0.0067	0.0849	0.0379	0.1251	0.0882	0.1071	0.0363	-0.0037	-0.0216	0.0252	0.0922	0.0386	0.0801	0.0231	-0.0141	0.1901	0.0281	0.0014	0.2875	0.0892	0.1452	-0.0629	0.2159	0.2439	Mill Wood (GB Clone 77)
144		Mintching Wood A (GB Clone 78)	0.1821	0.2592	0.2341	0.1806	0.2185	0.2067	0.1893	0.1797	0.2154	0.1721	0.2371	0.2134	0.2268	0.1313	0.2212	0.2671	0.0928	0.2591	0.2437	0.2649	0.236	0.2527	0.1904	0.2197	0.246	0.076	0.2866	0.1715	0.1635	0.3085	0.1083	0.1023	0.3639	0.19	0.1754	0.1249	0.2259	0.2901	Mintching Wood A (GB Clone 78)
145		Nagshead	0.0616	0.1859	0.0496	0.1084	0.0539	0.0674	0.0488	0.0731	-0.0162	-0.0184	0.0634	0.1362	0.0738	0.0466	0.0215	0.1112	-0.0125	-0.0073	0.0597	0.0507	0.0676	-0.0063	0.0154	0.055	0.0695	-0.0014	0.105	0.0363	0.0287	0.1945	0.0466	-0.0133	0.2228	0.0679	0.1005	0.02	0.1445	0.2592	Nagshead
146		Nailbridge	0.1404	0.245	0.1316	0.1847	0.0706	0.1886	0.1447	0.1653	0.0973	0.1252	0.1066	0.1669	0.1067	0.1805	0.1071	0.1887	0.0927	0.0825	0.0884	0.1053	0.1399	0.0771	0.0604	0.057	0.0539	0.0655	0.2142	0.0826	0.0639	0.1936	0.1175	0.0841	0.2675	0.1482	0.153	0.0646	0.206	0.2433	Nailbridge
147		Nashdom A (GB Clone 80)	0.0588	0.0448	0.0417	0.1398	0.1672	0.0459	0.1212	0.1207	0.1529	0.0907	0.0953	0.1671	0.196	0.1321	0.0673	0.0793	0.0687	0.1769	0.1777	0.1266	0.1341	0.1694	0.0809	0.1582	0.145	0.0892	0.1582	0.1311	0.1412	0.1544	0.0757	0.0992	0.2682	0.1587	0.1781	0.0417	0.1008	0.2336	Nashdom A (GB Clone 80)
148		Nettlecombe Park	0.0923	0.2063	0.0826	0.1645	0.1018	0.116	0.1398	0.1383	0.0541	0.0756	0.0992	0.1925	0.1517	0.1935	0.064	0.1654	0.1162	0.0699	0.083	0.0921	0.0904	0.0084	0.0347	0.1092	0.0877	0.1184	0.1133	0.0878	0.057	0.2039	0.1286	0.0821	0.3163	0.1787	0.1708	0.0635	0.2621	0.2583	Nettlecombe Park
149		Neuadd, Cwmdu	0.0865	0.1237	0.0318	0.1811	0.1301	0.079	0.1309	0.1642	0.0519	0.0133	0.0271	0.1977	0.1604	0.1221	0.0541	0.1305	0.0275	0.086	0.1497	0.1114	0.1497	0.099	0.0209	0.125	0.1314	0.0598	0.1799	0.1337	0.1079	0.1306	0.0576	0.0972	0.1893	0.124	0.1472	0.0522	0.0969	0.2601	Neuadd, Cwmdu
150		Norsey Wood	0.0619	0.1755	0.0782	0.154	0.0745	0.136	0.1331	0.1438	0.0851	0.0722	0.097	0.1577	0.1284	0.1471	0.0496	0.1572	0.0568	0.0725	0.0676	0.0877	0.0759	0.0208	0.0251	0.0309	0.0875	0.0638	0.1249	0.0295	0.0506	0.2011	0.0847	0.1049	0.2301	0.1251	0.1804	0.0104	0.1737	0.234	Norsey Wood
151		Nower Wood (GB Clone 82)	0.0146	0.1234	-0.0222	0.2099	0.166	0.0846	0.1107	0.1629	0.1097	0.0303	0.0796	0.2207	0.2406	0.203	0.0156	0.1718	0.0967	0.183	0.086	0.0988	0.0412	0.0598	-0.0434	0.1568	0.12	0.0782	0.0062	0.0966	0.092	0.2116	0.1295	0.0789	0.3581	0.1888	0.1947	0.001	0.232	0.2837	Nower Wood (GB Clone 82)
152		Obelisk A (GB Clone 84)	0.0506	0.0744	0.0318	0.1761	0.1057	0.071	0.1029	0.131	0.1163	0.0748	0.131	0.1908	0.1712	0.1308	0.0686	0.1162	0.0526	0.1515	0.0647	0.1331	0.1074	0.108	0.0874	0.0761	0.0641	0.0683	0.1302	0.0962	0.0855	0.1416	0.0814	0.0693	0.2454	0.16	0.1782	0.0174	0.1955	0.151	Obelisk A (GB Clone 84)
153		Old Bracknell Rd	0.1821	0.2644	0.1838	0.1629	0.1455	0.1766	0.1103	0.1494	0.1019	0.1067	0.1656	0.1666	0.1309	0.124	0.2039	0.2595	0.0928	0.1227	0.1619	0.1834	0.2759	0.1447	0.14	0.1416	0.0575	0.0704	0.2691	0.168	0.0647	0.1925	0.0691	-0.0211	0.3984	0.1522	0.0811	0.1655	0.3009	0.233	Old Bracknell Rd
154		Parkhill Inclosure	0.0639	0.1779	0.0535	0.1432	0.1417	0.1362	0.1174	0.1174	0.1175	0.1028	0.1352	0.1617	0.1862	0.1082	0.0803	0.159	0.0651	0.1202	0.1377	0.0633	0.0913	0.0296	0.011	0.1243	0.1192	0.0622	0.1288	0.0982	0.0948	0.2222	0.097	0.0559	0.2986	0.1444	0.1488	0.0039	0.1421	0.2894	Parkhill Inclosure
155		Pencalenick (GB Clone 86)	0.0143	0.1493	0.0109	0.0678	0.0734	0.0321	0.0578	0.0582	-0.0538	0.0145	0.0408	0.0447	0.1594	0.0064	-0.0716	0.1248	-0.14	-0.0335	0.0295	-0.035	0.0442	-0.1021	-0.1411	-0.0214	0.0008	-0.0173	0.0981	0.0106	0.0143	0.1577	0.0144	-0.0052	0.1265	0.0642	0.1223	-0.097	-0.0052	0.2196	Pencalenick (GB Clone 86)
156		Penny Hill	0.0533	0.1855	0.0309	0.1598	0.071	0.0353	0.0187	0.0995	0.0729	0.0837	0.0351	0.1463	0.1245	0.124	0.0366	0.0733	0.0764	0.076	0.0529	-0.0898	0.0844	-0.0668	-0.0723	0.0379	-0.0289	0.0723	0.0922	0.003	0.0672	0.1422	0.0454	0.0672	0.3135	0.087	0.1232	0.0398	0.157	0.273	Penny Hill
157		Penshurst Collinses Toll	0.0785	0.2298	0.125	0.175	0.1042	0.142	0.1833	0.1656	0.0964	0.11	0.1498	0.1955	0.1501	0.1868	0.1226	0.2005	0.1096	0.1094	0.0755	0.1531	0.1215	0.0527	0.0966	0.0717	0.1291	0.13	0.1681	0.0659	0.094	0.2206	0.1558	0.1371	0.2904	0.1939	0.2244	0.0407	0.2808	0.2593	Penshurst Collinses Toll
158		Pentillie A (GB Clone 87)	0.0992	0.1886	0.076	0.1413	0.1061	0.1235	0.1119	0.1306	0.0515	0.0702	0.0905	0.1393	0.1644	0.1359	0.0251	0.1953	0.0364	0.0193	0.081	0.0653	0.1182	0.0274	0.0139	0.0278	0.0182	0.042	0.141	0.0695	0.0355	0.1676	0.0617	0.0356	0.2233	0.1441	0.1578	0.0373	0.151	0.1841	Pentillie A (GB Clone 87)
159		Pentwyn	0.0373	0.0659	0.0195	0.1677	0.0706	0.0627	0.1079	0.1453	0.0173	-0.0385	0.0124	0.1554	0.1204	0.1193	-0.0067	0.1123	-0.0112	0.1059	0.0599	0.1385	0.1093	0.0658	0.0596	0.0273	0.1077	0.0178	0.1677	0.0936	0.0491	0.1849	0.0635	0.0801	0.2348	0.0998	0.1693	-0.0142	0.1995	0.2681	Pentwyn
160		Perton Wood, Stoke Edith	0.128	0.2506	0.128	0.2154	0.117	0.1599	0.1172	0.1867	0.1171	0.157	0.129	0.2258	0.1779	0.2006	0.1103	0.1746	0.1304	0.1239	0.1354	0.0472	0.1639	0.033	0.0588	0.1038	0.0244	0.1005	0.1485	0.094	0.1226	0.2145	0.1245	0.0987	0.2982	0.1695	0.19	0.1017	0.2088	0.2811	Perton Wood, Stoke Edith
161		Petridges A (GB Clone 89)	-0.005	0.1195	0.0316	0.065	0.0768	0.0913	0.1304	0.0497	0.0648	0.0625	0.1017	0.0772	0.1461	0.1392	0.0076	0.1475	0.0954	0.1003	0.0572	0.0708	0.0687	0.007	-0.0345	0.0722	0.0502	0.0605	0.0736	0.0288	0.0271	0.1377	0.0583	0.0256	0.3198	0.1367	0.1065	-0.0337	0.2089	0.203	Petridges A (GB Clone 89)
162		Philip's Wood	0.0774	0.2008	0.0906	0.1472	0.1268	0.0897	0.157	0.1556	0.0967	0.0785	0.1172	0.1911	0.1635	0.2094	0.04	0.1469	0.143	0.1168	0.1075	0.116	0.0274	0.0562	0.0531	0.1385	0.1853	0.1217	0.1294	0.051	0.0997	0.2941	0.1543	0.1097	0.342	0.1809	0.1956	0.0616	0.2146	0.3324	Philip's Wood
163		Phillips House, Dinton	0.1141	0.2536	0.1261	0.2456	0.1556	0.2014	0.1932	0.215	0.1716	0.1452	0.1586	0.2509	0.2103	0.237	0.1005	0.2192	0.1619	0.1638	0.14	0.0576	0.1477	-0.0128	0.0662	0.1094	0.1212	0.125	0.1182	0.0589	0.1213	0.256	0.128	0.1463	0.3481	0.2036	0.2388	0.1157	0.2305	0.3485	Phillips House, Dinton
164		Plantation A (GB Clone 91)	0.0506	0.1577	0.0143	0.0512	0.0587	0.078	0.0917	0.0027	0.0641	0.0155	0.0903	0.0696	0.0905	0.0981	0.0241	0.1474	0.0654	0.0805	0.0218	0.0611	0.0783	-0.0012	-0.0299	0.0793	0.0794	0.0596	0.0858	0.0204	-0.0047	0.1647	0.0606	0.0334	0.2638	0.0505	0.0924	0.0029	0.2091	0.2379	Plantation A (GB Clone 91)
165		Pontypool Park (GB Clone 93)	0.0591	0.1589	0.1305	0.1677	0.1417	0.0785	0.1371	0.1421	0.0687	0.1028	0.1158	0.1452	0.2589	0.165	0.0661	0.1798	0.0379	0.1156	0.0599	0.1841	0.19	0.0231	0.082	-0.001	0.0657	0.0924	0.2134	0.0786	-0.0141	0.275	0.1255	0.0929	0.3052	0.1628	0.2125	-0.004	0.3016	0.1757	Pontypool Park (GB Clone 93)
166		Popes Hill	0.0518	0.1461	0.0586	0.139	0.109	0.1138	0.1148	0.1207	0.1104	0.0773	0.1213	0.1442	0.1617	0.1242	0.0809	0.1145	0.0657	0.1218	0.1163	0.0835	0.1164	0.0632	0.0446	0.1022	0.0802	0.063	0.0795	0.0542	0.0751	0.1443	0.0676	0.073	0.2017	0.0962	0.1602	0.0463	0.1869	0.2275	Popes Hill
167		Powderham A (GB Clone 94)	0.0652	0.1674	0.0567	0.1558	0.1036	0.1169	0.1463	0.1358	0.0677	0.0555	0.1075	0.1939	0.1441	0.1587	0.0535	0.1413	0.0866	0.0911	0.1072	0.0794	0.0576	0.0397	0.0348	0.1187	0.1114	0.0765	0.0805	0.085	0.103	0.1937	0.1189	0.0718	0.2273	0.1594	0.1788	0.045	0.1832	0.2597	Powderham A (GB Clone 94)
168		Preston Hall	0.0716	0.1706	0.1487	0.2321	0.1939	0.1328	0.1065	0.2024	0.1877	0.2115	0.158	0.2074	0.2343	0.1762	0.2039	0.1592	0.1299	0.1818	0.2088	0.0266	0.2226	0.1088	0.115	0.1	-0.0089	0.1377	0.202	0.0811	0.1344	0.0894	0.034	0.1479	0.3851	0.1637	0.2081	0.0969	0.2298	0.2095	Preston Hall
169		Priest Wood	0.0907	0.2267	0.1251	0.1192	0.1195	0.1069	0.1716	0.1167	0.0766	0.0795	0.1236	0.1349	0.1813	0.1689	0.0632	0.185	0.1034	0.1079	0.1016	0.1655	0.081	0.052	0.0878	0.0971	0.177	0.1425	0.2029	0.0862	0.0847	0.2887	0.1761	0.1312	0.3125	0.1829	0.209	0.0297	0.2905	0.3011	Priest Wood
170		Priors Wood, Stoke Edith	0.1373	0.2459	0.1501	0.0091	0.164	0.1229	0.0926	0.0624	0.0456	0.0763	0.1339	0.0275	0.1362	0.0065	0.1456	0.1854	0.0006	0.0926	0.189	0.1216	0.2397	0.0658	0.048	0.1444	0.1077	0.0406	0.2116	0.1081	0.0226	0.1528	-0.0184	-0.0142	0.2929	0.0234	0.0347	0.0751	0.191	0.2796	Priors Wood, Stoke Edith
171		Puttenage	0.1107	0.1847	0.0779	0.1582	0.0842	0.142	0.1313	0.1389	0.1029	0.078	0.0848	0.1611	0.1376	0.1502	0.0495	0.1843	0.0708	0.0844	0.0728	0.07	0.0787	0.0329	0.0247	0.0464	0.0963	0.0672	0.1608	0.0701	0.0402	0.1934	0.0807	0.0773	0.2406	0.1383	0.1494	0.042	0.1504	0.2261	Puttenage
172		quarry	0.0921	0.1887	0.0564	0.2217	0.1532	0.1166	0.1553	0.1919	0.0383	0.0883	0.0616	0.2508	0.1829	0.182	0.0945	0.1471	0.1123	0.1292	0.1665	0.1108	0.15	0.0459	0.0242	0.1723	0.1301	0.0925	0.1038	0.1039	0.1308	0.2224	0.1208	0.1202	0.2364	0.1093	0.1382	0.0848	0.1539	0.3423	quarry
173		Rapley Lake	-0.0095	0.1118	0.0306	0.049	0.0864	0.0858	0.0783	0.0349	0.0492	-0.0051	0.0965	0.0614	0.1384	0.0468	-0.0011	0.1577	0.0268	0.0953	0.0977	0.0553	0.1457	-0.0155	-0.0016	0.0733	0.0441	0.0092	0.1158	0.0229	0.0031	0.1825	-0.012	0.0122	0.3335	0.0861	0.0805	0.0156	0.1934	0.2602	Rapley Lake
174		RFDC	0.0637	0.2129	0.0923	0.1077	0.1088	0.1481	0.1661	0.0992	0.0849	0.0692	0.0903	0.1103	0.1876	0.1729	0.0249	0.2234	0.1036	0.1137	0.0905	0.0863	0.1482	-0.0242	0.0163	0.072	0.106	0.1257	0.1874	0.06	0.0344	0.2252	0.1147	0.1389	0.3443	0.1641	0.18	0.0326	0.2732	0.2943	RFDC
175		Rough Hill Wood (GB Clone 97)	-0.0202	0.1409	0.0138	0.1175	0.0535	0.0627	0.0496	0.0846	0.0046	0.0373	0.0585	0.1382	0.1073	0.0515	-0.0067	0.0942	-0.0192	0.0755	0.0488	-0.0253	0.0108	-0.0531	-0.0942	0.0736	0.0421	-0.0478	0.0197	-0.0099	0.0253	0.1815	0.0396	-0.0279	0.1459	0.0473	0.0925	-0.1041	-0.0052	0.2531	Rough Hill Wood (GB Clone 97)
176		Ruperra	0.0865	0.1656	0.0577	0.1506	0.1026	0.0902	0.116	0.1402	0.0498	0.0487	0.0762	0.1852	0.1319	0.1043	0.0573	0.1274	0.0308	0.0401	0.1094	0.0692	0.0492	0.0613	0.0096	0.0973	0.13	0.0569	0.143	0.0893	0.1144	0.216	0.095	0.0612	0.2097	0.135	0.1356	0.0473	0.0587	0.2725	Ruperra
177		Rydal Hall	0.0591	0.1075	0.0167	0.1794	0.1877	0.0811	0.1154	0.1421	0.1283	0.0625	0.129	0.1877	0.2473	0.1267	0.0311	0.1565	0.0415	0.1523	0.155	0.1071	0.1267	0.1018	-0.0016	0.1394	0.1209	0.0406	0.1335	0.1339	0.1073	0.1934	0.0759	0.0611	0.2512	0.1651	0.1973	-0.0194	0.0956	0.2407	Rydal Hall
178		Sandpit	0.1109	0.2314	0.1028	0.09	0.1272	0.1344	0.1371	0.0548	0.0834	0.106	0.1387	0.0661	0.1633	0.0887	0.0311	0.2278	0.0451	0.0467	0.1017	0.0653	0.1402	0.0449	0.0112	0.0812	0.1301	0.0869	0.1866	0.0375	0.0568	0.2626	0.0776	0.0838	0.2893	0.105	0.1288	0.0109	0.1215	0.2935	Sandpit
179		Scarles Grove (GB Clone 98)	0.0307	0.1379	0.1046	0.11	0.096	0.0597	0.1223	0.1283	0.0213	0.0479	0.1203	0.1441	0.1099	0.0381	0.128	0.1161	-0.0739	0.1335	0.154	0.1421	0.1647	0.1042	0.0589	0.1438	0.1167	-0.0083	0.1876	0.1117	0.1157	0.2075	0.0579	0.031	0.1476	0.0861	0.1177	0.001	0.1101	0.2229	Scarles Grove (GB Clone 98)
180		Scrub Wood 1 (GB Clone 99)	0.1094	0.1791	0.1172	0.1161	0.1244	0.1296	0.0801	0.1179	0.1114	0.1191	0.1447	0.1237	0.1554	0.0624	0.1311	0.1692	0.024	0.1082	0.145	0.13	0.1779	0.126	0.0288	0.1084	0.1206	0.0403	0.2078	0.0825	0.05	0.1897	0.0001	0.0479	0.2255	0.0496	0.0605	0.0592	0.0857	0.2115	Scrub Wood 1 (GB Clone 99)
181		Sculpture trail	0.1372	0.2062	0.1033	0.1831	0.1008	0.1338	0.1397	0.1502	0.1032	0.0965	0.091	0.2053	0.1626	0.176	0.0368	0.1822	0.0851	0.074	0.0881	0.0848	0.0996	0.0852	0.0497	0.0637	0.1141	0.0811	0.1752	0.0878	0.1123	0.248	0.1177	0.0988	0.2537	0.1701	0.18	0.0878	0.1132	0.2866	Sculpture trail
182		Sellings Wood (GB Clone 101)	0.092	0.1917	0.0737	0.1537	0.128	0.0296	0.1287	0.1168	-0.0084	0.0068	0.1077	0.1633	0.2114	0.1313	0.0045	0.1671	0.0006	0.076	0.0492	0.1907	0.1172	0.038	0.0774	0.0909	0.1571	0.1243	0.1445	0.1107	0.0672	0.2719	0.1337	0.1058	0.2759	0.1704	0.2069	0.0159	0.3009	0.2817	Sellings Wood (GB Clone 101)
183		Serridge	0.0452	0.1796	0.0695	0.1242	0.0627	0.1115	0.1245	0.0992	0.0685	0.0558	0.0742	0.1304	0.145	0.1492	0.0065	0.1577	0.0719	0.0719	0.0367	0.0395	0.0348	-0.0312	0.0037	0.0167	0.0848	0.0641	0.1312	0.0115	0.0297	0.2162	0.0984	0.0686	0.2727	0.1332	0.1658	-0.0199	0.1827	0.2505	Serridge
184		Seven Sisters, Penshurst	0.2351	0.3185	0.2526	0.3147	0.2567	0.2379	0.2911	0.3077	0.2566	0.2703	0.2846	0.3278	0.3447	0.3341	0.248	0.2513	0.2647	0.282	0.2348	0.2946	0.2944	0.2375	0.2193	0.2423	0.281	0.2659	0.2886	0.1932	0.1813	0.3872	0.2459	0.2485	0.4014	0.2521	0.2902	0.2122	0.3852	0.4045	Seven Sisters, Penshurst
185		Shepherds	0.1556	0.2725	0.147	0.1885	0.1574	0.209	0.2297	0.1483	0.1717	0.1716	0.2201	0.1943	0.195	0.1999	0.1244	0.2575	0.1917	0.1698	0.1168	0.163	0.1644	0.0741	0.0917	0.1544	0.1526	0.1536	0.1615	0.1073	0.1084	0.2851	0.1872	0.1442	0.3878	0.2264	0.2235	0.1209	0.3266	0.3182	Shepherds
186		Shorne Woods	0.0858	0.1478	0.0783	0.2125	0.1272	0.1479	0.1662	0.1756	0.1348	0.1216	0.1513	0.206	0.1942	0.1845	0.0988	0.1779	0.0486	0.2123	0.1116	0.0921	0.1596	0.0268	0.042	0.1277	0.0636	0.0776	0.0509	0.1102	0.0957	0.1849	0.0581	0.0911	0.2708	0.1673	0.196	0.0665	0.2576	0.2376	Shorne Woods
187		Silwood	0.0405	0.035	0.0733	0.2152	0.1953	0.0237	0.1209	0.1785	0.1506	0.1655	0.1665	0.2177	0.2204	0.1683	0.2126	0.1189	0.089	0.2098	0.178	0.1703	0.2448	0.1846	0.1481	0.1361	0.0802	0.1372	0.2352	0.1546	0.1229	0.1017	0.0724	0.1019	0.355	0.1912	0.2088	0.0794	0.2504	0.1757	Silwood
188		Skippet Wood A (GB Clone 102)	0.0669	0.2028	0.046	0.1444	0.132	0.0826	0.1347	0.1169	0.0226	0.0311	0.0815	0.1623	0.1598	0.1444	-0.0029	0.1413	0.0761	0.025	0.111	0.0305	0.0915	-0.0205	-0.0244	0.0967	0.1005	0.0814	0.0699	0.0318	0.0683	0.2165	0.0943	0.072	0.2686	0.1267	0.1872	0.0372	0.1543	0.3182	Skippet Wood A (GB Clone 102)
189		Sling	0.0111	0.1173	-0.0037	0.1005	0.057	0.0654	0.0623	0.0189	0.0456	-0.0092	0.0018	0.094	0.1633	0.148	-0.0918	0.1545	0.0556	0.0893	-0.0065	0.023	0.0446	-0.0752	-0.0714	-0.0309	-0.0522	0.0071	0.0458	0.0056	-0.0602	0.1181	0.0301	-0.0302	0.3204	0.1024	0.1288	-0.0686	0.2238	0.1831	Sling
190		Smithy Wood (GB Clone 105)	0.0536	0.2569	0.0817	0.1609	0.0849	0.0973	0.1011	0.1073	0.0697	0.0943	0.0958	0.1678	0.1155	0.1936	0.0317	0.1619	0.1186	0.0801	0.0223	-0.0005	0.0109	-0.1046	-0.0507	0.0624	0.0599	0.0763	0.0333	-0.0485	0.0283	0.2442	0.1184	0.0616	0.3713	0.1387	0.1827	0.0061	0.2076	0.3293	Smithy Wood (GB Clone 105)
191		Snipe Pond Shaw Wood (GB Clone 106)	0.1925	0.2314	0.2097	0.1588	0.2244	0.2318	0.1694	0.1697	0.2005	0.1655	0.2376	0.1417	0.2329	0.0847	0.2022	0.2824	0.1017	0.202	0.247	0.2488	0.3122	0.2146	0.2012	0.1682	0.1909	0.1119	0.3258	0.1949	0.0791	0.2736	0.0415	0.1441	0.4019	0.1673	0.1496	0.1607	0.311	0.3043	Snipe Pond Shaw Wood (GB Clone 106)
192		Soigne chestnut (GB Clone 107)	0.1631	0.2174	0.1858	0.2321	0.125	0.1618	0.2224	0.2187	0.1192	0.1909	0.2016	0.2362	0.1788	0.1456	0.2178	0.1825	0.0198	0.2212	0.1791	0.2463	0.2853	0.1725	0.1772	0.2086	0.1932	0.1426	0.2895	0.2246	0.2036	0.2854	0.1748	0.1802	0.1672	0.1659	0.1967	0.1171	0.2526	0.3038	Soigne chestnut (GB Clone 107)
193		Speech House	0.1139	0.2332	0.1249	0.1974	0.1014	0.1502	0.1179	0.1635	0.1506	0.1479	0.1403	0.1954	0.131	0.1859	0.1269	0.163	0.1418	0.1289	0.0921	0.0283	0.145	0.0372	0.0659	0.0652	0.0891	0.121	0.1696	0.0348	0.067	0.2051	0.1022	0.1355	0.3177	0.1343	0.1943	0.0769	0.2343	0.2921	Speech House
194		St Pierre	0.0448	0.1382	0.0264	0.113	0.0783	0.0873	0.1318	0.109	0.0455	0.034	0.0744	0.1423	0.1105	0.133	-0.0069	0.1304	0.0654	0.0609	0.0734	0.0324	0.0382	-0.004	-0.0014	0.0905	0.0958	0.0646	0.0686	0.0542	0.0705	0.197	0.0909	0.0572	0.2363	0.1402	0.1416	0.019	0.1327	0.2565	St Pierre
195		Staple Edge	0.1135	0.2278	0.0828	0.1451	0.0748	0.1499	0.1164	0.1203	0.1038	0.0984	0.1296	0.1627	0.1183	0.1896	0.0502	0.1851	0.1149	0.0867	0.0352	0.0596	0.063	-0.029	0.0158	0.0729	0.1045	0.1007	0.1206	0.0532	0.0371	0.2424	0.1283	0.0969	0.3073	0.1494	0.1793	0.0621	0.2309	0.2915	Staple Edge
196		Steam Mills	0.0499	0.1887	0.0656	0.1208	0.0934	0.111	0.1098	0.1058	0.0687	0.066	0.0951	0.0742	0.1942	0.1549	-0.0853	0.1545	0.0556	0.0993	0.0099	0.0844	0.0949	-0.0575	0.0049	0.0012	0.0678	0.0795	0.0534	-0.0594	-0.026	0.2318	0.0396	0.0911	0.3104	0.0866	0.1624	-0.0247	0.2198	0.2739	Steam Mills
197		Stopham Estate A (GB Clone 110)	0.0845	0.1524	0.0977	0.1947	0.171	0.1336	0.1899	0.1843	0.1488	0.1007	0.1562	0.217	0.2226	0.1863	0.0555	0.189	0.1131	0.1526	0.1662	0.1754	0.0963	0.1522	0.075	0.1523	0.1819	0.1022	0.157	0.0856	0.1285	0.2723	0.0987	0.1309	0.3107	0.1924	0.209	0.0623	0.1648	0.2547	Stopham Estate A (GB Clone 110)
198		Stour Wood	0.0695	0.1853	0.0737	0.1596	0.1069	0.0471	0.0933	0.1333	0.0504	0.0693	0.0814	0.1884	0.1614	0.1368	0.0492	0.0649	0.0521	0.0559	0.0959	0.0919	0.0337	0.0448	0.0293	0.0905	0.1316	0.0838	0.1125	0.0528	0.094	0.2395	0.1246	0.0736	0.2557	0.1339	0.1698	0.0062	0.1522	0.2817	Stour Wood
199		Stretton Hall A (GB Clone 112)	0.0009	0.1762	-0.0037	0.057	0.043	0.0119	0.0581	0.002	-0.0308	-0.0133	0.0527	0.0619	0.1006	0.06	-0.0415	0.1275	-0.0112	0	-0.0279	0.0086	0.0487	-0.1321	-0.0865	0.0101	0.0196	0.0366	0.0458	-0.0021	-0.02	0.1798	0.0794	0.0144	0.2492	0.0839	0.1304	-0.098	0.1953	0.2439	Stretton Hall A (GB Clone 112)
200		Sunninghill	0.1094	0.1512	0.0501	0.1646	0.1152	0.1085	0.126	0.1302	0.0747	0.0277	0.0589	0.1906	0.1281	0.1087	0.0651	0.1446	0.0506	0.078	0.1406	0.076	0.1247	0.0915	0.0346	0.1189	0.1126	0.0386	0.1481	0.1156	0.101	0.1451	0.0593	0.0577	0.1933	0.1125	0.1252	0.0798	0.1014	0.2627	Sunninghill
201		Swanton Valley (GB Clone 114)	0.0526	0.1069	0.0469	0.1329	0.1084	0.0148	0.0823	0.0981	0.053	0.0221	0.0349	0.1158	0.1652	0.1221	-0.0236	0.0937	0.0268	0.0537	0.1076	0.0385	0.0978	0.0411	-0.0489	0.0144	0.0737	0.0092	0.1669	0.0205	0.0411	0.231	0.03	0.0372	0.2806	0.1018	0.1177	0.0252	0.0673	0.2804	Swanton Valley (GB Clone 114)
202		Swillow Wood, Stoke Edith	0.0245	0.1855	0.0581	0.1537	0.0677	0.0522	0.0583	0.096	0.0729	0.063	0.07	0.1666	0.118	0.1629	0.0045	0.0993	0.0489	0.1131	0.03	0.0405	-0.0117	-0.0803	-0.0501	0.07	0.1063	0.0489	0.0709	-0.0047	0.0032	0.2579	0.105	0.0496	0.3381	0.1283	0.1726	-0.0466	0.1753	0.2956	Swillow Wood, Stoke Edith
203		Tapeley Park A (GB Clone 115)	0.1084	0.2322	0.0975	0.186	0.1874	0.1843	0.2269	0.1779	0.1276	0.1248	0.185	0.2056	0.2418	0.2247	0.0818	0.2417	0.1707	0.1644	0.1666	0.1451	0.1386	0.0355	0.0368	0.1796	0.1078	0.1671	0.1278	0.1237	0.1223	0.2584	0.159	0.1508	0.3826	0.2363	0.2332	0.0926	0.3228	0.3109	Tapeley Park A (GB Clone 115)
204		The Hangings	0.0696	0.1412	0.0397	0.1546	0.1069	0.0936	0.1251	0.1228	0.0973	0.0439	0.1071	0.1815	0.15	0.1458	0.0413	0.1355	0.064	0.1224	0.0825	0.0717	0.0126	0.0507	0.0101	0.1138	0.1417	0.0543	0.0795	0.0755	0.0825	0.2224	0.1045	0.0478	0.2764	0.1543	0.1676	0.0284	0.1685	0.271	The Hangings
205		The Weir	0.168	0.2074	0.127	0.2394	0.1456	0.1464	0.1626	0.2118	0.1196	0.1448	0.1178	0.2769	0.1713	0.1671	0.1365	0.1543	0.0725	0.1136	0.1932	0.1336	0.1382	0.1731	0.0781	0.1796	0.178	0.0823	0.2203	0.1719	0.1966	0.2696	0.1527	0.1067	0.2034	0.1709	0.1748	0.121	0.0017	0.3127	The Weir
206		Thick Thorn Wood A (GB Clone 117)	0.0587	0.0656	0.0287	0.2427	0.1802	0.0553	0.0961	0.2024	0.1257	0.0811	0.1105	0.2772	0.2175	0.1894	0.1214	0.0867	0.1103	0.1651	0.1816	0.1171	0.1509	0.1491	0.1177	0.1624	0.0536	0.0914	0.1	0.1596	0.1683	0.1033	0.0966	0.06	0.3026	0.2051	0.2151	0.0975	0.1918	0.2008	Thick Thorn Wood A (GB Clone 117)
207		Thorrington A (GB Clone 119)	0.0832	0.1862	0.0856	0.1199	0.0931	0.1054	0.0956	0.1051	0.0806	0.0929	0.1094	0.1333	0.1263	0.0683	0.0638	0.1171	0.0322	0.0856	0.1277	0.0472	0.0894	0.0653	0.0156	0.1014	0.1106	0.0254	0.1114	0.003	0.066	0.2211	0.0202	0.0384	0.1723	0.03	0.0858	0.0341	0.0476	0.2692	Thorrington A (GB Clone 119)
208		Three Sisters, Bachymbyd	0.1947	0.2369	0.2171	0.1851	0.2003	0.2057	0.1694	0.1843	0.2141	0.1514	0.2326	0.1783	0.1915	0.1267	0.2294	0.2691	0.0825	0.2599	0.2127	0.2894	0.2926	0.2402	0.2094	0.1834	0.2063	0.1031	0.3116	0.1949	0.0887	0.2131	0.0396	0.1193	0.3695	0.1805	0.1638	0.1464	0.332	0.2501	Three Sisters, Bachymbyd
209		Thrift Wood (GB Clone 121)	0.0375	0.247	0.122	0.1315	0.0777	0.1509	0.1651	0.1202	0.1292	0.1035	0.0972	0.1463	0.1555	0.2106	0.0619	0.2271	0.1239	0.1649	0.0339	0.072	0.0768	-0.0623	-0.0083	0.0542	0.0764	0.1017	0.0852	-0.0315	0.0172	0.1992	0.0831	0.0987	0.3891	0.177	0.1835	0.011	0.281	0.2489	Thrift Wood (GB Clone 121)
210		Timberline A (GB Clone 122)	0.0765	0.1643	0.0248	0.1956	0.1254	0.115	0.121	0.1483	0.0758	0.0718	0.0772	0.22	0.1578	0.1707	0.0308	0.1471	0.1087	0.095	0.1265	0.0271	0.1015	0.0146	-0.013	0.1286	0.063	0.0547	0.0409	0.0762	0.1096	0.1954	0.095	0.0612	0.2633	0.1372	0.1475	0.0704	0.1089	0.3023	Timberline A (GB Clone 122)
211		Tolt (GB Clone 124)	0.0176	0.1493	-0.0097	0.0173	0.0531	0.0461	0.0298	-0.0198	0.0003	-0.0468	0.0186	0.0184	0.0392	0.0111	0.0204	0.1517	-0.0312	0.0352	-0.0023	-0.0593	0.068	-0.0614	-0.1246	0.0251	-0.0016	-0.0381	0.0702	0.0156	-0.0662	0.0367	-0.029	-0.0864	0.2751	0.0412	0.0327	-0.0794	0.1538	0.2062	Tolt (GB Clone 124)
212		Tortworth Chestnut	0.1791	0.2436	0.1582	0.234	0.2013	0.167	0.2116	0.2034	0.1783	0.148	0.1929	0.2624	0.2625	0.225	0.1867	0.2267	0.1559	0.2148	0.1855	0.225	0.1934	0.1776	0.1479	0.1981	0.2262	0.1834	0.2723	0.2174	0.1551	0.2646	0.2092	0.1796	0.3157	0.2392	0.2611	0.1026	0.3423	0.2896	Tortworth Chestnut
213		Tregothnan (GB Clone 125)	0.0276	0.1846	0.0308	0.1402	0.1152	0.1344	0.1022	0.116	0.0496	0.059	0.0826	0.1092	0.1748	0.1004	-0.0296	0.1873	0.027	-0.0166	0.0916	-0.0492	0.0986	-0.0575	-0.064	0.0079	0.0219	0.0325	0.0986	-0.0152	0.0253	0.1934	0.0044	0.0669	0.2746	0.0919	0.1423	-0.0194	0.0508	0.2824	Tregothnan (GB Clone 125)
214		Trelowarren A (GB Clone 126)	0.0269	0.1189	0.029	0.1295	0.0855	0.0171	0.0498	0.1048	-0.051	-0.0187	0.0382	0.1614	0.1317	0.0797	0.0314	0.0767	0.001	0.0006	0.0944	0.0702	0.0749	0.0051	0.0209	0.0782	0.0098	0.0449	0.1125	0.074	0.0471	0.144	0.0576	-0.0078	0.2687	0.1128	0.1233	0.0314	0.1903	0.2011	Trelowarren A (GB Clone 126)
215		Trew Wood A (SC 305-01) (GB Clone 128)	0.0886	0.2333	0.0758	0.1241	0.087	0.0837	-0.0096	0.0699	0.087	0.0963	0.0698	0.0742	0.1515	0.0847	0.0259	0.1232	0.027	0.0355	0.0671	-0.0939	0.1369	-0.0575	-0.11	-0.0032	0.0196	0.0242	0.1356	-0.0681	-0.0171	0.1867	-0.0163	0.0353	0.1785	-0.0858	0.099	0.006	0.0078	0.2824	Trew Wood A (SC 305-01) (GB Clone 128)
216		Turnips Grove	0.0631	0.1612	0.0582	0.146	0.075	0.0956	0.1295	0.129	0.0478	0.0648	0.0954	0.1919	0.0955	0.1341	0.0512	0.1058	0.0673	0.0681	0.1056	0.0546	0.0342	0.0346	0.0104	0.1255	0.1108	0.0623	0.0603	0.0498	0.0933	0.2228	0.0934	0.0559	0.2298	0.1225	0.1313	0.0489	0.1164	0.2717	Turnips Grove
217		Twenty Acre Wood A (GB Clone 130)	0.0884	0.2215	0.1003	0.1334	0.1066	0.154	0.1512	0.1224	0.1107	0.1194	0.1364	0.0982	0.1947	0.1617	0.0401	0.1853	0.0821	0.1256	0.0377	0.0975	0.096	-0.014	0.013	0.0156	0.0748	0.0938	0.1351	0.0256	0.0179	0.215	0.1021	0.0965	0.2884	0.1413	0.1761	-0.0278	0.239	0.2583	Twenty Acre Wood A (GB Clone 130)
218		Upper Glen	0.0456	0.136	0.0549	0.0781	0.0713	0.0934	0.0969	0.0791	0.0551	0.0458	0.0962	0.1059	0.1219	0.1148	0.0216	0.1343	0.0667	0.0697	0.0789	0.0836	0.09	0.0097	0.0535	0.0812	0.0674	0.0857	0.104	0.0581	0.0364	0.1793	0.0745	0.0574	0.2804	0.1366	0.1272	0.04	0.2195	0.2005	Upper Glen
219		Waldershare	-0.0382	0.1447	0.0194	0.0604	0.0832	0.065	0.0557	0.0428	0.0492	0.0479	0.0639	0.0317	0.1384	0.0553	-0.0236	0.1416	-0.0312	0.0389	0.041	-0.035	-0.007	-0.04	-0.1246	-0.0214	0.0172	-0.0381	0.082	-0.0649	-0.0025	0.1522	0.0024	-0.0301	0.2165	0.0585	0.1208	-0.147	-0.0117	0.2028	Waldershare
220		Walks Copse (GB Clone 132)	0.072	0.2317	0.0867	0.1453	0.1605	0.1604	0.1607	0.1344	0.0847	0.1138	0.1461	0.1439	0.2406	0.1538	-0.0068	0.2212	0.0967	0.1268	0.1197	0.0337	0.0412	-0.0282	-0.0221	0.113	0.1163	0.111	0.0809	0.0498	0.0823	0.2995	0.1248	0.0863	0.3397	0.1576	0.1746	-0.036	0.1725	0.344	Walks Copse (GB Clone 132)
221		Wardwell Wood, Newington	0.1144	0.1836	0.1059	0.2041	0.1149	0.1401	0.1463	0.1905	0.0192	0.0827	0.1092	0.2391	0.1554	0.1414	0.1045	0.1513	0.0591	0.115	0.1798	0.1485	0.1619	0.1218	0.0759	0.1776	0.1428	0.0618	0.173	0.1388	0.1452	0.2375	0.1031	0.0911	0.1688	0.1078	0.1174	0.1117	0.157	0.2994	Wardwell Wood, Newington
222		Warley Place	0.054	0.1678	0.0475	0.1445	0.0707	0.0677	0.0878	0.1109	0.0489	0.0653	0.0463	0.1637	0.1084	0.1302	0.0302	0.0775	0.0436	0.0484	0.0687	0.0302	0.0459	-0.0136	-0.0379	0.0564	0.0867	0.0356	0.0845	0.0055	0.0315	0.203	0.0765	0.0645	0.193	0.0731	0.1386	-0.0101	0.0793	0.2663	Warley Place
223		Warren Grove	0.1055	0.1804	0.0525	0.1527	0.0934	0.0988	0.0163	0.0882	0.0573	0.0625	0.1021	0.1621	0.1331	-0.0079	0.071	0.136	-0.0356	0.0355	0.1181	0.0637	0.1335	0.0955	0.0299	0.0942	0.0922	-0.0196	0.1957	0.102	0.0743	0.2318	0.0301	-0.0517	0.222	0.0415	0.0384	0.0348	-0.0186	0.2592	Warren Grove
224		Warren Plantation A (GB Clone 133)	0.151	0.1978	0.1185	0.2732	0.225	0.1255	0.1536	0.2289	0.237	0.2206	0.182	0.2802	0.2598	0.1923	0.2307	0.124	0.1593	0.2099	0.2471	0.1319	0.2588	0.2025	0.1509	0.1629	0.1202	0.1341	0.2315	0.162	0.1847	0.1562	0.0757	0.1488	0.2346	0.1588	0.2244	0.1398	0.1577	0.2534	Warren Plantation A (GB Clone 133)
225		Weasenham A (GB Clone 135)	0.0506	0.1433	0.0338	0.1133	0.1086	0.1114	0.1263	0.1085	0.0528	0.0469	0.0859	0.128	0.1737	0.1332	0.0029	0.1514	0.0412	0.1102	0.1038	0.0302	0.0651	-0.0455	-0.0299	0.0978	0.0702	0.0576	0.0682	0.0671	0.0418	0.1855	0.0633	0.064	0.2343	0.1283	0.1534	0.0103	0.1991	0.2379	Weasenham A (GB Clone 135)
226		Welbeck (GB Clone 137)	0.0839	0.2463	0.0663	0.164	0.0363	0.1048	0.0479	0.1003	0.0543	0.0669	0.0492	0.1474	0.1318	0.1572	-0.0126	0.1559	0.0836	0.0512	-0.0195	-0.0354	0.0774	-0.1604	-0.0291	0.008	0.0056	0.0801	0.0809	0.0005	0.0173	0.2427	0.1054	0.0437	0.3444	0.1113	0.1328	0.0402	0.22	0.3059	Welbeck (GB Clone 137)
227		Wellhouse Wood	0.0405	0.2008	0.1282	0.0936	0.0934	0.0464	0.0539	0.081	0.0611	0.0554	0.0808	0.1203	0.1331	0.0725	0.0757	0.1296	-0.0033	0.1059	0.0848	0.1426	0.1022	0.052	0.042	0.0678	0.1319	0.0136	0.1903	0.0304	0.0334	0.2349	0.0724	0.0332	0.307	0.1126	0.1364	-0.0299	0.191	0.2376	Wellhouse Wood
228		Welshbury	0.1069	0.1748	0.0855	0.21	0.1359	0.1289	0.1646	0.1788	0.1035	0.1172	0.139	0.2457	0.174	0.1715	0.1234	0.113	0.1095	0.1423	0.1656	0.0944	0.1226	0.1085	0.073	0.1717	0.1299	0.091	0.0971	0.119	0.1538	0.1956	0.1243	0.0946	0.1406	0.1267	0.1761	0.0849	0.1382	0.2738	Welshbury
229		Wentwood	0.0931	0.2866	0.1092	0.2272	0.1297	0.1948	0.1298	0.1792	0.0927	0.1543	0.1545	0.2134	0.2193	0.2256	0.0478	0.2222	0.1255	0.0912	0.0936	0.0233	0.0971	-0.1006	-0.0665	0.0971	-0.0396	0.1079	0.0334	0.0209	0.0729	0.2697	0.1438	0.0773	0.403	0.1854	0.2132	0.0727	0.2647	0.3135	Wentwood
230		West Prawle Wood A (GB Clone 138)	0.0406	0.1473	0.0606	0.109	0.0898	0.0615	0.0993	0.1153	0.0129	0.045	0.0781	0.1394	0.1493	0.1114	0.0059	0.086	0.0365	0.0588	0.1109	0.0538	0.0361	0.0428	-0.0027	0.1087	0.1303	0.0472	0.1161	0.0626	0.0975	0.2436	0.1042	0.0574	0.187	0.1101	0.1259	-0.0032	0.0982	0.2742	West Prawle Wood A (GB Clone 138)
231		West Wood	0.1204	0.2587	0.0966	0.167	0.1258	0.1073	0.1691	0.1176	0.0301	0.0453	0.0941	0.1678	0.1253	0.203	0.037	0.1945	0.1062	0.0436	0.0608	0.0896	0.1587	-0.0282	0.018	0.0443	0.1182	0.1092	0.1452	0.0107	0.0061	0.2472	0.1136	0.0991	0.3475	0.119	0.2125	0.0355	0.2549	0.3558	West Wood
232		Weston Common (GB Clone 141)	0.0405	0.1148	0.0224	0.057	0.1272	0.0654	0.1003	0.0988	0.0337	-0.0092	0.0753	0.0493	0.2127	0.1267	-0.1052	0.1644	0.0196	0.1091	0.0707	0.1493	0.0762	0.0118	-0.0148	0.0831	0.1039	0.0701	0.1499	0.0999	0.0199	0.2334	0.1079	0.0893	0.335	0.1718	0.1934	0.001	0.2683	0.2531	Weston Common (GB Clone 141)
233		Whitecroft	0.0439	0.247	0.0985	0.138	0.1004	0.1682	0.1251	0.1065	0.084	0.1099	0.1179	0.1063	0.176	0.1595	0.0208	0.2169	0.0831	0.0795	0.0529	-0.0556	0.1066	-0.1538	-0.0501	0.0188	0.0356	0.0927	0.0991	-0.0206	0.0032	0.2477	0.0917	0.1005	0.3668	0.138	0.1795	-0.0249	0.2337	0.3038	Whitecroft
234		Whorley Pin Plantation A (GB Clone 142)	0.0866	0.2422	0.1399	0.1425	0.1143	0.1276	0.184	0.154	0.1132	0.1271	0.1607	0.1629	0.1674	0.2203	0.0858	0.2146	0.1343	0.1457	0.0461	0.1494	0.0807	0.0223	0.0777	0.0833	0.1512	0.1403	0.1367	0.0416	0.071	0.2829	0.1636	0.1281	0.3532	0.2148	0.2218	0.0406	0.3065	0.2843	Whorley Pin Plantation A (GB Clone 142)
235		Wickhill Hanger (GB Clone 144)	0.0144	0.1762	0.0656	0.1241	0.0358	0.0913	0.0685	0.0988	-0.0689	0.0028	0.0623	0.1203	0.1575	0.141	-0.0661	0.1644	0.0159	-0.0208	0.0059	0.0859	0.0986	-0.0982	-0.0016	-0.0032	0.0332	0.0701	0.112	0.0106	-0.0413	0.2583	0.0635	0.0332	0.3459	0.1177	0.1181	-0.0194	0.254	0.2376	Wickhill Hanger (GB Clone 144)
236		Wilderness Wood 1 (GB Clone 145)	0.0825	0.2092	0.0899	0.0991	0.0778	0.1262	0.1009	0.1044	0.0724	0.097	0.1433	0.1222	0.1368	0.1452	0.0377	0.1737	0.0861	0.1014	0.0581	0.0565	0.0717	-0.0069	0.007	0.1045	0.0737	0.0799	0.0639	0.0446	0.0382	0.2328	0.0872	0.0305	0.3317	0.1504	0.1198	0.0577	0.242	0.2479	Wilderness Wood 1 (GB Clone 145)
237		Wimberry Slade	0.0999	0.1719	0.0758	0.1963	0.1417	0.1086	0.0277	0.1453	0.0977	0.0831	0.1141	0.1939	0.2204	0.141	0.0757	0.1798	0.0083	0.1026	0.1017	0.113	0.1164	0.0986	-0.0216	0.1033	0.0902	0.0304	0.1791	0.1202	0.0387	0.2001	0.0776	0.0144	0.2532	0.1024	0.1582	-0.0247	0.1113	0.1794	Wimberry Slade
238		Windmill Plantation (GB Clone 147)	-0.0274	0.0766	0.0224	0.1434	0.1212	0.0785	0.0787	0.1058	0.0942	0.106	0.109	0.124	0.186	0.1004	0.0851	0.1296	0.0121	0.1251	0.0671	-0.0391	0.15	-0.0843	-0.0082	0.023	-0.0907	0.0566	0.0483	0.0328	0.0439	0.0417	0.0024	0.0454	0.2929	0.1202	0.1582	-0.0194	0.1736	0.1794	Windmill Plantation (GB Clone 147)
239		Windsor - Buttersteep	-0.0131	0.1741	0.0109	0.0297	0.0772	0.0785	0.0867	-0.0336	0.0377	0.0336	0.0916	0.0275	0.1393	0.1193	-0.0475	0.1779	0.0196	0.0649	0.0059	0.005	0.0487	-0.0889	-0.1263	0.0398	0.0196	0.0136	0.0433	-0.0313	-0.0382	0.1798	0.0776	0.0079	0.3237	0.1126	0.1596	-0.092	0.2036	0.247	Windsor - Buttersteep
240		Woodbury Hill (GB Clone 148)	0.0177	0.1762	0.0656	0.1175	0.057	0.1061	0.1371	0.0882	0.087	0.0625	0.1124	0.152	0.1575	0.1845	0.0363	0.1928	0.0825	0.1494	0.014	0.0621	0.0646	-0.0156	-0.0567	0.0697	0.0822	0.0776	0.0871	0.0423	0.0199	0.2163	0.0897	0.0514	0.3594	0.1673	0.1596	-0.0091	0.2647	0.2376	Woodbury Hill (GB Clone 148)
241		Worrall Hill	0.1774	0.2416	0.1917	0.115	0.1939	0.1766	0.1233	0.1065	0.1548	0.1465	0.2029	0.1176	0.2166	0.0387	0.1745	0.2321	0.0309	0.1927	0.1983	0.2132	0.2759	0.1643	0.1543	0.1657	0.2025	0.0909	0.318	0.1973	0.1257	0.2827	0.1017	0.1023	0.3397	0.1404	0.1154	0.0843	0.2219	0.332	Worrall Hill
242		Writtlepark Wood	0.1407	0.2592	0.14	0.1598	0.0973	0.1745	0.1701	0.11	0.1124	0.1162	0.1424	0.1393	0.1955	0.1762	0.0812	0.2485	0.1239	0.1413	0.064	0.0893	0.1445	0.0417	0.0241	0.0719	0.136	0.136	0.2245	0.0789	0.0255	0.2649	0.1164	0.0987	0.3754	0.1208	0.0586	0.0208	0.3009	0.2641	Writtlepark Wood
243		Wyatt Wood (GB Clone 149)	0.1082	0.2405	0.1501	0.1588	0.1091	0.1182	0.1209	0.1325	0.1115	0.1599	0.1191	0.124	0.1575	0.1515	0.1077	0.1011	0.0625	0.1464	0.1149	0.1115	0.193	0.0759	0.036	0.0905	0.1134	0.072	0.1696	-0.0125	0.028	0.2409	0.0599	0.0983	0.2431	0.0014	0.1567	0.0254	0.16	0.2935	Wyatt Wood (GB Clone 149)
244		Wymondley Bury	0.1925	0.2581	0.226	0.2332	0.1474	0.1501	0.2024	0.2303	0.0977	0.1898	0.1783	0.2374	0.2101	0.1683	0.2228	0.1928	0.0451	0.2148	0.1835	0.2467	0.2948	0.2097	0.1481	0.1509	0.1893	0.0942	0.3246	0.1813	0.1316	0.2303	0.1079	0.1441	0.0435	0.0866	0.168	0.0794	0.2238	0.2501	Wymondley Bury
245		Wytham Wood (GB Clone 150)	0.1622	0.2615	0.1393	0.1465	0.0706	0.1367	0.1173	0.0988	0.0173	0.0963	0.0623	0.0979	0.1662	0.0847	0.0363	0.2295	-0.0112	-0.0251	0.0413	0.0702	0.2073	-0.0116	0.0049	-0.0781	0.0008	0.0663	0.2883	0.063	0.0032	0.2099	0.0617	0.0838	0.211	0.0839	0.1243	0.0395	0.1736	0.2279	Wytham Wood (GB Clone 150)
			PT01	PT02	PT03	SP01	SP02	SP03	SP04	SP05	SP06	SP07	SP08	SP09	SP10	SP11	SP12	SP13	SP14	SP15	SP16	SP17	FR01	FR02	FR03	IT01	IT02	IT03	IT04	IT05	IT06	IT07	IT08	IT09	SK02	SK03	HU01	RO01	RO02	RO03
		EurEng Group C or D	D	D	D	D	C	D	D	D	C	D	C	D	C	D	C	D	D	C	C	C	C	C	C	C	D	C	C	C	D	D	D	D	C	D	D	C	C	D
Fst using ENA
6 SSR		PT01	PT01	PT02	PT03	SP01	SP02	SP03	SP04	SP05	SP06	SP07	SP08	SP09	SP10	SP11	SP12	SP13	SP14	SP15	SP16	SP17	FR01	FR02	FR03	IT01	IT02	IT03	IT04	IT05	IT06	IT07	IT08	IT09	SK02	SK03	HU01	RO01	RO02	RO03	ENGLAND	IRELAND	WALES
41 pops		PT02	0.071273
		PT03	0.043814	0.071276
		SP01	0.160987	0.232227	0.179234
		SP02	0.136154	0.209966	0.131433	0.148417
		SP03	0.096258	0.124013	0.092321	0.190535	0.170084
		SP04	0.148673	0.195021	0.135844	0.186047	0.15806	0.097594
		SP05	0.145768	0.205302	0.137455	0.028052	0.107933	0.163538	0.171331
		SP06	0.127478	0.20145	0.111217	0.165716	0.096679	0.10846	0.147051	0.149028
		SP07	0.094612	0.142252	0.058398	0.144031	0.112357	0.09813	0.148545	0.109645	0.071567
		SP08	0.135465	0.169983	0.100208	0.20207	0.147846	0.043293	0.10541	0.171522	0.109686	0.098014
		SP09	0.188147	0.257202	0.205805	-0.007257	0.167075	0.228202	0.200582	0.052213	0.207916	0.179065	0.227036
		SP10	0.186284	0.244878	0.159853	0.191544	0.047649	0.187095	0.192092	0.151584	0.130366	0.133661	0.166447	0.215326
		SP11	0.15116	0.175785	0.143557	0.126882	0.134631	0.166459	0.151811	0.110452	0.131636	0.12174	0.175368	0.135931	0.169729
		SP12	0.106771	0.184766	0.082326	0.107018	0.108921	0.147952	0.158459	0.098703	0.103676	0.058462	0.13435	0.131179	0.186235	0.154559
		SP13	0.117584	0.136477	0.112961	0.235763	0.173402	0.048218	0.122975	0.20044	0.152778	0.152933	0.107485	0.265251	0.201226	0.191776	0.179262
		SP14	0.12951	0.183818	0.121499	0.12507	0.092324	0.118444	0.129716	0.108711	0.053781	0.076046	0.128695	0.142703	0.137025	0.063152	0.105875	0.142966
		SP15	0.148029	0.235898	0.129749	0.166917	0.101171	0.144116	0.153673	0.142088	0.020739	0.10446	0.140672	0.19412	0.130168	0.138325	0.101429	0.181074	0.073941
		SP16	0.138431	0.229841	0.122283	0.168691	0.016299	0.175289	0.162491	0.119222	0.115901	0.111389	0.156715	0.176113	0.10243	0.178042	0.090341	0.202327	0.11131	0.106092
		SP17	0.122029	0.199811	0.094556	0.205943	0.146233	0.156914	0.154048	0.159335	0.159069	0.133474	0.137084	0.217491	0.178212	0.172195	0.121493	0.154249	0.147426	0.13959	0.144589
		FR01	0.109266	0.212907	0.102109	0.218929	0.141471	0.151949	0.181997	0.180284	0.136491	0.113154	0.156069	0.250188	0.186744	0.207498	0.093983	0.159377	0.143299	0.138118	0.124363	0.118381
		FR02	0.094408	0.210202	0.092289	0.153363	0.084591	0.138802	0.120939	0.129138	0.094912	0.103024	0.113039	0.164971	0.143663	0.14927	0.062091	0.153476	0.108263	0.089131	0.066945	0.058351	0.097223
		FR03	0.088359	0.180478	0.056835	0.156269	0.106757	0.110584	0.1258	0.119538	0.085435	0.089828	0.097853	0.184135	0.148693	0.146154	0.075251	0.124506	0.098049	0.085699	0.105196	0.037259	0.067002	0.037861
		IT01	0.136408	0.205409	0.138895	0.185327	0.092083	0.165181	0.162933	0.15176	0.137535	0.134964	0.142573	0.16004	0.147505	0.154967	0.118321	0.178063	0.113399	0.106209	0.065159	0.128431	0.147775	0.079777	0.111588
		IT02	0.116021	0.168652	0.110275	0.209044	0.129025	0.159905	0.145216	0.176682	0.138518	0.163527	0.147617	0.20715	0.171484	0.169724	0.155835	0.161301	0.143614	0.130145	0.135709	0.1144	0.180577	0.091374	0.092624	0.079643
		IT03	0.113248	0.15515	0.089696	0.161474	0.107025	0.10632	0.107818	0.120787	0.101206	0.08877	0.090712	0.171939	0.117943	0.112942	0.114766	0.109844	0.080016	0.111127	0.117737	0.118086	0.116279	0.101667	0.065787	0.093098	0.088851
		IT04	0.119475	0.205692	0.102927	0.25671	0.193492	0.159261	0.1923	0.212394	0.191322	0.157717	0.16596	0.291725	0.219411	0.244926	0.155663	0.161344	0.201218	0.203044	0.186861	0.137769	0.112339	0.121582	0.103759	0.208021	0.155474	0.136321
		IT05	0.075269	0.197703	0.107651	0.161501	0.105599	0.133148	0.148899	0.134421	0.135626	0.126689	0.13213	0.162223	0.138795	0.1635	0.107252	0.132008	0.129488	0.119323	0.097533	0.087327	0.096294	0.058125	0.05502	0.070617	0.100355	0.082944	0.112508
		IT06	0.113667	0.179529	0.110545	0.128196	0.083938	0.127228	0.09453	0.100535	0.117384	0.108142	0.105493	0.122886	0.107043	0.121799	0.100165	0.163483	0.113394	0.106042	0.078143	0.120526	0.150843	0.060193	0.068357	0.064214	0.088404	0.071631	0.168208	0.062822
		IT07	0.160163	0.159523	0.134955	0.241583	0.219487	0.152274	0.190557	0.211698	0.236584	0.185341	0.137858	0.250553	0.21608	0.214539	0.247841	0.185591	0.20672	0.247078	0.229093	0.174495	0.269724	0.199753	0.172069	0.18614	0.116567	0.147867	0.209277	0.181775	0.142316
		IT08	0.118308	0.140617	0.09934	0.159618	0.142794	0.101673	0.094917	0.141217	0.145635	0.123123	0.093045	0.165329	0.156852	0.124509	0.145771	0.120499	0.117423	0.147794	0.161854	0.117986	0.180777	0.110235	0.086824	0.11853	0.095743	0.078957	0.147025	0.086243	0.05249	0.080712
		IT09	0.127244	0.174959	0.095063	0.166306	0.115626	0.114246	0.111235	0.124909	0.08041	0.097724	0.12065	0.188238	0.130555	0.128397	0.127345	0.12009	0.095757	0.092246	0.123103	0.122041	0.114143	0.105124	0.062442	0.112941	0.087382	0.036227	0.134214	0.098492	0.077974	0.163651	0.086481
		SK02	0.289029	0.314357	0.240569	0.319717	0.229444	0.235752	0.258742	0.296625	0.202733	0.234537	0.229613	0.336158	0.26437	0.22757	0.27444	0.227975	0.159038	0.248048	0.260546	0.249478	0.294908	0.248382	0.225096	0.231236	0.260863	0.165011	0.314255	0.246239	0.244948	0.29577	0.216039	0.219905
		SK03	0.176819	0.220261	0.143526	0.195283	0.136474	0.16035	0.118856	0.163391	0.15091	0.147993	0.148485	0.207738	0.165185	0.136615	0.189386	0.149285	0.130449	0.16761	0.165897	0.132255	0.21061	0.132413	0.101305	0.149438	0.164242	0.111308	0.218975	0.102432	0.091053	0.192048	0.071399	0.121243	0.16445
		HU01	0.184755	0.214048	0.15129	0.173896	0.13353	0.187464	0.156054	0.160898	0.133619	0.168117	0.160365	0.197593	0.166834	0.1268	0.193281	0.202572	0.154162	0.157564	0.17357	0.187374	0.223628	0.159232	0.123092	0.185387	0.163257	0.135881	0.236573	0.163306	0.122292	0.215423	0.113982	0.114166	0.267754	0.102295
		RO01	0.048577	0.159057	0.067483	0.136191	0.091914	0.102267	0.118832	0.112103	0.086338	0.079239	0.109281	0.149518	0.138805	0.119022	0.071156	0.120999	0.067545	0.09878	0.07114	0.098843	0.064508	0.055171	0.043732	0.068433	0.116179	0.055861	0.139688	0.050241	0.060182	0.174539	0.10331	0.075119	0.188119	0.112763	0.155978
		RO02	0.191585	0.226389	0.144844	0.258706	0.212838	0.162041	0.179021	0.2323	0.173772	0.192549	0.163047	0.294468	0.227009	0.185088	0.201814	0.128213	0.149194	0.161673	0.240832	0.140305	0.181196	0.183385	0.103773	0.202596	0.207119	0.109858	0.220359	0.152349	0.199331	0.256611	0.149292	0.138085	0.197803	0.141837	0.1907	0.135174
		RO03	0.19488	0.224039	0.230298	0.269366	0.241539	0.239025	0.240992	0.258063	0.267402	0.274504	0.267863	0.280668	0.298394	0.262941	0.272327	0.266229	0.230862	0.265766	0.250611	0.28668	0.310102	0.258751	0.251998	0.217684	0.158585	0.208786	0.304437	0.24366	0.196881	0.209284	0.196029	0.196793	0.372199	0.29822	0.255737	0.203211	0.342101
		ENGLAND	0.063659	0.136186	0.040601	0.137144	0.083343	0.086429	0.107151	0.10408	0.065997	0.051002	0.083294	0.157236	0.111131	0.113563	0.044465	0.098816	0.070679	0.070042	0.078342	0.053213	0.048553	0.031057	0.01304	0.092942	0.089109	0.055899	0.066717	0.056841	0.079796	0.148493	0.089519	0.060245	0.163003	0.112875	0.13432	0.03516	0.100663	0.211912
		IRELAND	0.063041	0.153111	0.048912	0.124765	0.080437	0.089563	0.115461	0.092926	0.063881	0.056443	0.094544	0.152461	0.108478	0.11612	0.043396	0.104821	0.085207	0.065486	0.07818	0.064357	0.046265	0.018679	0.022389	0.097587	0.094547	0.070936	0.079065	0.053559	0.076755	0.173125	0.103798	0.063459	0.20543	0.124509	0.139546	0.039993	0.126701	0.224932	0.007823
		WALES	0.075085	0.142027	0.049024	0.144898	0.104967	0.082641	0.116969	0.118595	0.06011	0.059556	0.084934	0.172233	0.128804	0.109931	0.055952	0.105518	0.064357	0.06213	0.103391	0.065265	0.067889	0.043506	0.025748	0.106296	0.100025	0.066817	0.091802	0.075672	0.100073	0.16245	0.095201	0.070245	0.177287	0.127304	0.143097	0.044507	0.087541	0.229611	0.004663	0.016205
			PT01	PT02	PT03	SP01	SP02	SP03	SP04	SP05	SP06	SP07	SP08	SP09	SP10	SP11	SP12	SP13	SP14	SP15	SP16	SP17	FR01	FR02	FR03	IT01	IT02	IT03	IT04	IT05	IT06	IT07	IT08	IT09	SK02	SK03	HU01	RO01	RO02	RO03	ENGLAND	IRELAND	WALES
		EurEng Group C or D	D	D	D	D	C	D	D	D	C	D	C	D	C	D	C	D	D	C	C	C	C	C	C	C	D	C	C	C	D	D	D	D	C	D	D	C	C	D

## Sheet: 10%ile 90%ile
admin counties 6 SSR 63 1294
39	Berks	39	0.0657	0.1347	0.0373	0.1251	0.0736	0.0952	0.105	0.0965	0.0752	0.0374	0.0852	0.1539	0.0965	0.1094	0.0539	0.1214	0.0653	0.076	0.0814	0.0557	0.0661	0.0469	0.0252	0.0901	0.0912	0.0464	0.0975	0.066	0.0692	0.1552	0.0744	0.0453	0.2142	0.1154	0.1218	0.0479	0.1405	0.2245	Berks
40	Caerphilly	40	0.0756	0.147	0.0644	0.1461	0.0868	0.0707	0.1127	0.1396	0.0256	0.0556	0.0601	0.1871	0.117	0.0981	0.0744	0.0947	0.0238	0.0424	0.1196	0.0737	0.0711	0.0712	0.0198	0.1047	0.1212	0.0596	0.1481	0.0899	0.1171	0.1906	0.0825	0.0662	0.1724	0.1089	0.1128	0.0483	0.0575	0.2527	Caerphilly
41	Cork	41	0.0846	0.2076	0.0971	0.143	0.094	0.1114	0.1633	0.1294	0.0827	0.0776	0.1156	0.1814	0.1368	0.1845	0.0602	0.1537	0.1309	0.0921	0.0892	0.1174	0.055	0.0428	0.0744	0.1102	0.1585	0.1286	0.143	0.0641	0.0951	0.2582	0.1602	0.1173	0.2982	0.1743	0.1913	0.0607	0.2372	0.2977	Cork
42	Cornwall	42	0.0582	0.1396	0.0448	0.1249	0.0911	0.0979	0.1175	0.1166	0.0533	0.0438	0.0968	0.1576	0.1308	0.1185	0.0306	0.1201	0.0652	0.0629	0.0947	0.0777	0.0437	0.0376	0.0313	0.1013	0.089	0.0643	0.078	0.0662	0.0786	0.183	0.0855	0.0503	0.2248	0.1369	0.1354	0.0455	0.148	0.223	Cornwall
43	Devon	43	0.0651	0.1627	0.0542	0.1478	0.0971	0.1186	0.1409	0.1314	0.0807	0.0617	0.11	0.1823	0.128	0.151	0.0547	0.134	0.0942	0.0889	0.1004	0.0689	0.0553	0.0387	0.0307	0.1133	0.1079	0.0732	0.0741	0.0696	0.0983	0.1885	0.1129	0.075	0.214	0.1481	0.1665	0.0511	0.1605	0.2515	Devon
44	E Sussex	44	0.0631	0.1492	0.0552	0.114	0.0734	0.1159	0.1161	0.1043	0.0894	0.0642	0.1022	0.1234	0.1179	0.1132	0.0456	0.1225	0.0599	0.0857	0.0612	0.0823	0.0556	0.0363	0.021	0.0606	0.0932	0.0465	0.0948	0.0392	0.0438	0.1734	0.0726	0.0579	0.2139	0.1135	0.1289	0.0204	0.1517	0.2118	E Sussex
45	Essex	45	0.065	0.138	0.0451	0.1454	0.0812	0.0838	0.1091	0.1202	0.0754	0.0601	0.0806	0.1727	0.1203	0.1301	0.0489	0.0903	0.0686	0.0698	0.0899	0.0624	0.0499	0.0519	0.0222	0.0877	0.1048	0.0606	0.0889	0.0574	0.0797	0.1751	0.0887	0.0697	0.1666	0.1099	0.143	0.0304	0.1101	0.2179	Essex
46	Glos	46	0.0642	0.1405	0.0391	0.1437	0.0802	0.0954	0.1141	0.1197	0.0647	0.0509	0.0835	0.1707	0.1136	0.1357	0.045	0.1026	0.0744	0.0694	0.0818	0.0541	0.0485	0.0375	0.0183	0.0922	0.0922	0.0612	0.0699	0.0607	0.0817	0.1627	0.0981	0.0633	0.1644	0.1165	0.1429	0.0358	0.1238	0.2245	Glos
47	Hants	47	0.0559	0.1322	0.042	0.1082	0.0698	0.1044	0.1064	0.1067	0.0569	0.0468	0.0847	0.1149	0.123	0.1204	0.0207	0.1103	0.0564	0.0634	0.0637	0.0491	0.0673	0.0103	0.0127	0.0259	0.05	0.0307	0.1138	0.0424	0.0312	0.1692	0.0705	0.0471	0.2219	0.1131	0.1372	0.0098	0.1632	0.213	Hants
48	Herefs	48	0.0866	0.1684	0.0555	0.1709	0.1225	0.1156	0.1437	0.1506	0.0769	0.0676	0.1058	0.2105	0.1458	0.1489	0.0651	0.1281	0.0838	0.0791	0.1294	0.0731	0.0573	0.0695	0.0306	0.1368	0.1286	0.0759	0.0948	0.101	0.131	0.2042	0.1312	0.0758	0.2003	0.1571	0.1756	0.0545	0.1138	0.2732	Herefs
49	Kent	49	0.0566	0.1415	0.0459	0.145	0.0807	0.0919	0.1178	0.128	0.0616	0.0446	0.0817	0.1769	0.1134	0.1373	0.0448	0.0987	0.0729	0.0744	0.0866	0.0721	0.0459	0.051	0.027	0.099	0.1112	0.0607	0.0722	0.0547	0.089	0.1768	0.0978	0.0671	0.177	0.1188	0.1427	0.0385	0.1234	0.2373	Kent
50	Kerry	50	0.0574	0.1451	0.0243	0.1443	0.1032	0.093	0.1201	0.1177	0.061	0.0385	0.0854	0.1844	0.1309	0.1411	0.0194	0.1058	0.076	0.0722	0.1087	0.0542	0.0476	0.0314	-0.0013	0.1192	0.1079	0.0566	0.0649	0.0653	0.092	0.1939	0.0975	0.0626	0.2116	0.1258	0.159	0.0325	0.1106	0.2681	Kerry
51	Mon	51	0.0812	0.166	0.0575	0.1655	0.1196	0.1097	0.1447	0.1471	0.0744	0.0707	0.0975	0.1967	0.1543	0.1551	0.0467	0.1323	0.0914	0.0648	0.1192	0.0659	0.0718	0.0479	0.0363	0.1145	0.1167	0.0941	0.1013	0.0856	0.1209	0.2055	0.1262	0.0938	0.2188	0.1592	0.177	0.0581	0.1279	0.2719	Mon
52	Norfolk	52	0.0403	0.1248	0.0248	0.155	0.0818	0.1019	0.1214	0.1421	0.0839	0.0354	0.0768	0.1761	0.1239	0.146	0.0427	0.1066	0.0726	0.1097	0.0884	0.0637	0.072	0.0317	0.0357	0.0992	0.0907	0.0653	0.0655	0.063	0.0867	0.1492	0.0791	0.0868	0.2172	0.1322	0.1628	0.0425	0.1759	0.2431	Norfolk
53	Powys	53	0.0657	0.1332	0.0359	0.1409	0.0804	0.077	0.116	0.122	0.062	0.0467	0.0691	0.1643	0.1012	0.1353	0.0514	0.1167	0.0617	0.0622	0.0705	0.0719	0.0575	0.0535	0.0213	0.0732	0.0846	0.0627	0.0966	0.059	0.0673	0.1401	0.0689	0.0681	0.2233	0.1362	0.142	0.0293	0.1415	0.2085	Powys
54	Shrops	54	0.0519	0.1555	0.0322	0.0905	0.075	0.0994	0.1008	0.0923	0.0416	0.0271	0.0648	0.1197	0.1057	0.1178	0.0142	0.1222	0.0664	0.0569	0.0767	0.0304	0.0637	-0.0172	-0.0244	0.0853	0.08	0.041	0.0662	0.0382	0.0366	0.1687	0.057	0.0301	0.2284	0.0856	0.0941	0.025	0.1298	0.2525	Shrops
55	Som	55	0.0726	0.1714	0.0682	0.1635	0.0981	0.1157	0.1383	0.1445	0.0856	0.078	0.0986	0.1875	0.1468	0.1878	0.0642	0.1452	0.1172	0.0882	0.0859	0.0893	0.0701	0.0501	0.0453	0.1053	0.0922	0.1137	0.0733	0.064	0.0786	0.1791	0.1098	0.0933	0.2896	0.1677	0.1588	0.0624	0.2258	0.231	Som
56	Suff	56	0.0638	0.1755	0.0488	0.1557	0.0866	0.1144	0.1327	0.1359	0.0794	0.0556	0.0931	0.1791	0.1222	0.1584	0.0321	0.1333	0.0894	0.07	0.078	0.0536	0.0208	0.0285	0.0137	0.0851	0.104	0.0665	0.0742	0.0455	0.0871	0.2065	0.1158	0.0686	0.2354	0.1499	0.1726	0.0292	0.1447	0.2631	Suff
57	Surrey	57	0.0842	0.1563	0.0365	0.1526	0.1121	0.1139	0.1439	0.131	0.0669	0.0522	0.0935	0.1862	0.1408	0.1336	0.0397	0.1342	0.0713	0.0674	0.1168	0.0675	0.0558	0.0643	-0.0001	0.1255	0.1301	0.0676	0.1072	0.0955	0.1045	0.1994	0.1107	0.0746	0.2005	0.14	0.1497	0.0338	0.1015	0.2657	Surrey
58	Tipp	58	0.1083	0.228	0.1011	0.1549	0.1015	0.1699	0.1309	0.1334	0.0911	0.1008	0.1337	0.1775	0.1259	0.1213	0.1062	0.1787	0.0979	0.0816	0.1249	0.0885	0.1312	0.0419	0.0617	0.1171	0.0817	0.0811	0.1473	0.0738	0.0929	0.2052	0.1014	0.0732	0.2911	0.131	0.1264	0.0948	0.1949	0.2764	Tipp
59	W Sussex	59	0.074	0.1604	0.0544	0.1421	0.0868	0.1119	0.133	0.1228	0.0753	0.0486	0.0888	0.1625	0.1416	0.1458	0.0217	0.1344	0.0773	0.0837	0.0767	0.0721	0.0476	0.0273	0.0301	0.0844	0.115	0.0808	0.0928	0.0562	0.0728	0.2017	0.1067	0.0949	0.2161	0.1382	0.1645	0.0388	0.1751	0.248	W Sussex
60	Waterford	60	0.0553	0.1424	0.04	0.1301	0.0887	0.09	0.1202	0.1177	0.0664	0.0569	0.0973	0.167	0.1315	0.142	0.0365	0.1085	0.0815	0.0762	0.086	0.0784	0.0431	0.0283	0.034	0.104	0.1022	0.0777	0.0784	0.0726	0.0824	0.2018	0.1161	0.0614	0.2245	0.1478	0.1571	0.0322	0.159	0.2305	Waterford
61	Wight	61	0.043	0.1239	0.0337	0.1339	0.0761	0.0789	0.0967	0.1209	0.0654	0.0394	0.063	0.1619	0.1195	0.1177	0.0271	0.0973	0.0651	0.0729	0.0764	0.0698	0.0331	0.041	0.0226	0.0702	0.0857	0.05	0.0903	0.0452	0.08	0.1644	0.074	0.0582	0.2247	0.1302	0.1287	0.0219	0.1177	0.2195	Wight
62	Wilts	62	0.0586	0.1538	0.0367	0.1432	0.0667	0.1105	0.1404	0.1232	0.0827	0.0491	0.0842	0.1691	0.1004	0.1635	0.0422	0.1391	0.1008	0.0828	0.0571	0.0646	0.061	0.0224	0.0154	0.0826	0.0959	0.0712	0.0922	0.061	0.0782	0.1713	0.1046	0.072	0.2504	0.1524	0.1527	0.0376	0.1666	0.2472	Wilts
63	Worcs	63	0.0557	0.1635	0.0579	0.1367	0.0922	0.1082	0.1217	0.1172	0.1016	0.0737	0.0945	0.1755	0.1369	0.1546	0.0513	0.1236	0.0981	0.1236	0.0973	0.0636	0.0528	0.0388	0.0155	0.118	0.1117	0.0687	0.0744	0.0518	0.0868	0.2009	0.0967	0.0703	0.2581	0.1364	0.1468	0.0459	0.1533	0.2603	Worcs
		pop	PT01	PT02	PT03	SP01	SP02	SP03	SP04	SP05	SP06	SP07	SP08	SP09	SP10	SP11	SP12	SP13	SP14	SP15	SP16	SP17	FR01	FR02	FR03	IT01	IT02	IT03	IT04	IT05	IT06	IT07	IT08	IT09	SK02	SK03	HU01	RO01	RO02	RO03
seed zones 6 SSR 47 1327
	303	39	0.0634	0.122	0.0553	0.1554	0.1041	0.0541	0.1117	0.1424	0.0426	0.0535	0.0643	0.1979	0.1426	0.1099	0.0715	0.0753	0.0309	0.064	0.1245	0.0878	0.0694	0.0786	0.0328	0.1092	0.1217	0.0595	0.1328	0.0976	0.1187	0.1852	0.0914	0.0663	0.1611	0.1236	0.1398	0.0394	0.0731	0.2307	303
	304	40	0.067	0.1048	0.0325	0.1369	0.0855	0.0865	0.1083	0.1183	0.0698	0.026	0.0749	0.1673	0.0949	0.1076	0.0561	0.1059	0.0465	0.0784	0.0975	0.0911	0.0693	0.0896	0.0466	0.0993	0.103	0.04	0.1074	0.0899	0.0851	0.1393	0.0675	0.0534	0.1991	0.1267	0.1323	0.0448	0.1255	0.2084	304
	305	41	0.0586	0.1492	0.0473	0.1378	0.0885	0.1057	0.1272	0.1231	0.0678	0.053	0.0965	0.1696	0.1231	0.1443	0.0434	0.1223	0.0871	0.0742	0.0885	0.0672	0.0455	0.0345	0.0281	0.1032	0.0939	0.0745	0.0637	0.0617	0.0854	0.1732	0.1022	0.067	0.2117	0.1419	0.15	0.0469	0.1581	0.2289	305
	402	42	0.0316	0.1484	0.0379	0.1382	0.0892	0.0858	0.1236	0.1139	0.0751	0.0685	0.0942	0.1648	0.1306	0.1428	0.0544	0.1136	0.0966	0.078	0.0801	0.0252	0.0693	-0.0114	0.0182	0.0885	0.0676	0.0893	0.0658	0.041	0.0822	0.1614	0.0978	0.0712	0.2617	0.1379	0.1569	0.0311	0.1651	0.2496	402
	403	43	0.0692	0.159	0.0446	0.1502	0.1055	0.1073	0.1339	0.1299	0.0761	0.0596	0.0962	0.1855	0.1321	0.1488	0.0531	0.1214	0.0904	0.0802	0.104	0.062	0.0534	0.0408	0.0197	0.1172	0.1084	0.0768	0.0717	0.0747	0.1025	0.1781	0.1154	0.0728	0.2011	0.1418	0.1632	0.0436	0.1342	0.253	403
	404	44	0.0646	0.1401	0.0397	0.1447	0.082	0.0945	0.1148	0.122	0.0645	0.0511	0.0818	0.172	0.1161	0.1358	0.0429	0.1033	0.0747	0.0672	0.0839	0.0544	0.0484	0.038	0.0197	0.0923	0.093	0.0633	0.0732	0.0629	0.0866	0.1652	0.1004	0.0654	0.1674	0.1215	0.1441	0.0378	0.1205	0.2259	404
	405	45	0.0593	0.1337	0.0403	0.1346	0.0781	0.0907	0.1124	0.1156	0.0662	0.0448	0.0791	0.1621	0.1123	0.1279	0.0385	0.0984	0.068	0.0712	0.0811	0.0618	0.0426	0.0446	0.0204	0.0892	0.1025	0.0569	0.0736	0.0551	0.0792	0.1652	0.092	0.0646	0.1672	0.115	0.1374	0.0329	0.1197	0.2219	405
	406	46	0.0499	0.1513	0.0395	0.1465	0.0745	0.1061	0.1241	0.1333	0.075	0.0434	0.0812	0.1688	0.112	0.1461	0.0355	0.1159	0.0761	0.0789	0.0747	0.0626	0.0412	0.0289	0.0264	0.0839	0.0972	0.0628	0.0763	0.0496	0.0833	0.1776	0.1017	0.0759	0.21	0.1372	0.1629	0.0294	0.1499	0.2429	406
	IRE	47	0.0642	0.1613	0.0497	0.1265	0.08	0.1011	0.1239	0.1075	0.0635	0.0535	0.0939	0.1602	0.1117	0.1379	0.0399	0.1151	0.0896	0.0669	0.0806	0.0705	0.0426	0.0234	0.0274	0.098	0.1034	0.0767	0.0812	0.0551	0.0784	0.1932	0.1151	0.067	0.2168	0.1327	0.1485	0.0416	0.1573	0.2431	IRE
		pop	PT01	PT02	PT03	SP01	SP02	SP03	SP04	SP05	SP06	SP07	SP08	SP09	SP10	SP11	SP12	SP13	SP14	SP15	SP16	SP17	FR01	FR02	FR03	IT01	IT02	IT03	IT04	IT05	IT06	IT07	IT08	IT09	SK02	SK03	HU01	RO01	RO02	RO03
site types 6 SSR 43 1332			top and bottom 10%
	A	39	0.0639	0.147	0.0433	0.1327	0.083	0.1011	0.1219	0.114	0.0701	0.0516	0.0898	0.1618	0.1151	0.1401	0.0396	0.1128	0.0856	0.0727	0.08	0.0604	0.0448	0.0293	0.0222	0.0925	0.0941	0.068	0.0695	0.0576	0.0784	0.1712	0.1037	0.0637	0.1904	0.1299	0.1466	0.0396	0.1422	0.2282	A
	B	40	0.0619	0.1459	0.0511	0.1209	0.0684	0.1021	0.1039	0.1045	0.0732	0.0545	0.0865	0.1455	0.0947	0.1173	0.0524	0.1119	0.0678	0.0706	0.0712	0.0574	0.0534	0.0327	0.0226	0.0769	0.0865	0.0528	0.0823	0.0457	0.0608	0.1576	0.0813	0.0596	0.1878	0.1104	0.127	0.0353	0.1341	0.2131	B
	C	41	0.0634	0.1374	0.0422	0.1507	0.0824	0.0934	0.117	0.1295	0.0657	0.0532	0.0841	0.1803	0.1173	0.1382	0.0482	0.0961	0.0751	0.0759	0.0919	0.0637	0.0503	0.0525	0.0253	0.1031	0.1045	0.0613	0.074	0.0671	0.0943	0.1696	0.1006	0.0665	0.1574	0.1164	0.1424	0.0381	0.114	0.2296	C
	D	42	0.0668	0.1448	0.042	0.152	0.0949	0.0947	0.1249	0.1305	0.0612	0.0464	0.0817	0.1833	0.1286	0.1417	0.0402	0.1084	0.0752	0.0654	0.0958	0.0636	0.0455	0.0466	0.0251	0.1058	0.1104	0.0732	0.0753	0.072	0.1023	0.1782	0.1124	0.0747	0.1801	0.1355	0.1562	0.0444	0.1245	0.2427	D
	E	43	0.0401	0.1038	0.0225	0.1498	0.0968	0.0788	0.1125	0.1298	0.0801	0.0473	0.0781	0.1782	0.1315	0.1226	0.0541	0.0909	0.0661	0.0889	0.1036	0.0676	0.0537	0.064	0.0244	0.1007	0.0945	0.0617	0.0846	0.0739	0.0962	0.1366	0.0807	0.0739	0.1818	0.1305	0.1512	0.0281	0.1143	0.2064	E
		pop	PT01	PT02	PT03	SP01	SP02	SP03	SP04	SP05	SP06	SP07	SP08	SP09	SP10	SP11	SP12	SP13	SP14	SP15	SP16	SP17	FR01	FR02	FR03	IT01	IT02	IT03	IT04	IT05	IT06	IT07	IT08	IT09	SK02	SK03	HU01	RO01	RO02	RO03
Eur with Eng sites >3 (115 sites 6 SSR) Fst Genepop
		77 EngIreWal
			PT01	PT02	PT03	SP01	SP02	SP03	SP04	SP05	SP06	SP07	SP08	SP09	SP10	SP11	SP12	SP13	SP14	SP15	SP16	SP17	FR01	FR02	FR03	IT01	IT02	IT03	IT04	IT05	IT06	IT07	IT08	IT09	SK02	SK03	HU01	RO01	RO02	RO03
		Abbot's Wood Soudley	0.0859	0.1052	0.056	0.1361	0.1402	0.0767	0.0918	0.1045	0.1082	0.0546	0.1074	0.1665	0.1466	0.0614	0.112	0.0931	0.0304	0.1142	0.1538	0.0957	0.1291	0.127	0.0583	0.1152	0.113	0.0097	0.157	0.1069	0.0754	0.1411	0.0299	0.0245	0.2103	0.0834	0.127	0.0461	0.1121	0.227	Abbot's Wood Soudley
		Abenhall hedge	0.1462	0.2295	0.1246	0.2122	0.0992	0.1552	0.1562	0.1844	0.0952	0.1079	0.1165	0.2261	0.116	0.1928	0.097	0.1595	0.0929	0.1331	0.1369	0.0894	0.1146	0.1064	0.0621	0.1383	0.1694	0.0827	0.1777	0.0992	0.113	0.266	0.1311	0.1223	0.2013	0.1197	0.1806	0.088	0.1516	0.3435	Abenhall hedge
		Baldwyns	0.0706	0.1589	0.0871	0.223	0.147	0.0908	0.1402	0.2164	0.1256	0.1046	0.0793	0.257	0.182	0.2103	0.1255	0.1262	0.1423	0.1678	0.1508	0.1339	0.0661	0.1266	0.1044	0.1405	0.1632	0.1374	0.1514	0.1004	0.1605	0.2123	0.1356	0.1419	0.3347	0.1968	0.1953	0.0816	0.2114	0.29	Baldwyns
		Bertholey Park	0.1021	0.1718	0.0823	0.1855	0.1522	0.0938	0.1408	0.1683	0.0663	0.0841	0.1024	0.2268	0.1914	0.1402	0.0707	0.1299	0.0834	0.0564	0.1734	0.0919	0.1129	0.094	0.0684	0.1503	0.1494	0.1092	0.1602	0.1253	0.1589	0.2514	0.1318	0.1031	0.2437	0.1691	0.1698	0.0939	0.0986	0.3049	Bertholey Park
		Bigsweir	0.0957	0.122	0.0382	0.1972	0.1703	0.0892	0.1489	0.1549	0.0903	0.0343	0.1024	0.2417	0.1853	0.1474	0.0632	0.1183	0.0908	0.1032	0.1781	0.1045	0.1116	0.1286	0.0876	0.1633	0.169	0.0823	0.1321	0.1404	0.1597	0.211	0.1177	0.0866	0.253	0.1716	0.187	0.0877	0.1146	0.3224	Bigsweir
		Borthwood Copse	0.0297	0.1131	0.0374	0.1711	0.0848	0.0787	0.0864	0.1583	0.0891	0.0733	0.0829	0.1861	0.1615	0.1623	0.0479	0.1173	0.0797	0.1265	0.0507	0.1139	0.0365	0.0657	0.0444	0.0674	0.0498	0.0695	0.0641	0.0411	0.0713	0.1722	0.0828	0.0664	0.2839	0.1633	0.1412	0.0237	0.19	0.1713	Borthwood Copse
		Brampton Bryan Park	0.0376	0.1093	0.0368	0.1126	0.1148	0.0966	0.0865	0.1032	0.0802	0.0156	0.0977	0.1409	0.1168	0.0532	0.0792	0.1274	0.0195	0.0867	0.1279	0.0679	0.1005	0.0951	0.0429	0.11	0.1013	0.0164	0.1232	0.086	0.0867	0.1326	0.0427	0.0288	0.249	0.1119	0.1224	0.0374	0.1217	0.2384	Brampton Bryan Park
		Bryngwyn Wood A (GB Clone 17)	0.1665	0.2543	0.156	0.2049	0.159	0.1796	0.2108	0.1856	0.1644	0.1623	0.195	0.2188	0.1927	0.2334	0.1393	0.2371	0.152	0.162	0.1149	0.1818	0.1161	0.1315	0.1133	0.1314	0.1818	0.1475	0.1784	0.1075	0.1058	0.2818	0.1602	0.1471	0.3448	0.229	0.2285	0.0983	0.2891	0.2886	Bryngwyn Wood A (GB Clone 17)
		Canford School	0.0226	0.0779	0.0069	0.1652	0.1087	0.0762	0.1048	0.1399	0.0739	0.0538	0.0934	0.1833	0.1723	0.1359	0.0489	0.1062	0.0542	0.119	0.1121	0.0698	0.0753	0.0377	0.0091	0.1097	0.0436	0.0646	0.0529	0.0801	0.0956	0.1582	0.0652	0.0587	0.2328	0.1294	0.149	0.0404	0.1578	0.208	Canford School
		Cappoquin Ho	0.0932	0.1922	0.0515	0.2113	0.1741	0.1424	0.1701	0.1815	0.1506	0.1289	0.1558	0.2386	0.2224	0.1908	0.1001	0.1575	0.1304	0.1412	0.1603	0.0834	0.125	0.0683	0.0406	0.1553	0.1353	0.1102	0.1141	0.1228	0.1367	0.2373	0.1375	0.1026	0.2677	0.1864	0.2113	0.0636	0.149	0.3034	Cappoquin Ho
		Catsash, Wentwood	0.1384	0.2237	0.1042	0.2112	0.1667	0.1723	0.1795	0.1872	0.1383	0.1435	0.1538	0.2291	0.2069	0.1796	0.086	0.1955	0.1241	0.0943	0.1685	0.0691	0.142	0.0829	0.0444	0.1328	0.1338	0.1163	0.1611	0.1049	0.1508	0.2557	0.1224	0.1275	0.278	0.1805	0.1962	0.1011	0.1071	0.3252	Catsash, Wentwood
		Chalkney Wood	0.1131	0.1546	0.0658	0.1975	0.1378	0.0953	0.1422	0.1745	0.0895	0.0694	0.1068	0.2378	0.1683	0.1574	0.0647	0.1285	0.072	0.092	0.1514	0.1135	0.058	0.1296	0.0533	0.1515	0.1799	0.0791	0.159	0.1336	0.1454	0.2583	0.1352	0.0832	0.2139	0.1696	0.1848	0.0651	0.0745	0.2897	Chalkney Wood
		Chestnut Street, Borden	0.071	0.1743	0.0661	0.1685	0.0986	0.1241	0.1543	0.1532	0.0608	0.0623	0.1175	0.1966	0.1492	0.1787	0.0356	0.1309	0.0924	0.0981	0.1057	0.1162	0.0688	0.0727	0.0473	0.1334	0.1502	0.0863	0.0876	0.0679	0.0953	0.2349	0.1268	0.102	0.2154	0.1378	0.1807	0.0492	0.19	0.2886	Chestnut Street, Borden
		Chestnuts Wood	0.0915	0.1333	0.0397	0.2047	0.1485	0.0943	0.1514	0.1762	0.092	0.0637	0.0997	0.2517	0.1792	0.1791	0.0701	0.1143	0.1117	0.1049	0.1593	0.1023	0.0918	0.1136	0.0646	0.1683	0.1452	0.0974	0.1094	0.1412	0.1638	0.2075	0.1393	0.0905	0.2231	0.1817	0.1874	0.0908	0.1183	0.2828	Chestnuts Wood
		Chilham Castle	0.0505	0.1382	0.0312	0.1703	0.1129	0.1053	0.1248	0.1504	0.1094	0.0687	0.1135	0.1991	0.1481	0.1574	0.0731	0.1312	0.1019	0.1167	0.0994	0.0635	0.0569	0.0638	0.0377	0.1181	0.0769	0.0821	0.0101	0.0639	0.1096	0.155	0.0816	0.0546	0.2803	0.1575	0.1598	0.0551	0.1789	0.2371	Chilham Castle
		Clytha	0.0892	0.1637	0.0392	0.173	0.1284	0.0754	0.1256	0.1408	0.0488	0.0408	0.0755	0.2159	0.1819	0.1423	0.0166	0.1263	0.0584	0.0592	0.1225	0.0773	0.0478	0.0657	0.0112	0.139	0.1395	0.0767	0.113	0.1154	0.1324	0.2481	0.1447	0.067	0.23	0.1647	0.1711	0.0502	0.0957	0.2949	Clytha
		Copperas Wood	0.0821	0.1974	0.0624	0.1583	0.123	0.1165	0.1004	0.132	0.1214	0.0928	0.1349	0.17	0.2038	0.153	0.0471	0.1495	0.1023	0.1224	0.1057	0.101	0.0955	0.0505	0.0391	0.1346	0.1142	0.1044	0.0754	0.0783	0.0818	0.2289	0.1176	0.0885	0.2626	0.137	0.173	0.0555	0.2233	0.2511	Copperas Wood
		Cowdray Avenue	0.0381	0.1484	0.0498	0.1081	0.1015	0.0964	0.1193	0.1123	0.0537	0.0495	0.0786	0.1223	0.1674	0.1105	0.0033	0.1302	0.0563	0.0692	0.1133	0.048	0.0736	-0.014	0.0302	0.0826	0.0894	0.0854	0.0843	0.0337	0.0776	0.2033	0.0681	0.0869	0.2626	0.1277	0.136	0.0491	0.1739	0.2608	Cowdray Avenue
		Cowdray Park	0.1002	0.2002	0.0839	0.1673	0.0899	0.1397	0.1401	0.1451	0.0853	0.0646	0.0981	0.1762	0.1554	0.1692	0.0422	0.1644	0.0823	0.0892	0.073	0.0805	0.087	0.0188	0.0454	0.0654	0.1071	0.094	0.1312	0.0638	0.0643	0.2088	0.1121	0.1128	0.2454	0.1454	0.1893	0.0549	0.2198	0.2712	Cowdray Park
		Croft Park	0.0938	0.1762	0.0679	0.1854	0.1591	0.1078	0.1625	0.1656	0.0706	0.0671	0.119	0.2239	0.1964	0.1512	0.0703	0.1449	0.0688	0.0722	0.1514	0.1012	0.062	0.1007	0.0534	0.1386	0.1623	0.0942	0.1371	0.1251	0.1493	0.237	0.1528	0.0927	0.2117	0.1817	0.2113	0.04	0.1289	0.2935	Croft Park
		Daniel's Wood (GB Clone 36)	0.0552	0.1951	0.0795	0.1334	0.0965	0.1255	0.1398	0.1136	0.1072	0.072	0.1287	0.1446	0.116	0.1514	0.0853	0.1596	0.0912	0.1224	0.0778	0.0706	0.0702	0.0175	0.0033	0.0741	0.0681	0.0372	0.0555	-0.0005	0.0381	0.1673	0.0672	0.0281	0.2822	0.1255	0.1547	0.0308	0.2103	0.2412	Daniel's Wood (GB Clone 36)
		Dock Copse, Botley	0.071	0.1351	0.07	0.1504	0.1019	0.1211	0.1074	0.1294	0.0953	0.101	0.1135	0.1431	0.1439	0.1021	0.091	0.0974	0.06	0.1089	0.1136	0.0121	0.1079	0.057	0.026	0.0278	0.0142	-0.0088	0.1467	0.0497	0.0755	0.1437	0.0556	0.0259	0.1998	0.095	0.1251	0.0119	0.1082	0.2163	Dock Copse, Botley
		Edgehills	0.068	0.1341	0.0682	0.143	0.0949	0.1247	0.0628	0.1151	0.1254	0.1127	0.121	0.1493	0.1479	0.1137	0.097	0.1339	0.0566	0.1134	0.0955	0.0656	0.1507	0.044	0.0545	0.0674	0.0733	0.0717	0.189	0.0914	0.0653	0.1616	0.0568	0.094	0.2149	0.0876	0.1434	0.0154	0.1367	0.2019	Edgehills
		Edlington Wood	0.1137	0.2171	0.1268	0.1573	0.1138	0.1879	0.1369	0.1366	0.1413	0.1162	0.158	0.152	0.1497	0.1454	0.1138	0.2275	0.1114	0.1284	0.1079	0.1222	0.1568	0.0619	0.0785	0.069	0.0572	0.0678	0.1649	0.0732	0.0224	0.1952	0.0848	0.0621	0.3346	0.1632	0.1712	0.0763	0.2806	0.2188	Edlington Wood
		Ellwood	0.0907	0.2129	0.0902	0.1633	0.1136	0.1546	0.1788	0.1495	0.1054	0.1053	0.152	0.1768	0.1684	0.2126	0.0757	0.1868	0.135	0.1157	0.0686	0.1179	0.0986	0.0168	0.0334	0.0802	0.1018	0.1133	0.0886	0.0434	0.0443	0.231	0.1267	0.0974	0.2983	0.1664	0.1939	0.0481	0.2652	0.2618	Ellwood
		Felbridge avenues	0.0774	0.1609	0.0341	0.1496	0.0905	0.0947	0.1288	0.1225	0.0364	0.0409	0.0721	0.1803	0.1263	0.1361	0.0179	0.1108	0.0585	0.0387	0.0984	0.0619	0.0554	0.028	-0.0063	0.1025	0.1112	0.0644	0.0962	0.0679	0.0897	0.2074	0.1044	0.0766	0.2062	0.1219	0.1538	0.0392	0.1174	0.275	Felbridge avenues
		Flaxley Wood/Picks Copse	0.1034	0.2121	0.0927	0.1738	0.1082	0.1419	0.151	0.1602	0.1221	0.1085	0.1293	0.197	0.152	0.208	0.0764	0.1495	0.1313	0.1293	0.1011	0.1149	0.0771	0.0718	0.0443	0.133	0.1523	0.1167	0.1152	0.0774	0.0772	0.2415	0.1451	0.1118	0.2855	0.1602	0.1874	0.0523	0.2172	0.295	Flaxley Wood/Picks Copse
		Flesk Wood	0.0591	0.1589	0.0283	0.1378	0.1085	0.0933	0.1347	0.1078	0.0596	0.0404	0.1034	0.1838	0.1458	0.1668	0.0118	0.1223	0.0895	0.098	0.0897	0.093	0.0458	0.0411	0.0091	0.1328	0.1317	0.0699	0.0713	0.0783	0.0863	0.2312	0.141	0.071	0.2291	0.14	0.1827	0.0071	0.1692	0.2833	Flesk Wood
		Fredville	0.1486	0.1853	0.0885	0.2319	0.1806	0.1498	0.1935	0.1927	0.1539	0.0919	0.116	0.2584	0.2171	0.215	0.0581	0.1744	0.1555	0.1305	0.1855	0.1124	0.1391	0.1427	0.0891	0.163	0.1899	0.1175	0.1651	0.1278	0.1631	0.2653	0.1409	0.1372	0.2824	0.1845	0.2101	0.1382	0.1264	0.3535	Fredville
		Gall Pond Knoll	0.1887	0.3188	0.1889	0.2253	0.1596	0.2051	0.2518	0.1915	0.1378	0.1491	0.2027	0.2451	0.1958	0.2265	0.1709	0.2779	0.1639	0.1347	0.1289	0.2114	0.1781	0.1096	0.1627	0.1335	0.2186	0.1898	0.2496	0.1471	0.1428	0.3173	0.2336	0.1858	0.3413	0.2335	0.2736	0.1094	0.3588	0.3573	Gall Pond Knoll
		Garratts Farm	0.1021	0.1838	0.0615	0.1644	0.124	0.1306	0.1431	0.1341	0.0781	0.0656	0.1118	0.1923	0.1523	0.0989	0.0438	0.1602	0.0601	0.0545	0.1345	0.0504	0.0992	0.054	0.0163	0.1139	0.1303	0.0595	0.1384	0.0863	0.12	0.2279	0.0888	0.0754	0.221	0.1314	0.1475	0.0645	0.0542	0.3083	Garratts Farm
		Glen	0.0936	0.1749	0.0687	0.1663	0.1262	0.0965	0.1571	0.1548	0.0764	0.0754	0.1225	0.2173	0.1669	0.1941	0.057	0.1276	0.1082	0.1116	0.1083	0.1335	0.0298	0.0702	0.0501	0.1628	0.1629	0.1084	0.0881	0.114	0.1261	0.2736	0.1718	0.0794	0.2875	0.1962	0.1919	0.0645	0.2034	0.2916	Glen
		Godinton	0.0767	0.2054	0.078	0.2019	0.1363	0.1447	0.1604	0.1663	0.1212	0.1012	0.1458	0.237	0.2018	0.2075	0.0754	0.1724	0.1126	0.1388	0.1112	0.1	0.0691	0.0209	0.0363	0.133	0.1109	0.0956	0.0789	0.0943	0.1121	0.2403	0.1598	0.0855	0.299	0.211	0.2324	0.0553	0.2311	0.2756	Godinton
		Hagley Hall	0.071	0.1739	0.0709	0.1474	0.1007	0.1064	0.1006	0.1258	0.1023	0.0856	0.0841	0.1716	0.1297	0.1418	0.0636	0.1123	0.0864	0.1159	0.1121	0.0558	0.0696	0.0422	0.0229	0.108	0.1009	0.0507	0.0841	0.0334	0.0797	0.1929	0.0705	0.0613	0.2453	0.1071	0.1321	0.0551	0.1234	0.2622	Hagley Hall
		Halswell Park	0.1148	0.2396	0.1258	0.2326	0.1651	0.2092	0.2193	0.216	0.1451	0.1359	0.2032	0.2582	0.2299	0.2737	0.0891	0.2432	0.1926	0.1616	0.1389	0.193	0.1053	0.1204	0.1131	0.1879	0.177	0.1699	0.061	0.1049	0.1374	0.3101	0.1819	0.143	0.4153	0.2538	0.2079	0.1206	0.3337	0.3132	Halswell Park
		Highnam Wood	0.0538	0.1483	-0.001	0.1749	0.1118	0.1203	0.1401	0.1261	0.0861	0.0632	0.0933	0.1986	0.1602	0.1563	0.0309	0.1426	0.0966	0.0829	0.1024	0.0229	0.0591	-0.0036	-0.0671	0.1191	0.073	0.067	0.0167	0.0511	0.0698	0.1714	0.0772	0.0573	0.2649	0.1227	0.1403	0.0471	0.1256	0.2755	Highnam Wood
		Hockley Wood	0.0698	0.1214	0.0551	0.1335	0.0722	0.1107	0.123	0.0998	0.0849	0.0698	0.0936	0.1517	0.1444	0.133	0.0526	0.1344	0.057	0.1123	0.0729	0.068	0.0972	0.0385	0.0105	0.0748	0.0867	0.0362	0.135	0.0819	0.0361	0.1814	0.0799	0.0572	0.194	0.1046	0.1375	0.014	0.1644	0.1928	Hockley Wood
		Holbrook Park	0.0628	0.18	0.0615	0.1445	0.0791	0.1184	0.1264	0.1332	0.0959	0.0608	0.0802	0.1456	0.1259	0.1497	0.0205	0.1463	0.0797	0.0633	0.0629	0.0596	0.0375	0.0485	0.0107	0.0456	0.1061	0.0605	0.1125	0.0154	0.0718	0.2004	0.0955	0.0777	0.2432	0.135	0.1619	0.0212	0.1198	0.2558	Holbrook Park
		Holnicote House	0.1303	0.1877	0.1488	0.2151	0.1681	0.1244	0.1559	0.2083	0.1891	0.1679	0.1157	0.2173	0.2124	0.2202	0.1775	0.1558	0.149	0.1927	0.1697	0.135	0.1914	0.1664	0.1381	0.1204	0.1204	0.1696	0.1932	0.1059	0.142	0.1467	0.0944	0.1731	0.3441	0.183	0.2041	0.1288	0.2654	0.2495	Holnicote House
		Holt Hall	0.0443	0.1634	0.0481	0.2053	0.1173	0.1076	0.1219	0.1846	0.1328	0.066	0.0768	0.2182	0.1605	0.2054	0.0652	0.1189	0.1375	0.1398	0.1025	0.0565	0.0905	0.0546	0.0552	0.0959	0.0965	0.1	0.0781	0.0343	0.1068	0.1547	0.0972	0.1194	0.3143	0.1595	0.2029	0.0645	0.2004	0.2911	Holt Hall
		Hope Mansell	0.038	0.1534	0.0636	0.137	0.1009	0.0311	0.0534	0.1303	0.0379	0.0562	0.0571	0.1565	0.1486	0.1335	0.0452	0.0553	0.0539	0.0569	0.0883	0.038	0.0827	0.0063	0.0064	0.0689	0.084	0.0778	0.1067	0.0157	0.0522	0.1771	0.0694	0.0856	0.2056	0.0697	0.1571	0.015	0.138	0.2443	Hope Mansell
		Johnson Wood	0.0407	0.1783	0.0782	0.1521	0.0691	0.0907	0.1306	0.124	0.0558	0.073	0.096	0.1914	0.1284	0.1422	0.0609	0.1171	0.0954	0.0752	0.0859	0.074	0.0686	0.0051	0.0516	0.0826	0.1018	0.1071	0.1158	0.0356	0.0927	0.2146	0.1104	0.0991	0.2978	0.1401	0.1628	0.0482	0.2038	0.2755	Johnson Wood
		Kilshane	0.1663	0.2722	0.1488	0.2028	0.1537	0.2127	0.158	0.1787	0.1264	0.1396	0.1823	0.235	0.1618	0.1592	0.1575	0.2132	0.133	0.1167	0.1871	0.1367	0.176	0.1013	0.1052	0.1769	0.1269	0.1024	0.192	0.1345	0.1462	0.2654	0.1434	0.0864	0.3416	0.176	0.1603	0.1578	0.2179	0.334	Kilshane
		Larkey Valley L35 (GB Clone 62)	0.1493	0.1968	0.0876	0.1463	0.1454	0.1101	0.1339	0.1244	0.1054	0.0527	0.1015	0.1893	0.1274	0.1314	0.0806	0.1297	0.0825	0.1168	0.1548	0.0841	0.1153	0.1296	0.0471	0.1514	0.185	0.0501	0.1569	0.1073	0.105	0.2373	0.0939	0.0511	0.2307	0.0907	0.1357	0.0873	0.0758	0.3434	Larkey Valley L35 (GB Clone 62)
		Lesnes Abbey	0.0662	0.1792	0.0845	0.1779	0.0866	0.0982	0.1452	0.1747	0.0518	0.0688	0.1033	0.2248	0.1157	0.1715	0.0883	0.11	0.0894	0.1	0.1069	0.133	0.0676	0.0998	0.0684	0.1377	0.1636	0.0861	0.1274	0.0887	0.1296	0.2324	0.1465	0.1065	0.2047	0.1515	0.1719	0.0356	0.1586	0.2849	Lesnes Abbey
		Littledean Camp Mill Grove	0.104	0.1638	0.1012	0.1758	0.1042	0.1417	0.1483	0.1616	0.0935	0.1141	0.1241	0.1889	0.1526	0.1525	0.1162	0.1539	0.069	0.1288	0.1415	0.0779	0.1577	0.0743	0.0505	0.1138	0.0796	0.0735	0.1502	0.1094	0.0919	0.1455	0.0623	0.0868	0.1677	0.1169	0.145	0.0783	0.1727	0.218	Littledean Camp Mill Grove
		Lizard Wood 1 (GB Clone 67)	0.0442	0.139	0.0381	0.0672	0.0976	0.0867	0.0768	0.0881	0.0778	0.0265	0.0531	0.0945	0.1304	0.0992	0.0293	0.1188	0.058	0.1002	0.0962	0.0447	0.0878	0.0004	-0.0226	0.0994	0.1031	0.0434	0.093	0.044	0.0267	0.1542	0.0266	0.036	0.2448	0.0624	0.0744	0.0205	0.1146	0.2423	Lizard Wood 1 (GB Clone 67)
		Llanfihangel Crucorney	0.0539	0.1739	0.063	0.1421	0.1116	0.1107	0.1457	0.1254	0.0802	0.0771	0.1024	0.1586	0.1459	0.1594	0.0604	0.1424	0.0915	0.0769	0.0873	0.0657	0.0848	0.0129	0.0326	0.0706	0.0819	0.0945	0.0905	0.0423	0.0714	0.157	0.1053	0.0958	0.2519	0.1469	0.1914	0.0142	0.1905	0.2475	Llanfihangel Crucorney
		Long Plantation A (GB Clone 71)	-0.0056	0.1147	0.0018	0.1451	0.0623	0.071	0.0935	0.1061	0.0737	0.059	0.1028	0.1711	0.1142	0.1423	0.0435	0.1092	0.0722	0.0818	0.0339	0.0432	0.0413	0.0111	0.0096	0.0642	0.02	0.0538	-0.0005	0.0138	0.0441	0.1305	0.0634	0.0348	0.2651	0.1361	0.1476	-0.0018	0.1846	0.1789	Long Plantation A (GB Clone 71)
		Lydney Park	0.1066	0.1764	0.06	0.2039	0.1403	0.15	0.1675	0.1802	0.1059	0.0855	0.1331	0.2277	0.1815	0.1868	0.0554	0.1634	0.1243	0.102	0.1339	0.0902	0.0627	0.089	0.0435	0.1433	0.1347	0.1001	0.0789	0.0979	0.1355	0.2397	0.1309	0.1019	0.2594	0.1847	0.1792	0.0925	0.1674	0.2845	Lydney Park
		Nailbridge	0.1404	0.245	0.1316	0.1847	0.0706	0.1886	0.1447	0.1653	0.0973	0.1252	0.1066	0.1669	0.1067	0.1805	0.1071	0.1887	0.0927	0.0825	0.0884	0.1053	0.1399	0.0771	0.0604	0.057	0.0539	0.0655	0.2142	0.0826	0.0639	0.1936	0.1175	0.0841	0.2675	0.1482	0.153	0.0646	0.206	0.2433	Nailbridge
		Nettlecombe Park	0.0923	0.2063	0.0826	0.1645	0.1018	0.116	0.1398	0.1383	0.0541	0.0756	0.0992	0.1925	0.1517	0.1935	0.064	0.1654	0.1162	0.0699	0.083	0.0921	0.0904	0.0084	0.0347	0.1092	0.0877	0.1184	0.1133	0.0878	0.057	0.2039	0.1286	0.0821	0.3163	0.1787	0.1708	0.0635	0.2621	0.2583	Nettlecombe Park
		Norsey Wood	0.0619	0.1755	0.0782	0.154	0.0745	0.136	0.1331	0.1438	0.0851	0.0722	0.097	0.1577	0.1284	0.1471	0.0496	0.1572	0.0568	0.0725	0.0676	0.0877	0.0759	0.0208	0.0251	0.0309	0.0875	0.0638	0.1249	0.0295	0.0506	0.2011	0.0847	0.1049	0.2301	0.1251	0.1804	0.0104	0.1737	0.234	Norsey Wood
		Penshurst Collinses Toll	0.0785	0.2298	0.125	0.175	0.1042	0.142	0.1833	0.1656	0.0964	0.11	0.1498	0.1955	0.1501	0.1868	0.1226	0.2005	0.1096	0.1094	0.0755	0.1531	0.1215	0.0527	0.0966	0.0717	0.1291	0.13	0.1681	0.0659	0.094	0.2206	0.1558	0.1371	0.2904	0.1939	0.2244	0.0407	0.2808	0.2593	Penshurst Collinses Toll
		Philip's Wood	0.0774	0.2008	0.0906	0.1472	0.1268	0.0897	0.157	0.1556	0.0967	0.0785	0.1172	0.1911	0.1635	0.2094	0.04	0.1469	0.143	0.1168	0.1075	0.116	0.0274	0.0562	0.0531	0.1385	0.1853	0.1217	0.1294	0.051	0.0997	0.2941	0.1543	0.1097	0.342	0.1809	0.1956	0.0616	0.2146	0.3324	Philip's Wood
		Popes Hill	0.0518	0.1461	0.0586	0.139	0.109	0.1138	0.1148	0.1207	0.1104	0.0773	0.1213	0.1442	0.1617	0.1242	0.0809	0.1145	0.0657	0.1218	0.1163	0.0835	0.1164	0.0632	0.0446	0.1022	0.0802	0.063	0.0795	0.0542	0.0751	0.1443	0.0676	0.073	0.2017	0.0962	0.1602	0.0463	0.1869	0.2275	Popes Hill
		Powderham A (GB Clone 94)	0.0652	0.1674	0.0567	0.1558	0.1036	0.1169	0.1463	0.1358	0.0677	0.0555	0.1075	0.1939	0.1441	0.1587	0.0535	0.1413	0.0866	0.0911	0.1072	0.0794	0.0576	0.0397	0.0348	0.1187	0.1114	0.0765	0.0805	0.085	0.103	0.1937	0.1189	0.0718	0.2273	0.1594	0.1788	0.045	0.1832	0.2597	Powderham A (GB Clone 94)
		Priest Wood	0.0907	0.2267	0.1251	0.1192	0.1195	0.1069	0.1716	0.1167	0.0766	0.0795	0.1236	0.1349	0.1813	0.1689	0.0632	0.185	0.1034	0.1079	0.1016	0.1655	0.081	0.052	0.0878	0.0971	0.177	0.1425	0.2029	0.0862	0.0847	0.2887	0.1761	0.1312	0.3125	0.1829	0.209	0.0297	0.2905	0.3011	Priest Wood
		Puttenage	0.1107	0.1847	0.0779	0.1582	0.0842	0.142	0.1313	0.1389	0.1029	0.078	0.0848	0.1611	0.1376	0.1502	0.0495	0.1843	0.0708	0.0844	0.0728	0.07	0.0787	0.0329	0.0247	0.0464	0.0963	0.0672	0.1608	0.0701	0.0402	0.1934	0.0807	0.0773	0.2406	0.1383	0.1494	0.042	0.1504	0.2261	Puttenage
		Ruperra	0.0865	0.1656	0.0577	0.1506	0.1026	0.0902	0.116	0.1402	0.0498	0.0487	0.0762	0.1852	0.1319	0.1043	0.0573	0.1274	0.0308	0.0401	0.1094	0.0692	0.0492	0.0613	0.0096	0.0973	0.13	0.0569	0.143	0.0893	0.1144	0.216	0.095	0.0612	0.2097	0.135	0.1356	0.0473	0.0587	0.2725	Ruperra
		Sculpture trail	0.1372	0.2062	0.1033	0.1831	0.1008	0.1338	0.1397	0.1502	0.1032	0.0965	0.091	0.2053	0.1626	0.176	0.0368	0.1822	0.0851	0.074	0.0881	0.0848	0.0996	0.0852	0.0497	0.0637	0.1141	0.0811	0.1752	0.0878	0.1123	0.248	0.1177	0.0988	0.2537	0.1701	0.18	0.0878	0.1132	0.2866	Sculpture trail
		Serridge	0.0452	0.1796	0.0695	0.1242	0.0627	0.1115	0.1245	0.0992	0.0685	0.0558	0.0742	0.1304	0.145	0.1492	0.0065	0.1577	0.0719	0.0719	0.0367	0.0395	0.0348	-0.0312	0.0037	0.0167	0.0848	0.0641	0.1312	0.0115	0.0297	0.2162	0.0984	0.0686	0.2727	0.1332	0.1658	-0.0199	0.1827	0.2505	Serridge
		Seven Sisters, Penshurst	0.2351	0.3185	0.2526	0.3147	0.2567	0.2379	0.2911	0.3077	0.2566	0.2703	0.2846	0.3278	0.3447	0.3341	0.248	0.2513	0.2647	0.282	0.2348	0.2946	0.2944	0.2375	0.2193	0.2423	0.281	0.2659	0.2886	0.1932	0.1813	0.3872	0.2459	0.2485	0.4014	0.2521	0.2902	0.2122	0.3852	0.4045	Seven Sisters, Penshurst
		Speech House	0.1139	0.2332	0.1249	0.1974	0.1014	0.1502	0.1179	0.1635	0.1506	0.1479	0.1403	0.1954	0.131	0.1859	0.1269	0.163	0.1418	0.1289	0.0921	0.0283	0.145	0.0372	0.0659	0.0652	0.0891	0.121	0.1696	0.0348	0.067	0.2051	0.1022	0.1355	0.3177	0.1343	0.1943	0.0769	0.2343	0.2921	Speech House
		St Pierre	0.0448	0.1382	0.0264	0.113	0.0783	0.0873	0.1318	0.109	0.0455	0.034	0.0744	0.1423	0.1105	0.133	-0.0069	0.1304	0.0654	0.0609	0.0734	0.0324	0.0382	-0.004	-0.0014	0.0905	0.0958	0.0646	0.0686	0.0542	0.0705	0.197	0.0909	0.0572	0.2363	0.1402	0.1416	0.019	0.1327	0.2565	St Pierre
		Staple Edge	0.1135	0.2278	0.0828	0.1451	0.0748	0.1499	0.1164	0.1203	0.1038	0.0984	0.1296	0.1627	0.1183	0.1896	0.0502	0.1851	0.1149	0.0867	0.0352	0.0596	0.063	-0.029	0.0158	0.0729	0.1045	0.1007	0.1206	0.0532	0.0371	0.2424	0.1283	0.0969	0.3073	0.1494	0.1793	0.0621	0.2309	0.2915	Staple Edge
		Stour Wood	0.0695	0.1853	0.0737	0.1596	0.1069	0.0471	0.0933	0.1333	0.0504	0.0693	0.0814	0.1884	0.1614	0.1368	0.0492	0.0649	0.0521	0.0559	0.0959	0.0919	0.0337	0.0448	0.0293	0.0905	0.1316	0.0838	0.1125	0.0528	0.094	0.2395	0.1246	0.0736	0.2557	0.1339	0.1698	0.0062	0.1522	0.2817	Stour Wood
		Sunninghill	0.1094	0.1512	0.0501	0.1646	0.1152	0.1085	0.126	0.1302	0.0747	0.0277	0.0589	0.1906	0.1281	0.1087	0.0651	0.1446	0.0506	0.078	0.1406	0.076	0.1247	0.0915	0.0346	0.1189	0.1126	0.0386	0.1481	0.1156	0.101	0.1451	0.0593	0.0577	0.1933	0.1125	0.1252	0.0798	0.1014	0.2627	Sunninghill
		The Hangings	0.0696	0.1412	0.0397	0.1546	0.1069	0.0936	0.1251	0.1228	0.0973	0.0439	0.1071	0.1815	0.15	0.1458	0.0413	0.1355	0.064	0.1224	0.0825	0.0717	0.0126	0.0507	0.0101	0.1138	0.1417	0.0543	0.0795	0.0755	0.0825	0.2224	0.1045	0.0478	0.2764	0.1543	0.1676	0.0284	0.1685	0.271	The Hangings
		The Weir	0.168	0.2074	0.127	0.2394	0.1456	0.1464	0.1626	0.2118	0.1196	0.1448	0.1178	0.2769	0.1713	0.1671	0.1365	0.1543	0.0725	0.1136	0.1932	0.1336	0.1382	0.1731	0.0781	0.1796	0.178	0.0823	0.2203	0.1719	0.1966	0.2696	0.1527	0.1067	0.2034	0.1709	0.1748	0.121	0.0017	0.3127	The Weir
		Tortworth Chestnut	0.1791	0.2436	0.1582	0.234	0.2013	0.167	0.2116	0.2034	0.1783	0.148	0.1929	0.2624	0.2625	0.225	0.1867	0.2267	0.1559	0.2148	0.1855	0.225	0.1934	0.1776	0.1479	0.1981	0.2262	0.1834	0.2723	0.2174	0.1551	0.2646	0.2092	0.1796	0.3157	0.2392	0.2611	0.1026	0.3423	0.2896	Tortworth Chestnut
		Turnips Grove	0.0631	0.1612	0.0582	0.146	0.075	0.0956	0.1295	0.129	0.0478	0.0648	0.0954	0.1919	0.0955	0.1341	0.0512	0.1058	0.0673	0.0681	0.1056	0.0546	0.0342	0.0346	0.0104	0.1255	0.1108	0.0623	0.0603	0.0498	0.0933	0.2228	0.0934	0.0559	0.2298	0.1225	0.1313	0.0489	0.1164	0.2717	Turnips Grove
		Upper Glen	0.0456	0.136	0.0549	0.0781	0.0713	0.0934	0.0969	0.0791	0.0551	0.0458	0.0962	0.1059	0.1219	0.1148	0.0216	0.1343	0.0667	0.0697	0.0789	0.0836	0.09	0.0097	0.0535	0.0812	0.0674	0.0857	0.104	0.0581	0.0364	0.1793	0.0745	0.0574	0.2804	0.1366	0.1272	0.04	0.2195	0.2005	Upper Glen
		Wardwell Wood, Newington	0.1144	0.1836	0.1059	0.2041	0.1149	0.1401	0.1463	0.1905	0.0192	0.0827	0.1092	0.2391	0.1554	0.1414	0.1045	0.1513	0.0591	0.115	0.1798	0.1485	0.1619	0.1218	0.0759	0.1776	0.1428	0.0618	0.173	0.1388	0.1452	0.2375	0.1031	0.0911	0.1688	0.1078	0.1174	0.1117	0.157	0.2994	Wardwell Wood, Newington
		Warley Place	0.054	0.1678	0.0475	0.1445	0.0707	0.0677	0.0878	0.1109	0.0489	0.0653	0.0463	0.1637	0.1084	0.1302	0.0302	0.0775	0.0436	0.0484	0.0687	0.0302	0.0459	-0.0136	-0.0379	0.0564	0.0867	0.0356	0.0845	0.0055	0.0315	0.203	0.0765	0.0645	0.193	0.0731	0.1386	-0.0101	0.0793	0.2663	Warley Place
		Welshbury	0.1069	0.1748	0.0855	0.21	0.1359	0.1289	0.1646	0.1788	0.1035	0.1172	0.139	0.2457	0.174	0.1715	0.1234	0.113	0.1095	0.1423	0.1656	0.0944	0.1226	0.1085	0.073	0.1717	0.1299	0.091	0.0971	0.119	0.1538	0.1956	0.1243	0.0946	0.1406	0.1267	0.1761	0.0849	0.1382	0.2738	Welshbury
		West Prawle Wood A (GB Clone 138)	0.0406	0.1473	0.0606	0.109	0.0898	0.0615	0.0993	0.1153	0.0129	0.045	0.0781	0.1394	0.1493	0.1114	0.0059	0.086	0.0365	0.0588	0.1109	0.0538	0.0361	0.0428	-0.0027	0.1087	0.1303	0.0472	0.1161	0.0626	0.0975	0.2436	0.1042	0.0574	0.187	0.1101	0.1259	-0.0032	0.0982	0.2742	West Prawle Wood A (GB Clone 138)
			PT01	PT02	PT03	SP01	SP02	SP03	SP04	SP05	SP06	SP07	SP08	SP09	SP10	SP11	SP12	SP13	SP14	SP15	SP16	SP17	FR01	FR02	FR03	IT01	IT02	IT03	IT04	IT05	IT06	IT07	IT08	IT09	SK02	SK03	HU01	RO01	RO02	RO03
sites 6 SSR 283 1332		all sites 245 EngIreWal
			PT01	PT02	PT03	SP01	SP02	SP03	SP04	SP05	SP06	SP07	SP08	SP09	SP10	SP11	SP12	SP13	SP14	SP15	SP16	SP17	FR01	FR02	FR03	IT01	IT02	IT03	IT04	IT05	IT06	IT07	IT08	IT09	SK02	SK03	HU01	RO01	RO02	RO03
1		Abbot's Wood Soudley	0.0859	0.1052	0.056	0.1361	0.1402	0.0767	0.0918	0.1045	0.1082	0.0546	0.1074	0.1665	0.1466	0.0614	0.112	0.0931	0.0304	0.1142	0.1538	0.0957	0.1291	0.127	0.0583	0.1152	0.113	0.0097	0.157	0.1069	0.0754	0.1411	0.0299	0.0245	0.2103	0.0834	0.127	0.0461	0.1121	0.227	Abbot's Wood Soudley
2		Abenhall hedge	0.1462	0.2295	0.1246	0.2122	0.0992	0.1552	0.1562	0.1844	0.0952	0.1079	0.1165	0.2261	0.116	0.1928	0.097	0.1595	0.0929	0.1331	0.1369	0.0894	0.1146	0.1064	0.0621	0.1383	0.1694	0.0827	0.1777	0.0992	0.113	0.266	0.1311	0.1223	0.2013	0.1197	0.1806	0.088	0.1516	0.3435	Abenhall hedge
3		Aconbury Hill (GB Clone 01)	0.0858	0.2145	0.0758	0.1175	0.1446	0.1523	0.1527	0.1126	0.0724	0.1123	0.1224	0.1092	0.1777	0.1004	0.0363	0.2177	0.0625	0.0685	0.1461	0.0195	0.1467	-0.0037	-0.0789	0.105	0.053	0.0795	0.1866	0.0764	0.0543	0.1984	0.0544	0.0801	0.2893	0.1276	0.1273	-0.0194	0.0902	0.2739	Aconbury Hill (GB Clone 01)
4		America Wood	0.0214	0.0778	0.0368	0.0929	0.1048	0.0253	0.0742	0.0842	0.077	0.0389	0.0228	0.1015	0.1617	0.1294	0.0066	0.0652	0.0771	0.111	0.1031	0.0916	0.094	0.0378	0.0193	0.0515	0.0606	0.0584	0.1531	0.0589	0.0478	0.1019	0.0368	0.0691	0.2915	0.1303	0.1326	-0.0163	0.1768	0.1881	America Wood
5		Arrallas Drive (GB Clone 02)	0.225	0.298	0.2538	0.1989	0.2269	0.2428	0.1805	0.212	0.2059	0.2127	0.2669	0.2236	0.2502	0.1607	0.2161	0.2757	0.1396	0.2468	0.266	0.2823	0.2428	0.2451	0.2255	0.2619	0.2357	0.1479	0.2656	0.1998	0.1877	0.3527	0.1326	0.108	0.4448	0.2197	0.1563	0.2073	0.3035	0.3268	Arrallas Drive (GB Clone 02)
6		Baldwyns	0.0706	0.1589	0.0871	0.223	0.147	0.0908	0.1402	0.2164	0.1256	0.1046	0.0793	0.257	0.182	0.2103	0.1255	0.1262	0.1423	0.1678	0.1508	0.1339	0.0661	0.1266	0.1044	0.1405	0.1632	0.1374	0.1514	0.1004	0.1605	0.2123	0.1356	0.1419	0.3347	0.1968	0.1953	0.0816	0.2114	0.29	Baldwyns
7		Ballymanus	0.1631	0.2558	0.1551	0.1443	0.1595	0.1553	0.1046	0.1168	0.0767	0.1035	0.1716	0.1633	0.176	0.0206	0.1509	0.19	0.0122	0.1196	0.2062	0.1133	0.1824	0.1025	0.066	0.187	0.1306	0.0723	0.1911	0.1345	0.1279	0.2663	0.0473	0.0395	0.3301	0.087	0.0743	0.1438	0.2179	0.327	Ballymanus
8		Barham Court, Teston	0.0245	0.1749	0.0554	0.1315	0.131	0.0466	0.1026	0.1202	0.034	0.063	0.07	0.1565	0.214	0.1491	-0.0125	0.145	0.0525	0.1321	0.0854	0.1015	-0.0071	0.0119	-0.0358	0.1383	0.1414	0.0835	0.066	0.0401	0.0697	0.2746	0.1228	0.0748	0.3365	0.1568	0.1544	-0.0249	0.1842	0.273	Barham Court, Teston
9		Bedford Purlieus	-0.0316	0.0811	-0.0005	0.094	0.0781	0.0403	0.0876	0.0598	0.069	0.0499	0.0666	0.1055	0.0982	0.1233	0.0555	0.0878	0.0781	0.0867	0.0604	0.0052	0.0832	-0.0017	-0.0312	0.0379	-0.0142	0.0416	0.0321	-0.0232	0.0063	0.0156	-0.004	0.0102	0.2773	0.0766	0.1153	-0.0364	0.1461	0.1638	Bedford Purlieus
10		Benenden	0.1516	0.2481	0.1746	0.1989	0.2497	0.2037	0.1658	0.1896	0.1947	0.1814	0.2453	0.2236	0.2688	0.1212	0.2195	0.216	0.0967	0.2372	0.2705	0.1986	0.2322	0.1869	0.1162	0.2595	0.1679	0.0985	0.1262	0.1687	0.1722	0.2559	0.0747	0.0557	0.3655	0.1506	0.152	0.1412	0.224	0.3191	Benenden
11		Bergholt A (GB Clone 03)	0.1004	0.1922	0.0495	0.222	0.1667	0.1386	0.1616	0.1779	0.134	0.0914	0.134	0.2414	0.2043	0.2129	0.0527	0.1756	0.1423	0.1442	0.1432	0.0192	0.05	0.0458	0.0017	0.1487	0.1167	0.1005	0.0167	0.0832	0.1249	0.2302	0.1132	0.084	0.3279	0.1872	0.2138	0.0846	0.1961	0.3296	Bergholt A (GB Clone 03)
12		Bertholey Park	0.1021	0.1718	0.0823	0.1855	0.1522	0.0938	0.1408	0.1683	0.0663	0.0841	0.1024	0.2268	0.1914	0.1402	0.0707	0.1299	0.0834	0.0564	0.1734	0.0919	0.1129	0.094	0.0684	0.1503	0.1494	0.1092	0.1602	0.1253	0.1589	0.2514	0.1318	0.1031	0.2437	0.1691	0.1698	0.0939	0.0986	0.3049	Bertholey Park
13		Big Wood A (GB Clone 05)	0.0768	0.2001	0.0846	0.1679	0.1552	0.1184	0.1885	0.1401	0.0734	0.0843	0.1592	0.2165	0.2093	0.1921	0.0818	0.1934	0.0972	0.1299	0.1108	0.1646	0.0598	0.0616	0.0397	0.1631	0.1864	0.1259	0.1254	0.1367	0.103	0.2786	0.1872	0.0894	0.3317	0.2151	0.2212	-0.004	0.266	0.3016	Big Wood A (GB Clone 05)
14		Bigsweir	0.0957	0.122	0.0382	0.1972	0.1703	0.0892	0.1489	0.1549	0.0903	0.0343	0.1024	0.2417	0.1853	0.1474	0.0632	0.1183	0.0908	0.1032	0.1781	0.1045	0.1116	0.1286	0.0876	0.1633	0.169	0.0823	0.1321	0.1404	0.1597	0.211	0.1177	0.0866	0.253	0.1716	0.187	0.0877	0.1146	0.3224	Bigsweir
15		Black Forest	0.2115	0.3091	0.2147	0.1945	0.1959	0.2529	0.1909	0.1865	0.2154	0.1916	0.2427	0.2263	0.1933	0.1328	0.2284	0.2604	0.1488	0.221	0.2509	0.1911	0.2516	0.1888	0.1831	0.2346	0.2184	0.1218	0.2638	0.1792	0.1917	0.3084	0.1396	0.1252	0.3652	0.1668	0.1485	0.2089	0.2553	0.3815	Black Forest
16		Blakeney Walk	0.076	0.1664	0.0591	0.1453	0.0867	0.0944	0.0927	0.1152	0.0752	0.0505	0.0823	0.1385	0.12	0.1169	0.0542	0.1423	0.0304	0.1086	0.0592	0.0848	0.0966	0.0269	0.0124	0.0308	0.0723	0.0398	0.1397	0.0432	-0.0119	0.1761	0.0478	0.0543	0.2454	0.093	0.1477	-0.0096	0.211	0.2364	Blakeney Walk
17		Boconnoc A (GB Clone 09)	0.0883	0.2245	0.0812	0.1478	0.1147	0.142	0.1565	0.1254	0.0887	0.1183	0.1153	0.1619	0.1754	0.1707	0.0091	0.144	0.1227	0.0882	0.1135	0.0155	0.0452	-0.0151	-0.056	0.1039	0.0869	0.0751	0.0817	0.0159	0.0944	0.251	0.1092	0.069	0.3064	0.1311	0.1475	0.0522	0.1115	0.3321	Boconnoc A (GB Clone 09)
18		Borthwood Copse	0.0297	0.1131	0.0374	0.1711	0.0848	0.0787	0.0864	0.1583	0.0891	0.0733	0.0829	0.1861	0.1615	0.1623	0.0479	0.1173	0.0797	0.1265	0.0507	0.1139	0.0365	0.0657	0.0444	0.0674	0.0498	0.0695	0.0641	0.0411	0.0713	0.1722	0.0828	0.0664	0.2839	0.1633	0.1412	0.0237	0.19	0.1713	Borthwood Copse
19		Boxted Hall (GB Clone 11)	0.0177	0.1269	-0.0282	0.09	0.0934	0.0119	0.0664	0.0189	-0.004	0.0107	0.0228	0.1167	0.1172	0.0725	-0.0536	0.1123	-0.0273	-0.0082	0.0562	-0.0807	-0.0071	-0.0575	-0.1871	0.058	0.0355	-0.0219	0.0061	0.0106	0.0387	0.1745	0.0434	-0.0397	0.2242	0.0757	0.1039	-0.0686	-0.0683	0.271	Boxted Hall (GB Clone 11)
20		Bradley Hill	0.096	0.2768	0.1068	0.1334	0.1386	0.1103	0.0756	0.1116	0.0091	0.0848	0.1154	0.1485	0.1868	0.1549	0.0157	0.186	0.0908	0.0401	0.0831	0.051	0.119	-0.0817	-0.0085	0.117	0.1583	0.142	0.1815	0.073	0.0679	0.3193	0.1631	0.1223	0.3567	0.1171	0.1765	-0.02	0.1967	0.387	Bradley Hill
21		Brampton Bryan Park	0.0376	0.1093	0.0368	0.1126	0.1148	0.0966	0.0865	0.1032	0.0802	0.0156	0.0977	0.1409	0.1168	0.0532	0.0792	0.1274	0.0195	0.0867	0.1279	0.0679	0.1005	0.0951	0.0429	0.11	0.1013	0.0164	0.1232	0.086	0.0867	0.1326	0.0427	0.0288	0.249	0.1119	0.1224	0.0374	0.1217	0.2384	Brampton Bryan Park
22		Brampton Hill A (GB Clone 12)	0.1066	0.2417	0.1087	0.218	0.2009	0.1799	0.2242	0.2065	0.1624	0.1708	0.196	0.2485	0.2465	0.2309	0.118	0.2134	0.1799	0.1776	0.1898	0.0958	0.0919	0.0587	0.025	0.1952	0.1302	0.1506	0.0368	0.0869	0.165	0.2797	0.1513	0.1177	0.3545	0.2143	0.2219	0.1004	0.2149	0.3367	Brampton Hill A (GB Clone 12)
23		Brierley Hill	0.1012	0.2667	0.116	0.1772	0.1022	0.1791	0.1902	0.1483	0.0897	0.1233	0.1296	0.1814	0.1601	0.2164	0.0813	0.2466	0.1361	0.1086	0.0277	0.1175	0.1457	-0.024	0.0541	0.0643	0.122	0.1299	0.1644	0.0338	0.0606	0.2617	0.1581	0.1529	0.3493	0.185	0.196	0.0541	0.2697	0.3259	Brierley Hill
24		Bryngwyn Wood A (GB Clone 17)	0.1665	0.2543	0.156	0.2049	0.159	0.1796	0.2108	0.1856	0.1644	0.1623	0.195	0.2188	0.1927	0.2334	0.1393	0.2371	0.152	0.162	0.1149	0.1818	0.1161	0.1315	0.1133	0.1314	0.1818	0.1475	0.1784	0.1075	0.1058	0.2818	0.1602	0.1471	0.3448	0.229	0.2285	0.0983	0.2891	0.2886	Bryngwyn Wood A (GB Clone 17)
25		Buckland Hill, Bwlch	0.0505	0.1424	0.0792	0.1904	0.1435	0.0715	0.0628	0.1629	0.1062	0.1445	0.0958	0.1967	0.1535	0.1538	0.1523	0.12	0.1156	0.1074	0.148	0.0069	0.2072	0.0633	0.0838	0.0856	-0.0581	0.1162	0.1574	0.0858	0.1307	0.0586	0.0512	0.0713	0.377	0.1553	0.1506	0.085	0.1633	0.2249	Buckland Hill, Bwlch
26		Burnt Stump Park (GB Clone 20)	0.0602	0.2384	0.1545	0.1558	0.2064	0.061	0.2211	0.1821	0.0262	0.095	0.1683	0.1981	0.2635	0.2044	0.0827	0.2027	0.1255	0.1276	0.1786	0.2168	0.1466	0.0706	0.1121	0.2171	0.2407	0.1972	0.2213	0.1415	0.1629	0.3657	0.2298	0.1632	0.4056	0.2532	0.2536	0.0682	0.3093	0.3674	Burnt Stump Park (GB Clone 20)
27		Bus Stop Coppice (GB Clone 21)	0.0863	0.1978	0.0337	0.1659	0.081	0.0867	0.083	0.1202	0.0729	0.045	0.0548	0.1599	0.1403	0.1277	0.0208	0.1491	0.0418	0.0471	0.03	0.0831	0.0196	0.0524	-0.0358	0.0719	0.1139	0.0779	0.1465	0.0633	0.0939	0.2297	0.1116	0.0841	0.3118	0.1258	0.1413	0.0304	0.1177	0.3091	Bus Stop Coppice (GB Clone 21)
28		Bushy House	0.3043	0.3241	0.2696	0.3332	0.3381	0.3131	0.3363	0.3275	0.2965	0.2952	0.3162	0.3574	0.3578	0.2706	0.3004	0.3503	0.2277	0.2799	0.3662	0.2957	0.3363	0.3509	0.2345	0.3191	0.3345	0.2333	0.4092	0.3327	0.2986	0.3683	0.2496	0.2483	0.3521	0.3194	0.284	0.2245	0.1874	0.4032	Bushy House
29		Camolin Park	0.0307	0.1493	0.0878	0.0859	0.0991	0.0118	0.0863	0.062	0.0254	0.069	0.0525	0.0855	0.168	0.0919	0.0359	0.0678	-0.0033	0.118	0.091	0.1408	0.0718	0.0516	-0.0213	0.0538	0.0996	0.0092	0.1572	0.0106	0.0306	0.2202	0.0704	0.031	0.1847	0.0383	0.1418	-0.0794	0.1492	0.2196	Camolin Park
30		Canford School	0.0226	0.0779	0.0069	0.1652	0.1087	0.0762	0.1048	0.1399	0.0739	0.0538	0.0934	0.1833	0.1723	0.1359	0.0489	0.1062	0.0542	0.119	0.1121	0.0698	0.0753	0.0377	0.0091	0.1097	0.0436	0.0646	0.0529	0.0801	0.0956	0.1582	0.0652	0.0587	0.2328	0.1294	0.149	0.0404	0.1578	0.208	Canford School
31		Cappoquin Ho	0.0932	0.1922	0.0515	0.2113	0.1741	0.1424	0.1701	0.1815	0.1506	0.1289	0.1558	0.2386	0.2224	0.1908	0.1001	0.1575	0.1304	0.1412	0.1603	0.0834	0.125	0.0683	0.0406	0.1553	0.1353	0.1102	0.1141	0.1228	0.1367	0.2373	0.1375	0.1026	0.2677	0.1864	0.2113	0.0636	0.149	0.3034	Cappoquin Ho
32		Carburton (GB Clone 22)	0.0775	0.2213	0.0528	0.1412	0.0908	0.0943	0.0709	0.0889	0.0539	0.087	0.0774	0.1322	0.1525	0.0689	-0.0011	0.1408	0.0346	0.0162	0.0854	-0.081	0.0882	-0.0713	-0.0799	0.0582	0.0575	0.0489	0.1125	0.0107	0.0746	0.2343	0.0619	0.0535	0.2402	0.0592	0.1026	0.006	-0.012	0.3245	Carburton (GB Clone 22)
33		Catsash, Wentwood	0.1384	0.2237	0.1042	0.2112	0.1667	0.1723	0.1795	0.1872	0.1383	0.1435	0.1538	0.2291	0.2069	0.1796	0.086	0.1955	0.1241	0.0943	0.1685	0.0691	0.142	0.0829	0.0444	0.1328	0.1338	0.1163	0.1611	0.1049	0.1508	0.2557	0.1224	0.1275	0.278	0.1805	0.1962	0.1011	0.1071	0.3252	Catsash, Wentwood
34		Cefn Mabli	0.0885	0.1559	0.1323	0.1743	0.1037	0.0563	0.1326	0.1734	0.0025	0.1227	0.0645	0.2168	0.148	0.1186	0.1547	0.0747	0.0308	0.1001	0.185	0.1289	0.192	0.1281	0.0754	0.1492	0.1254	0.1002	0.2258	0.1244	0.1424	0.1792	0.0709	0.1095	0.1754	0.0723	0.0897	0.0774	0.1163	0.2566	Cefn Mabli
35		Chalkney Wood	0.1131	0.1546	0.0658	0.1975	0.1378	0.0953	0.1422	0.1745	0.0895	0.0694	0.1068	0.2378	0.1683	0.1574	0.0647	0.1285	0.072	0.092	0.1514	0.1135	0.058	0.1296	0.0533	0.1515	0.1799	0.0791	0.159	0.1336	0.1454	0.2583	0.1352	0.0832	0.2139	0.1696	0.1848	0.0651	0.0745	0.2897	Chalkney Wood
36		Champions Wood	0.117	0.2174	0.1057	0.115	0.081	0.0968	0.0583	0.0314	0.0804	0.0734	0.0548	0.1101	0.1212	0.0562	0.0469	0.1128	0.0382	0.0795	0.0854	0.005	0.1412	-0.0406	-0.0016	0.0502	0.1063	0.0367	0.1526	0.003	-0.0142	0.2433	0.0224	0.0208	0.2943	-0.0217	0.0478	0.0536	0.1177	0.3417	Champions Wood
37		Chessgrove	0.0994	0.1987	0.0528	0.1541	0.0554	0.1036	0.1456	0.111	0.0291	0.0682	0.0961	0.1747	0.0806	0.1288	0.0638	0.1276	0.057	0.0792	0.0446	0.0311	0.1044	0.0174	-0.0285	0.0797	0.0798	0.0317	0.0711	0.0398	0.0663	0.1816	0.0786	0.0365	0.0842	0.0315	0.1114	0.012	0.0891	0.2872	Chessgrove
38		Chestnut Street, Borden	0.071	0.1743	0.0661	0.1685	0.0986	0.1241	0.1543	0.1532	0.0608	0.0623	0.1175	0.1966	0.1492	0.1787	0.0356	0.1309	0.0924	0.0981	0.1057	0.1162	0.0688	0.0727	0.0473	0.1334	0.1502	0.0863	0.0876	0.0679	0.0953	0.2349	0.1268	0.102	0.2154	0.1378	0.1807	0.0492	0.19	0.2886	Chestnut Street, Borden
39		Chestnuts Wood	0.0915	0.1333	0.0397	0.2047	0.1485	0.0943	0.1514	0.1762	0.092	0.0637	0.0997	0.2517	0.1792	0.1791	0.0701	0.1143	0.1117	0.1049	0.1593	0.1023	0.0918	0.1136	0.0646	0.1683	0.1452	0.0974	0.1094	0.1412	0.1638	0.2075	0.1393	0.0905	0.2231	0.1817	0.1874	0.0908	0.1183	0.2828	Chestnuts Wood
40		Chilham Castle	0.0505	0.1382	0.0312	0.1703	0.1129	0.1053	0.1248	0.1504	0.1094	0.0687	0.1135	0.1991	0.1481	0.1574	0.0731	0.1312	0.1019	0.1167	0.0994	0.0635	0.0569	0.0638	0.0377	0.1181	0.0769	0.0821	0.0101	0.0639	0.1096	0.155	0.0816	0.0546	0.2803	0.1575	0.1598	0.0551	0.1789	0.2371	Chilham Castle
41		Clanna A (GB Clone 23)	0.0714	0.1454	0.0399	0.1855	0.1391	0.1249	0.1092	0.1438	0.1227	0.0551	0.1411	0.2138	0.1668	0.1468	0.0985	0.1653	0.0852	0.167	0.1174	0.139	0.1269	0.0834	0.053	0.1489	0.0884	0.0278	0.0644	0.1088	0.0878	0.1694	0.0852	0.0212	0.3073	0.1621	0.1556	0.0737	0.2244	0.243	Clanna A (GB Clone 23)
42		Clements End A (GB Clone 25)	0.0969	0.2262	0.1225	0.1644	0.1066	0.143	0.1329	0.1604	0.064	0.1178	0.1316	0.1488	0.1893	0.1584	0.0452	0.1535	0.0704	0.0549	0.0796	0.0929	0.0381	0.0391	0.0255	0.0101	0.086	0.0609	0.1563	0.0194	0.0702	0.2849	0.1167	0.0581	0.2963	0.1644	0.1509	-0.0018	0.1746	0.2612	Clements End A (GB Clone 25)
43		Cluny Hill (GB Clone 28)	0.1449	0.2164	0.1565	0.1074	0.172	0.1567	0.1173	0.126	0.0573	0.041	0.1574	0.1203	0.1805	0.0017	0.1077	0.2177	-0.0273	0.1156	0.2152	0.1703	0.2238	0.1438	0.1288	0.1509	0.1749	0.0467	0.2527	0.1435	0.1027	0.2654	0.0104	0.0573	0.2947	0.0919	0.0925	0.092	0.1824	0.3173	Cluny Hill (GB Clone 28)
44		Clytha	0.0892	0.1637	0.0392	0.173	0.1284	0.0754	0.1256	0.1408	0.0488	0.0408	0.0755	0.2159	0.1819	0.1423	0.0166	0.1263	0.0584	0.0592	0.1225	0.0773	0.0478	0.0657	0.0112	0.139	0.1395	0.0767	0.113	0.1154	0.1324	0.2481	0.1447	0.067	0.23	0.1647	0.1711	0.0502	0.0957	0.2949	Clytha
45		Cockington A (GB Clone 29)	0.0468	0.1988	0.0758	0.0865	0.0739	0.1322	0.1136	0.0953	0.0687	0.093	0.0753	0.0578	0.1204	0.0926	-0.0067	0.1854	0.059	0.0278	0.0451	0.0318	0.1022	-0.0403	-0.0567	-0.01	0.0509	0.0467	0.2029	-0.0152	0.0226	0.2195	0.0741	0.1001	0.3334	0.1177	0.1349	-0.0194	0.0681	0.2768	Cockington A (GB Clone 29)
46		Cockney Hill Wood (GB Clone 30)	0.1005	0.225	0.1151	0.192	0.2064	0.1869	0.1567	0.1618	0.179	0.2039	0.1775	0.1666	0.2558	0.124	0.1629	0.2516	0.0896	0.1227	0.2088	0.1104	0.2253	0.115	-0.0016	0.161	0.0946	0.114	0.1911	0.1107	0.1429	0.2026	0.0848	0.1248	0.3269	0.1568	0.1486	0.0969	0.0912	0.2641	Cockney Hill Wood (GB Clone 30)
47		Cockshoot Lodge	-0.0316	0.111	0.0411	0.1123	0.0702	0.0467	0.0527	0.0989	0.0359	0.0573	0.0769	0.1207	0.1446	0.0751	0.0387	0.0822	0.0087	0.0449	0.0679	0.0636	0.08	0.0089	0.0359	0.0375	0.0051	0.0527	0.0943	0.0228	0.0584	0.1203	0.0646	0.0558	0.2472	0.1209	0.1539	-0.0472	0.1562	0.1347	Cockshoot Lodge
48		Coed Orllwyn (GB Clone 31)	0.198	0.1896	0.1615	0.2085	0.2394	0.2124	0.1846	0.1855	0.2018	0.1002	0.2178	0.2192	0.2268	0.1349	0.1706	0.2532	0.1087	0.2569	0.2712	0.2689	0.2783	0.2527	0.186	0.2499	0.219	0.1088	0.2765	0.2293	0.1322	0.2297	0.0473	0.1146	0.4036	0.1857	0.1629	0.1828	0.3136	0.3143	Coed Orllwyn (GB Clone 31)
49		Coolnamuck	0.0289	0.1923	0.0686	0.106	0.061	0.1239	0.126	0.0905	0.0815	0.0938	0.0818	0.0805	0.1429	0.0993	0.0601	0.1831	0.0678	0.0881	0.0396	0.0482	0.1355	-0.0351	0.0319	0.0129	0.0296	0.0973	0.1425	-0.0177	0.0054	0.1243	0.0434	0.1083	0.2783	0.0817	0.1097	-0.0092	0.2402	0.2042	Coolnamuck
50		Copperas Wood	0.0821	0.1974	0.0624	0.1583	0.123	0.1165	0.1004	0.132	0.1214	0.0928	0.1349	0.17	0.2038	0.153	0.0471	0.1495	0.1023	0.1224	0.1057	0.101	0.0955	0.0505	0.0391	0.1346	0.1142	0.1044	0.0754	0.0783	0.0818	0.2289	0.1176	0.0885	0.2626	0.137	0.173	0.0555	0.2233	0.2511	Copperas Wood
51		Corbet Wood, Grinshill	0.0715	0.2033	0.0475	0.133	0.0652	0.1208	0.1326	0.1031	-0.0157	0.0481	0.0931	0.1485	0.1043	0.1496	-0.0018	0.1573	0.0712	0.0034	0.057	0.0208	0.0707	-0.0492	-0.0331	0.0613	0.0377	0.0434	0.0613	0.0319	0.0426	0.2127	0.0924	0.0229	0.262	0.119	0.1285	0.0259	0.1768	0.2908	Corbet Wood, Grinshill
52		Cotehele A (GB Clone 32)	0.1503	0.2349	0.2022	0.1607	0.2216	0.1802	0.2025	0.1924	0.1393	0.1469	0.2224	0.2047	0.2505	0.1216	0.1901	0.2295	0.1046	0.193	0.2531	0.2473	0.2045	0.1863	0.192	0.2394	0.2588	0.1652	0.2703	0.2007	0.1754	0.3401	0.1502	0.1371	0.3779	0.2121	0.169	0.1344	0.2812	0.3404	Cotehele A (GB Clone 32)
53		Cowdray Avenue	0.0381	0.1484	0.0498	0.1081	0.1015	0.0964	0.1193	0.1123	0.0537	0.0495	0.0786	0.1223	0.1674	0.1105	0.0033	0.1302	0.0563	0.0692	0.1133	0.048	0.0736	-0.014	0.0302	0.0826	0.0894	0.0854	0.0843	0.0337	0.0776	0.2033	0.0681	0.0869	0.2626	0.1277	0.136	0.0491	0.1739	0.2608	Cowdray Avenue
54		Cowdray Park	0.1002	0.2002	0.0839	0.1673	0.0899	0.1397	0.1401	0.1451	0.0853	0.0646	0.0981	0.1762	0.1554	0.1692	0.0422	0.1644	0.0823	0.0892	0.073	0.0805	0.087	0.0188	0.0454	0.0654	0.1071	0.094	0.1312	0.0638	0.0643	0.2088	0.1121	0.1128	0.2454	0.1454	0.1893	0.0549	0.2198	0.2712	Cowdray Park
55		Coxheath Wood (GB Clone 34)	0.0587	0.2018	0.0927	0.0823	-0.0173	0.0755	0.0723	0.0269	-0.1142	0.0296	0.0695	0.0489	0.1033	0.0157	-0.0066	0.1457	-0.1107	-0.0292	-0.0234	0.0699	0.1085	-0.0276	-0.0016	-0.0332	0.057	0.022	0.1611	0.0055	0.006	0.2385	0.045	0.0432	0.0808	-0.0082	0.0474	-0.0403	0.1397	0.2451	Coxheath Wood (GB Clone 34)
56		Croft Park	0.0938	0.1762	0.0679	0.1854	0.1591	0.1078	0.1625	0.1656	0.0706	0.0671	0.119	0.2239	0.1964	0.1512	0.0703	0.1449	0.0688	0.0722	0.1514	0.1012	0.062	0.1007	0.0534	0.1386	0.1623	0.0942	0.1371	0.1251	0.1493	0.237	0.1528	0.0927	0.2117	0.1817	0.2113	0.04	0.1289	0.2935	Croft Park
57		Daniel's Wood (GB Clone 36)	0.0552	0.1951	0.0795	0.1334	0.0965	0.1255	0.1398	0.1136	0.1072	0.072	0.1287	0.1446	0.116	0.1514	0.0853	0.1596	0.0912	0.1224	0.0778	0.0706	0.0702	0.0175	0.0033	0.0741	0.0681	0.0372	0.0555	-0.0005	0.0381	0.1673	0.0672	0.0281	0.2822	0.1255	0.1547	0.0308	0.2103	0.2412	Daniel's Wood (GB Clone 36)
58		Denge Wood	0.0211	0.1741	0.0195	0.0793	0.0902	-0.0156	0.0581	0.0392	-0.0401	0.0068	0.033	0.0742	0.1424	0.1004	-0.0355	0.043	0.0006	0.0041	0.0099	0.037	0.0363	-0.0752	-0.1021	-0.0123	0.0487	0.0027	0.0917	-0.0286	-0.0382	0.2067	0.0741	-0.0164	0.2451	0.056	0.1273	-0.142	0.1314	0.2622	Denge Wood
59		Dinton Park	0.1282	0.1941	0.0818	0.2	0.1486	0.1047	0.1772	0.1951	0.097	0.0601	0.1132	0.2363	0.1621	0.2126	0.0944	0.1855	0.1418	0.1289	0.1261	0.1616	0.1379	0.1458	0.1045	0.1771	0.2065	0.1396	0.2028	0.1681	0.1706	0.2775	0.1879	0.129	0.3215	0.2158	0.1972	0.106	0.2009	0.3517	Dinton Park
60		Dock Copse, Botley	0.071	0.1351	0.07	0.1504	0.1019	0.1211	0.1074	0.1294	0.0953	0.101	0.1135	0.1431	0.1439	0.1021	0.091	0.0974	0.06	0.1089	0.1136	0.0121	0.1079	0.057	0.026	0.0278	0.0142	-0.0088	0.1467	0.0497	0.0755	0.1437	0.0556	0.0259	0.1998	0.095	0.1251	0.0119	0.1082	0.2163	Dock Copse, Botley
61		Dodnash (GB Clone 37)	0.0821	0.2225	0.0596	0.1588	0.0772	0.1152	0.0965	0.1138	0.0292	0.0696	0.0924	0.1744	0.1325	0.1691	0.0032	0.1528	0.0864	0.0233	0.042	0.0494	0.0428	-0.0766	-0.0032	0.0565	0.0411	0.0806	0.105	0.0486	0.0237	0.2523	0.131	0.0526	0.3211	0.1592	0.1772	0.0133	0.2218	0.2795	Dodnash (GB Clone 37)
62		Downes A (GB Clone 38)	0.0555	0.1552	0.0685	0.1674	0.0758	0.1214	0.1102	0.1372	0.0972	0.0803	0.0898	0.187	0.0859	0.1046	0.0855	0.1021	0.045	0.1011	0.1078	0.0268	0.0954	0.0234	-0.0002	0.0796	0.0726	-0.0069	0.0862	0.0181	0.0536	0.168	0.0281	0.0325	0.21	0.0692	0.1259	0.0413	0.0567	0.2593	Downes A (GB Clone 38)
63		Edgehills	0.068	0.1341	0.0682	0.143	0.0949	0.1247	0.0628	0.1151	0.1254	0.1127	0.121	0.1493	0.1479	0.1137	0.097	0.1339	0.0566	0.1134	0.0955	0.0656	0.1507	0.044	0.0545	0.0674	0.0733	0.0717	0.189	0.0914	0.0653	0.1616	0.0568	0.094	0.2149	0.0876	0.1434	0.0154	0.1367	0.2019	Edgehills
64		Edlington Wood	0.1137	0.2171	0.1268	0.1573	0.1138	0.1879	0.1369	0.1366	0.1413	0.1162	0.158	0.152	0.1497	0.1454	0.1138	0.2275	0.1114	0.1284	0.1079	0.1222	0.1568	0.0619	0.0785	0.069	0.0572	0.0678	0.1649	0.0732	0.0224	0.1952	0.0848	0.0621	0.3346	0.1632	0.1712	0.0763	0.2806	0.2188	Edlington Wood
65		Ellwood	0.0907	0.2129	0.0902	0.1633	0.1136	0.1546	0.1788	0.1495	0.1054	0.1053	0.152	0.1768	0.1684	0.2126	0.0757	0.1868	0.135	0.1157	0.0686	0.1179	0.0986	0.0168	0.0334	0.0802	0.1018	0.1133	0.0886	0.0434	0.0443	0.231	0.1267	0.0974	0.2983	0.1664	0.1939	0.0481	0.2652	0.2618	Ellwood
66		Endsleigh House A (GB Clone 40)	0.0245	0.0979	-0.0508	0.1748	0.1426	0.0209	0.0988	0.1202	-0.0174	-0.07	0.0331	0.1984	0.1673	0.1203	-0.0668	0.1128	0.0045	0.0122	0.1124	0.0195	0.0531	0.0081	-0.0648	0.1	0.0866	0.0115	0.0116	0.0611	0.0795	0.1717	0.0378	0.008	0.2381	0.1183	0.1726	0.011	0.0393	0.3011	Endsleigh House A (GB Clone 40)
67		Felbridge avenues	0.0774	0.1609	0.0341	0.1496	0.0905	0.0947	0.1288	0.1225	0.0364	0.0409	0.0721	0.1803	0.1263	0.1361	0.0179	0.1108	0.0585	0.0387	0.0984	0.0619	0.0554	0.028	-0.0063	0.1025	0.1112	0.0644	0.0962	0.0679	0.0897	0.2074	0.1044	0.0766	0.2062	0.1219	0.1538	0.0392	0.1174	0.275	Felbridge avenues
68		Firth Wood (GB Clone 42)	0.0741	0.1545	0.028	0.1765	0.1272	0.0811	0.1098	0.126	0.0456	0.0831	0.1191	0.203	0.2023	0.1339	0.0311	0.1402	0.0233	0.0824	0.1245	0.0086	0.0363	0.0449	-0.1603	0.1427	0.0761	0.0406	0.0824	0.0915	0.0934	0.2349	0.0689	0.0058	0.2764	0.1227	0.1243	0.0254	0.0624	0.2739	Firth Wood (GB Clone 42)
69		Flaxley park	0.0852	0.1985	0.0793	0.1607	0.0593	0.1312	0.105	0.1284	0.0428	0.0854	0.0853	0.143	0.1128	0.1171	0.0453	0.1489	0.0133	0.0383	0.0581	0.0189	0.0639	0.002	-0.029	-0.0065	0.0262	0.001	0.1397	0.0108	0.0221	0.189	0.054	0.0206	0.1737	0.0707	0.1223	-0.0271	0.0901	0.2403	Flaxley park
70		Flaxley Wood/Picks Copse	0.1034	0.2121	0.0927	0.1738	0.1082	0.1419	0.151	0.1602	0.1221	0.1085	0.1293	0.197	0.152	0.208	0.0764	0.1495	0.1313	0.1293	0.1011	0.1149	0.0771	0.0718	0.0443	0.133	0.1523	0.1167	0.1152	0.0774	0.0772	0.2415	0.1451	0.1118	0.2855	0.1602	0.1874	0.0523	0.2172	0.295	Flaxley Wood/Picks Copse
71		Flesk Wood	0.0591	0.1589	0.0283	0.1378	0.1085	0.0933	0.1347	0.1078	0.0596	0.0404	0.1034	0.1838	0.1458	0.1668	0.0118	0.1223	0.0895	0.098	0.0897	0.093	0.0458	0.0411	0.0091	0.1328	0.1317	0.0699	0.0713	0.0783	0.0863	0.2312	0.141	0.071	0.2291	0.14	0.1827	0.0071	0.1692	0.2833	Flesk Wood
72		Flimwell	0.1329	0.2232	0.1956	0.1835	0.1784	0.2105	0.2107	0.1884	0.226	0.1637	0.2269	0.1731	0.2268	0.1794	0.1967	0.2805	0.1024	0.2659	0.1253	0.2669	0.2386	0.1725	0.1772	0.1126	0.2025	0.0817	0.302	0.1553	0.0986	0.2607	0.1591	0.1511	0.374	0.2342	0.2499	0.0714	0.3318	0.2362	Flimwell
73		Fredville	0.1486	0.1853	0.0885	0.2319	0.1806	0.1498	0.1935	0.1927	0.1539	0.0919	0.116	0.2584	0.2171	0.215	0.0581	0.1744	0.1555	0.1305	0.1855	0.1124	0.1391	0.1427	0.0891	0.163	0.1899	0.1175	0.1651	0.1278	0.1631	0.2653	0.1409	0.1372	0.2824	0.1845	0.2101	0.1382	0.1264	0.3535	Fredville
74		Frith Wood A (GB Clone 43)	0.0332	0.149	0.0411	0.1069	0.0684	0.0934	0.1025	0.0882	0.0969	0.0466	0.0893	0.1039	0.1304	0.0985	0.0703	0.1695	0.0435	0.1329	0.0216	0.0938	0.0925	0.0128	0.0058	0.0415	0.0607	0.0376	0.1234	0.0407	0.0107	0.141	0.0627	0.0428	0.2636	0.1144	0.1141	-0.0225	0.2289	0.1935	Frith Wood A (GB Clone 43)
75		Fyne Court	-0.013	0.1262	-0.0311	0.0823	0.0634	0.0703	0.0557	0.0269	0.0254	0.0221	0.0408	0.0573	0.1353	0.0111	-0.0236	0.1457	-0.0437	-0.0041	0.0295	-0.0634	0.0523	-0.0614	-0.1328	0.0079	-0.0088	-0.0195	0.0629	-0.0177	-0.0112	0.1013	-0.0079	-0.0119	0.1703	0.0263	0.0651	-0.103	0.0077	0.1852	Fyne Court
76		Gall Pond Knoll	0.1887	0.3188	0.1889	0.2253	0.1596	0.2051	0.2518	0.1915	0.1378	0.1491	0.2027	0.2451	0.1958	0.2265	0.1709	0.2779	0.1639	0.1347	0.1289	0.2114	0.1781	0.1096	0.1627	0.1335	0.2186	0.1898	0.2496	0.1471	0.1428	0.3173	0.2336	0.1858	0.3413	0.2335	0.2736	0.1094	0.3588	0.3573	Gall Pond Knoll
77		Garratts Farm	0.1021	0.1838	0.0615	0.1644	0.124	0.1306	0.1431	0.1341	0.0781	0.0656	0.1118	0.1923	0.1523	0.0989	0.0438	0.1602	0.0601	0.0545	0.1345	0.0504	0.0992	0.054	0.0163	0.1139	0.1303	0.0595	0.1384	0.0863	0.12	0.2279	0.0888	0.0754	0.221	0.1314	0.1475	0.0645	0.0542	0.3083	Garratts Farm
78		Gastons Copse (GB Clone 45)	0.1844	0.2952	0.1677	0.1475	0.1731	0.1949	0.2017	0.1618	0.1731	0.1665	0.1716	0.1176	0.2166	0.2423	0.1218	0.2731	0.1501	0.1474	0.1091	0.163	0.2307	0.0453	0.0829	0.0622	0.1588	0.1647	0.2553	0.094	0.0032	0.2801	0.1148	0.162	0.3958	0.1814	0.2337	0.0927	0.3167	0.332	Gastons Copse (GB Clone 45)
79		Glanmore	0.0276	0.1292	0.0167	0.1306	0.1029	0.0654	0.1246	0.0736	0.0337	0.0146	0.0844	0.1276	0.1662	0.1749	0.0044	0.121	0.0825	0.0859	0.0298	0.1159	0.0875	0.0378	-0.0714	0.06	0.0761	0.0325	0.0534	0.0081	-0.0699	0.162	0.0471	-0.0142	0.3254	0.0866	0.1023	-0.0517	0.2238	0.2376	Glanmore
80		Glen	0.0936	0.1749	0.0687	0.1663	0.1262	0.0965	0.1571	0.1548	0.0764	0.0754	0.1225	0.2173	0.1669	0.1941	0.057	0.1276	0.1082	0.1116	0.1083	0.1335	0.0298	0.0702	0.0501	0.1628	0.1629	0.1084	0.0881	0.114	0.1261	0.2736	0.1718	0.0794	0.2875	0.1962	0.1919	0.0645	0.2034	0.2916	Glen
81		Glenealy	0.1181	0.2472	0.0935	0.1454	0.0866	0.1437	0.1378	0.1027	0.0975	0.0929	0.0831	0.1159	0.1221	0.1762	0.0507	0.1842	0.0924	0.0679	0.0302	0.0109	0.0761	-0.0325	-0.02	-0.0123	0.0741	0.0923	0.155	-0.0008	0.0276	0.2102	0.0923	0.0941	0.3072	0.1188	0.1807	0.0421	0.1976	0.3142	Glenealy
82		Godinton	0.0767	0.2054	0.078	0.2019	0.1363	0.1447	0.1604	0.1663	0.1212	0.1012	0.1458	0.237	0.2018	0.2075	0.0754	0.1724	0.1126	0.1388	0.1112	0.1	0.0691	0.0209	0.0363	0.133	0.1109	0.0956	0.0789	0.0943	0.1121	0.2403	0.1598	0.0855	0.299	0.211	0.2324	0.0553	0.2311	0.2756	Godinton
83		Gordon Castle (GB Clone 46)	0.0378	0.1111	0.0081	0.1422	0.1715	0.0269	0.1347	0.0748	0.0383	-0.0177	0.074	0.1873	0.2231	0.1607	-0.0363	0.1394	0.0493	0.1236	0.1032	0.1365	0.0656	0.0234	0.018	0.152	0.1827	0.0876	0.0927	0.1351	0.0872	0.2659	0.1523	0.0655	0.3333	0.1909	0.21	-0.036	0.2159	0.3191	Gordon Castle (GB Clone 46)
84		Greybury Wood (GB Clone 48)	0.0211	0.2314	0.0833	0.1465	0.0604	0.0707	0.0767	0.1325	-0.0217	0.0729	0.0449	0.1203	0.1393	0.0887	0.0153	0.1167	-0.0525	-0.0515	0.018	-0.0451	0.0724	-0.1173	-0.11	-0.0833	-0.0163	0.0005	0.0801	-0.1269	-0.0054	0.1849	0.0044	0.0291	0.1485	0.0172	0.1408	-0.0629	-0.0052	0.247	Greybury Wood (GB Clone 48)
85		Gurteen	0.0522	0.1744	0.0992	0.1396	0.0449	0.0897	0.093	0.1239	0.0332	0.0749	0.0716	0.1408	0.1075	0.0964	0.0541	0.1218	0.0321	0.0543	0.0575	0.0812	0.0575	0.0194	0.0541	-0.0095	0.0641	0.0306	0.1764	0.0241	0.0431	0.2028	0.0913	0.0603	0.1975	0.0933	0.1531	-0.0283	0.155	0.2083	Gurteen
86		Hadleigh Great Wood	0.1303	0.2038	0.1917	0.2295	0.1965	0.1235	0.143	0.1941	0.1819	0.231	0.1656	0.2362	0.2464	0.2166	0.2246	0.1491	0.153	0.2059	0.2266	0.1759	0.2806	0.1909	0.1201	0.1578	0.0926	0.1678	0.26	0.1345	0.1213	0.1226	0.0263	0.1463	0.3796	0.1475	0.1713	0.1287	0.2452	0.2164	Hadleigh Great Wood
87		Hagley Hall	0.071	0.1739	0.0709	0.1474	0.1007	0.1064	0.1006	0.1258	0.1023	0.0856	0.0841	0.1716	0.1297	0.1418	0.0636	0.1123	0.0864	0.1159	0.1121	0.0558	0.0696	0.0422	0.0229	0.108	0.1009	0.0507	0.0841	0.0334	0.0797	0.1929	0.0705	0.0613	0.2453	0.1071	0.1321	0.0551	0.1234	0.2622	Hagley Hall
88		Hall A (GB Clone 49)	0.0642	0.1495	0.0156	0.1779	0.1409	0.1372	0.1688	0.1354	0.1138	0.0484	0.1165	0.1931	0.1642	0.1771	0.0416	0.2001	0.1027	0.1111	0.0963	0.0469	0.0973	0.0139	-0.0084	0.0948	0.0764	0.0614	0.0528	0.0825	0.0672	0.1653	0.0968	0.0711	0.2989	0.18	0.2069	0.0407	0.2031	0.27	Hall A (GB Clone 49)
89		Halnaker Park	0.0548	0.1535	0.0317	0.1325	0.0983	0.0833	0.1168	0.0971	0.0343	0.0296	0.0704	0.1674	0.1523	0.1237	-0.0311	0.0894	0.0441	0.0944	0.0995	0.0535	0.0469	-0.005	0.0038	0.1169	0.1415	0.0525	0.0963	0.0681	0.077	0.2435	0.1096	0.0706	0.2056	0.1	0.1599	-0.0226	0.0973	0.3187	Halnaker Park
90		Halswell Park	0.1148	0.2396	0.1258	0.2326	0.1651	0.2092	0.2193	0.216	0.1451	0.1359	0.2032	0.2582	0.2299	0.2737	0.0891	0.2432	0.1926	0.1616	0.1389	0.193	0.1053	0.1204	0.1131	0.1879	0.177	0.1699	0.061	0.1049	0.1374	0.3101	0.1819	0.143	0.4153	0.2538	0.2079	0.1206	0.3337	0.3132	Halswell Park
91		Harrow Hill	0.0375	0.2505	0.0813	0.115	0.0138	0.0993	0.114	0.0591	-0.0084	0.0522	0.0738	0.0948	0.0841	0.1165	0.01	0.1881	0.016	0	-0.0837	-0.0118	0.0806	-0.2501	-0.0429	-0.0733	0.0127	0.0646	0.0829	-0.0744	-0.0415	0.2123	0.0814	0.0575	0.2834	0.0924	0.153	-0.0356	0.2376	0.2759	Harrow Hill
92		Hawker's Grove (GB Clone 51)	0.1075	0.1183	0.0836	0.1804	0.1389	0.0949	0.1589	0.1498	0.1515	0.0886	0.1401	0.1947	0.1926	0.1341	0.1292	0.1717	0.0572	0.1622	0.1175	0.1756	0.173	0.189	0.1366	0.1107	0.1499	0.1007	0.2208	0.1534	0.1449	0.1471	0.0964	0.1262	0.2208	0.1803	0.2049	0.066	0.2008	0.1772	Hawker's Grove (GB Clone 51)
93		Hermitage B (GB Clone 53)	0.0663	0.214	0.1055	0.121	0.0275	0.1365	0.0804	0.0905	0.0887	0.0889	0.1257	0.1276	0.1048	0.1145	0.0649	0.1766	0.0795	0.0948	0.0103	0.0695	0.0903	-0.0228	0.0227	0.0161	0.0778	0.0589	0.1456	-0.0007	-0.0017	0.232	0.0743	0.0624	0.2996	0.0776	0.0936	0.0108	0.2213	0.2494	Hermitage B (GB Clone 53)
94		Heveningham church	0.0211	0.1148	-0.0008	0.1402	0.1212	0.1134	0.0706	0.1126	0.087	-0.0385	0.0826	0.124	0.1604	0.1004	0.0044	0.1741	0.027	0.0993	0.0848	0.1041	0.1335	0.0485	0.0299	0.0678	0.0678	0.0136	0.073	0.0585	0.0144	0.1339	-0.0184	0.027	0.335	0.1177	0.1393	0.0301	0.2277	0.2592	Heveningham church
95		High Wood	0.0436	0.1783	0.063	0.1736	0.1389	0.1367	0.1493	0.1484	0.1149	0.0831	0.0898	0.1686	0.1888	0.1583	0.0464	0.2019	0.0759	0.1188	0.1307	-0.0175	0.1093	-0.0445	-0.0567	0.0736	0.015	0.0447	0.0224	-0.0021	0.0439	0.1241	-0.0248	0.0454	0.3	0.1325	0.1539	0.0441	0.1363	0.2246	High Wood
96		Highnam Wood	0.0538	0.1483	-0.001	0.1749	0.1118	0.1203	0.1401	0.1261	0.0861	0.0632	0.0933	0.1986	0.1602	0.1563	0.0309	0.1426	0.0966	0.0829	0.1024	0.0229	0.0591	-0.0036	-0.0671	0.1191	0.073	0.067	0.0167	0.0511	0.0698	0.1714	0.0772	0.0573	0.2649	0.1227	0.1403	0.0471	0.1256	0.2755	Highnam Wood
97		Hockley Wood	0.0698	0.1214	0.0551	0.1335	0.0722	0.1107	0.123	0.0998	0.0849	0.0698	0.0936	0.1517	0.1444	0.133	0.0526	0.1344	0.057	0.1123	0.0729	0.068	0.0972	0.0385	0.0105	0.0748	0.0867	0.0362	0.135	0.0819	0.0361	0.1814	0.0799	0.0572	0.194	0.1046	0.1375	0.014	0.1644	0.1928	Hockley Wood
98		Holbrook Park	0.0628	0.18	0.0615	0.1445	0.0791	0.1184	0.1264	0.1332	0.0959	0.0608	0.0802	0.1456	0.1259	0.1497	0.0205	0.1463	0.0797	0.0633	0.0629	0.0596	0.0375	0.0485	0.0107	0.0456	0.1061	0.0605	0.1125	0.0154	0.0718	0.2004	0.0955	0.0777	0.2432	0.135	0.1619	0.0212	0.1198	0.2558	Holbrook Park
99		Holnicote House	0.1303	0.1877	0.1488	0.2151	0.1681	0.1244	0.1559	0.2083	0.1891	0.1679	0.1157	0.2173	0.2124	0.2202	0.1775	0.1558	0.149	0.1927	0.1697	0.135	0.1914	0.1664	0.1381	0.1204	0.1204	0.1696	0.1932	0.1059	0.142	0.1467	0.0944	0.1731	0.3441	0.183	0.2041	0.1288	0.2654	0.2495	Holnicote House
100		Holt Hall	0.0443	0.1634	0.0481	0.2053	0.1173	0.1076	0.1219	0.1846	0.1328	0.066	0.0768	0.2182	0.1605	0.2054	0.0652	0.1189	0.1375	0.1398	0.1025	0.0565	0.0905	0.0546	0.0552	0.0959	0.0965	0.1	0.0781	0.0343	0.1068	0.1547	0.0972	0.1194	0.3143	0.1595	0.2029	0.0645	0.2004	0.2911	Holt Hall
101		Homers Down Plantation A (GB Clone 54)	0.081	0.1991	0.0649	0.2069	0.1836	0.1547	0.2131	0.1978	0.1117	0.0892	0.1658	0.2487	0.2279	0.2594	0.0588	0.2205	0.1956	0.17	0.1604	0.1557	0.1291	0.0519	0.0539	0.211	0.1568	0.1631	0.0513	0.118	0.1349	0.2745	0.1658	0.1353	0.4049	0.2372	0.2182	0.1361	0.3138	0.3523	Homers Down Plantation A (GB Clone 54)
102		Hope Mansell	0.038	0.1534	0.0636	0.137	0.1009	0.0311	0.0534	0.1303	0.0379	0.0562	0.0571	0.1565	0.1486	0.1335	0.0452	0.0553	0.0539	0.0569	0.0883	0.038	0.0827	0.0063	0.0064	0.0689	0.084	0.0778	0.1067	0.0157	0.0522	0.1771	0.0694	0.0856	0.2056	0.0697	0.1571	0.015	0.138	0.2443	Hope Mansell
103		Hope Wood	0.1389	0.2604	0.1385	0.1547	0.1521	0.1427	0.1624	0.1536	0.1097	0.1591	0.1981	0.1841	0.194	0.2384	0.0867	0.2281	0.1425	0.1631	0.1388	0.1556	0.1286	0.0598	0.005	0.2037	0.1594	0.1653	0.1197	0.1292	0.0799	0.3133	0.1625	0.1045	0.4227	0.2117	0.1894	0.114	0.3131	0.3464	Hope Wood
104		Hopleys Wood (GB Clone 56)	0.1363	0.228	0.0637	0.2071	0.1288	0.1288	0.1311	0.1809	0.0735	0.0379	0.0472	0.1998	0.1655	0.1807	-0.0011	0.1889	0.0668	0.0659	0.0929	0.0389	0.111	0.0598	-0.0152	0.0761	0.1311	0.0894	0.1974	0.0771	0.1174	0.253	0.1004	0.1167	0.3268	0.1459	0.1814	0.0808	0.0922	0.376	Hopleys Wood (GB Clone 56)
105		Howletts	0.0616	0.1878	0.0327	0.2041	0.1334	0.1172	0.1028	0.1669	0.0599	0.0722	0.113	0.2282	0.2093	0.1707	0.0122	0.1391	0.0806	0.0674	0.1157	0.053	0.0538	0.0021	-0.0197	0.1259	0.0403	0.0666	0.0326	0.0853	0.1111	0.2324	0.1307	0.0408	0.2862	0.1793	0.1939	0.0409	0.1548	0.2703	Howletts
106		Inch Wood	0.1352	0.1991	0.1058	0.2162	0.1752	0.1351	0.1219	0.1906	0.1101	0.1151	0.122	0.2358	0.1923	0.132	0.109	0.1366	0.086	0.0864	0.2169	0.0805	0.1706	0.1069	0.0632	0.1576	0.1393	0.0983	0.2001	0.1286	0.1626	0.23	0.0759	0.1121	0.2976	0.1468	0.1654	0.1327	0.0591	0.3418	Inch Wood
107		Island Wood	0.1566	0.2918	0.1227	0.1225	0.0326	0.1648	0.1505	0.0107	0.0621	0.1009	0.12	0.1033	0.0439	0.1872	0.0575	0.2558	0.1247	0.0243	-0.0464	0.077	0.1682	-0.0282	0.0369	0.0339	0.0578	0.1039	0.1901	0.0403	-0.0449	0.2259	0.1326	0.0674	0.3784	0.1363	0.1535	0.0495	0.2969	0.2809	Island Wood
108		Issac Newton (GB Clone 59)	0.0076	0.1019	0.0109	0.1392	0.0634	0.0597	0.0682	0.0946	0.0374	0.0067	0.0447	0.1158	0.1291	0.0879	-0.0352	0.0937	-0.0395	0.0427	0.0018	0.0104	0.0361	-0.0442	-0.0632	-0.0752	0.0397	-0.0598	0.1137	-0.0339	-0.0112	0.172	-0.012	-0.0164	0.2032	0.078	0.113	-0.0736	0.0013	0.2262	Issac Newton (GB Clone 59)
109		Johnson Wood	0.0407	0.1783	0.0782	0.1521	0.0691	0.0907	0.1306	0.124	0.0558	0.073	0.096	0.1914	0.1284	0.1422	0.0609	0.1171	0.0954	0.0752	0.0859	0.074	0.0686	0.0051	0.0516	0.0826	0.1018	0.1071	0.1158	0.0356	0.0927	0.2146	0.1104	0.0991	0.2978	0.1401	0.1628	0.0482	0.2038	0.2755	Johnson Wood
110		Kateshill Ho, Bewdley	0.0755	0.2136	0.1044	0.1589	0.1962	0.1524	0.2137	0.1419	0.1538	0.1272	0.1888	0.2104	0.2881	0.2197	0.0681	0.2374	0.1605	0.2213	0.1641	0.1718	0.1565	0.0974	0.0616	0.2185	0.1946	0.1811	0.1796	0.1747	0.169	0.318	0.2083	0.1585	0.4133	0.2551	0.241	0.0592	0.2825	0.3605	Kateshill Ho, Bewdley
111		Kentchurch Park	0.1005	0.153	0.0607	0.2218	0.1129	0.1091	0.1007	0.1618	0.0804	0.1162	0.1344	0.2418	0.1615	0.1762	0.0905	0.1106	0.0382	0.1533	0.1024	0.1498	0.1172	0.0864	0.0241	0.1688	0.0639	0.0367	0.1081	0.146	0.1213	0.2327	0.1398	0.0313	0.274	0.1614	0.1835	0.0352	0.1708	0.2426	Kentchurch Park
112		Kilndown Wood	0.0961	0.2222	0.1183	0.0708	0.0705	0.1181	0.0776	0.0762	0.0382	0.0469	0.0715	0.0796	0.0733	0.0653	0.078	0.1825	0.0127	0.0108	0.0822	0.0986	0.1312	0.0612	0.0336	0.0587	0.106	0.0458	0.2053	0.0548	0.0312	0.1913	0.0584	0.0298	0.3034	0.1023	0.0838	0.0386	0.168	0.2515	Kilndown Wood
113		Kilnwood Copse, Horsham	0.2298	0.2751	0.191	0.2587	0.2548	0.2157	0.259	0.2278	0.224	0.2124	0.2301	0.2909	0.2983	0.2776	0.1492	0.2691	0.2143	0.2409	0.2447	0.1742	0.153	0.21	0.122	0.2609	0.2644	0.2102	0.2133	0.2067	0.2077	0.3677	0.2265	0.2011	0.4134	0.2836	0.2743	0.1807	0.2957	0.3872	Kilnwood Copse, Horsham
114		Kilsham Copse (GB Clone 60)	0.0775	0.2434	0.0912	0.1598	0.0843	0.1553	0.1065	0.103	0.0767	0.1131	0.0901	0.1063	0.1731	0.1456	0.0314	0.2009	0.0928	0.0725	0.0261	0.0159	0.1029	-0.0492	-0.0429	-0.0032	0.0554	0.0509	0.1626	-0.0426	-0.0054	0.2649	0.1034	0.0915	0.3535	0.0924	0.1026	-0.0092	0.2219	0.2984	Kilsham Copse (GB Clone 60)
115		Kilshane	0.1663	0.2722	0.1488	0.2028	0.1537	0.2127	0.158	0.1787	0.1264	0.1396	0.1823	0.235	0.1618	0.1592	0.1575	0.2132	0.133	0.1167	0.1871	0.1367	0.176	0.1013	0.1052	0.1769	0.1269	0.1024	0.192	0.1345	0.1462	0.2654	0.1434	0.0864	0.3416	0.176	0.1603	0.1578	0.2179	0.334	Kilshane
116		L Edney Wood, Writtle Park	0.0495	0.086	0.049	0.1822	0.1261	0.0181	0.0922	0.1501	0.0457	0.0457	0.0863	0.2026	0.1778	0.1012	0.0601	0.0562	0.0417	0.0656	0.1574	0.115	0.1238	0.1246	0.0782	0.1169	0.1205	0.0733	0.1662	0.108	0.1248	0.1948	0.06	0.0776	0.208	0.1267	0.135	0.0621	0.1159	0.2323	L Edney Wood, Writtle Park
117		Lake Plantation (GB Clone 61)	0.1163	0.1948	0.0472	0.1557	0.0805	0.1061	0.1098	0.1092	0.1012	0.059	0.0585	0.1382	0.1393	0.1267	0.0514	0.1798	0.027	0.0577	0.0375	0.0765	0.1093	0.0231	-0.0353	0.023	0.102	0.0795	0.2099	0.0872	0.0517	0.2067	0.0741	0.0929	0.307	0.1251	0.1467	0.0486	0.1646	0.288	Lake Plantation (GB Clone 61)
118		Larkey Valley L35 (GB Clone 62)	0.1493	0.1968	0.0876	0.1463	0.1454	0.1101	0.1339	0.1244	0.1054	0.0527	0.1015	0.1893	0.1274	0.1314	0.0806	0.1297	0.0825	0.1168	0.1548	0.0841	0.1153	0.1296	0.0471	0.1514	0.185	0.0501	0.1569	0.1073	0.105	0.2373	0.0939	0.0511	0.2307	0.0907	0.1357	0.0873	0.0758	0.3434	Larkey Valley L35 (GB Clone 62)
119		Leeds 1 (GB Clone 65)	0.1424	0.258	0.1332	0.2031	0.1397	0.2225	0.1727	0.1767	0.1447	0.1467	0.1615	0.1825	0.1942	0.1633	0.1261	0.2543	0.1004	0.1257	0.126	0.0384	0.2138	-0.0067	0.0663	0.054	0.0543	0.0999	0.2003	0.0955	0.0647	0.1989	0.0713	0.1039	0.3043	0.1636	0.1808	0.1003	0.2393	0.2843	Leeds 1 (GB Clone 65)
120		Lesnes Abbey	0.0662	0.1792	0.0845	0.1779	0.0866	0.0982	0.1452	0.1747	0.0518	0.0688	0.1033	0.2248	0.1157	0.1715	0.0883	0.11	0.0894	0.1	0.1069	0.133	0.0676	0.0998	0.0684	0.1377	0.1636	0.0861	0.1274	0.0887	0.1296	0.2324	0.1465	0.1065	0.2047	0.1515	0.1719	0.0356	0.1586	0.2849	Lesnes Abbey
121		Little Drybrook	0.1033	0.2592	0.1697	0.1443	0.119	0.1531	0.183	0.11	0.084	0.1224	0.1128	0.1286	0.1644	0.1826	0.0812	0.2563	0.0863	0.083	0.064	0.1104	0.1701	-0.0449	0.0425	-0.0124	0.1024	0.1017	0.2362	0.0305	-0.0172	0.276	0.1367	0.1381	0.3782	0.1748	0.2254	0.0159	0.3073	0.2817	Little Drybrook
122		Little Staple Edge	0.054	0.285	0.1256	0.2166	0.1356	0.1887	0.158	0.1821	0.1344	0.1601	0.1545	0.2012	0.2088	0.2285	0.0827	0.2256	0.1492	0.1402	0.0866	-0.0197	0.0373	-0.0863	-0.044	0.0764	0.0515	0.1096	0.0173	-0.0346	0.0803	0.2655	0.1377	0.0959	0.4004	0.1766	0.2255	0.0162	0.2535	0.3341	Little Staple Edge
123		Littledean Camp Mill Grove	0.104	0.1638	0.1012	0.1758	0.1042	0.1417	0.1483	0.1616	0.0935	0.1141	0.1241	0.1889	0.1526	0.1525	0.1162	0.1539	0.069	0.1288	0.1415	0.0779	0.1577	0.0743	0.0505	0.1138	0.0796	0.0735	0.1502	0.1094	0.0919	0.1455	0.0623	0.0868	0.1677	0.1169	0.145	0.0783	0.1727	0.218	Littledean Camp Mill Grove
124		Littledean Hall	0.0961	0.1243	0.0627	0.2198	0.1376	0.0857	0.0889	0.173	0.0932	0.1045	0.0931	0.2353	0.1754	0.0924	0.0985	0.0869	0.0632	0.0716	0.1805	0.0374	0.1252	0.1106	0.0559	0.1176	0.0658	0.0738	0.1665	0.1108	0.1515	0.164	0.0576	0.0762	0.2326	0.1265	0.1584	0.1033	0.0156	0.2629	Littledean Hall
125		Littledean Hall farm	0.0836	0.1723	0.0551	0.1819	0.1511	0.0331	0.1104	0.1571	-0.0123	0.0521	0.0888	0.2277	0.1928	0.1315	0.0517	0.0988	0.0241	0.0015	0.1447	0.0842	0.0573	0.062	-0.0054	0.1507	0.1317	0.0825	0.1388	0.1282	0.1381	0.2631	0.1451	0.0542	0.2413	0.1726	0.1868	0.0453	0.0899	0.2913	Littledean Hall farm
126		Lizard Wood 1 (GB Clone 67)	0.0442	0.139	0.0381	0.0672	0.0976	0.0867	0.0768	0.0881	0.0778	0.0265	0.0531	0.0945	0.1304	0.0992	0.0293	0.1188	0.058	0.1002	0.0962	0.0447	0.0878	0.0004	-0.0226	0.0994	0.1031	0.0434	0.093	0.044	0.0267	0.1542	0.0266	0.036	0.2448	0.0624	0.0744	0.0205	0.1146	0.2423	Lizard Wood 1 (GB Clone 67)
127		Llanfihangel Crucorney	0.0539	0.1739	0.063	0.1421	0.1116	0.1107	0.1457	0.1254	0.0802	0.0771	0.1024	0.1586	0.1459	0.1594	0.0604	0.1424	0.0915	0.0769	0.0873	0.0657	0.0848	0.0129	0.0326	0.0706	0.0819	0.0945	0.0905	0.0423	0.0714	0.157	0.1053	0.0958	0.2519	0.1469	0.1914	0.0142	0.1905	0.2475	Llanfihangel Crucorney
128		Lodge Wood (GB Clone 70)	0.1027	0.224	0.1099	0.1434	0.1122	0.1037	0.1003	0.1058	0.0942	0.0996	0.0808	0.113	0.1888	0.1716	0.0363	0.1836	0.0759	0.1282	0.0525	0.0797	0.0446	0.0003	0.0112	0.0377	0.0902	0.0978	0.1438	0.0181	-0.026	0.2288	0.0724	0.0764	0.3594	0.1202	0.1539	-0.0194	0.2576	0.2739	Lodge Wood (GB Clone 70)
129		Long Plantation A (Sch 305-02) (GB Clone 71)	-0.0056	0.1147	0.0018	0.1451	0.0623	0.071	0.0935	0.1061	0.0737	0.059	0.1028	0.1711	0.1142	0.1423	0.0435	0.1092	0.0722	0.0818	0.0339	0.0432	0.0413	0.0111	0.0096	0.0642	0.02	0.0538	-0.0005	0.0138	0.0441	0.1305	0.0634	0.0348	0.2651	0.1361	0.1476	-0.0018	0.1846	0.1789	Long Plantation A (Sch 305-02) (GB Clone 71)
130		Longhope	0.1541	0.2689	0.111	0.1904	0.0783	0.1241	0.1364	0.1567	0.0342	0.0634	0.0551	0.1904	0.0739	0.184	0.0723	0.1982	0.0668	0.0801	0.0533	0.0013	0.1001	0.042	-0.0152	0.078	0.1384	0.0706	0.1845	0.0726	0.099	0.2516	0.1326	0.0955	0.2638	0.1087	0.1663	0.0587	0.149	0.3738	Longhope
131		Longleat (GB Clone 74)	0.0707	0.2018	0.0975	0.1392	0.021	0.1269	0.1168	0.0981	0.0682	0.0989	0.0912	0.1266	0.0353	0.1503	0.1067	0.1865	0.0377	0.1052	0.0018	0.0978	0.1647	0.0003	0.0111	0.0165	-0.0312	0.0005	0.1512	0.0326	-0.0319	0.0908	0.0542	0.0122	0.2579	0.1044	0.1359	-0.0403	0.2333	0.1107	Longleat (GB Clone 74)
132		Lorden Copse	0.075	0.2706	0.1516	0.1422	0.0783	0.1194	0.0933	0.1473	0.0464	0.0669	0.0832	0.1543	0.1055	0.1136	0.096	0.1737	0.0421	0.0801	0.0717	0.1093	0.0576	0.0197	0.0491	0.0484	0.1525	0.059	0.1956	0.0031	0.07	0.2743	0.1004	0.0518	0.3536	0.1113	0.1403	0.0111	0.186	0.3392	Lorden Copse
133		Lullingstone woods	0.073	0.119	0.0474	0.2007	0.1551	0.089	0.147	0.159	0.1304	0.0515	0.0815	0.2273	0.202	0.1851	0.011	0.1287	0.1195	0.13	0.1549	0.0858	0.0802	0.0777	0.0408	0.132	0.165	0.088	0.1137	0.0911	0.1315	0.2485	0.1027	0.0998	0.3151	0.1714	0.1905	0.0803	0.1126	0.3258	Lullingstone woods
134		Luton Hoo	0.0293	0.156	0.0366	0.1505	0.1259	0.1002	0.1344	0.1202	0.0996	0.0571	0.1164	0.1816	0.1921	0.1599	0.012	0.141	0.0609	0.1251	0.1093	0.0902	0.0262	0.045	-0.0331	0.1267	0.108	0.0474	0.0638	0.0578	0.0878	0.2063	0.1164	0.0623	0.2706	0.1721	0.2131	0.0087	0.1588	0.2561	Luton Hoo
135		Luxon Wood (GB Clone 75)	0.077	0.1698	0.0525	0.1465	0.1152	0.1012	0.1079	0.0846	0.0687	0.041	0.004	0.124	0.1604	0.1267	-0.0123	0.176	0.0233	0.0541	0.095	-0.0851	0.1369	-0.0707	-0.0714	0.0057	0.0196	0.0221	0.1229	0.0081	0.0032	0.1319	-0.0227	0.0434	0.2727	0.0757	0.1243	0.0206	0.0793	0.2739	Luxon Wood (GB Clone 75)
136		Lydney Meend	0.0946	0.1873	0.0508	0.1765	0.1345	0.1541	0.1399	0.153	0.1275	0.1044	0.1368	0.1828	0.2024	0.1431	0.0537	0.1942	0.0918	0.1057	0.1346	0.0617	0.0931	0.065	0.0237	0.12	0.0802	0.0784	0.0727	0.0876	0.1065	0.2023	0.079	0.0569	0.2512	0.1455	0.1509	0.0697	0.1445	0.2455	Lydney Meend
137		Lydney Park	0.1066	0.1764	0.06	0.2039	0.1403	0.15	0.1675	0.1802	0.1059	0.0855	0.1331	0.2277	0.1815	0.1868	0.0554	0.1634	0.1243	0.102	0.1339	0.0902	0.0627	0.089	0.0435	0.1433	0.1347	0.1001	0.0789	0.0979	0.1355	0.2397	0.1309	0.1019	0.2594	0.1847	0.1792	0.0925	0.1674	0.2845	Lydney Park
138		Margam	0.0811	0.1049	0.073	0.2343	0.2201	0.0295	0.1317	0.2003	0.1366	0.104	0.1172	0.2826	0.2633	0.1686	0.1268	0.0571	0.0769	0.1829	0.2275	0.1506	0.1318	0.1696	0.0917	0.2001	0.179	0.0921	0.1543	0.1747	0.1952	0.2061	0.1235	0.0967	0.2166	0.1932	0.2332	0.0614	0.0848	0.2622	Margam
139		Marsh Lane	0.0335	0.1399	0.0326	0.1545	0.1233	0.0863	0.128	0.128	0.0415	0.0057	0.082	0.1638	0.2067	0.1641	-0.0259	0.1465	0.0659	0.0915	0.0863	0.121	0.0619	-0.0035	0.0245	0.0984	0.087	0.0837	0.099	0.084	0.046	0.2092	0.1132	0.0768	0.3049	0.1767	0.2035	0.01	0.2553	0.2312	Marsh Lane
140		Martlesham Plantation (GB Clone 76)	-0.0616	0.1663	-0.0128	0.0799	0.0608	0.012	0.0729	0.0434	-0.0547	-0.0134	0.0371	0.1063	0.1114	0.1051	-0.0542	0.1083	0.0045	0.0082	-0.0237	-0.0062	-0.1023	-0.159	-0.128	0.0188	0.0423	0.0158	-0.0403	-0.0511	0.0032	0.2026	0.095	-0.0304	0.2889	0.1029	0.1472	-0.1706	0.1378	0.2671	Martlesham Plantation (GB Clone 76)
141		Mereworth	0.2023	0.2176	0.1502	0.2166	0.2489	0.1988	0.1796	0.2079	0.2016	0.0916	0.2138	0.2478	0.2517	0.1479	0.1963	0.2456	0.1069	0.2621	0.2514	0.2831	0.2547	0.2706	0.1807	0.2701	0.2704	0.1252	0.3043	0.2733	0.2162	0.2861	0.1587	0.1258	0.4017	0.2248	0.1953	0.1681	0.2719	0.3806	Mereworth
142		Mill Hill	0.1525	0.2198	0.1544	0.2058	0.206	0.1575	0.2246	0.2251	0.1533	0.1679	0.205	0.2167	0.249	0.1803	0.1647	0.221	0.0985	0.1457	0.1997	0.1527	0.2033	0.1588	0.0817	0.1405	0.1673	0.1186	0.2454	0.1492	0.1609	0.2669	0.1302	0.127	0.2243	0.2062	0.2223	0.111	0.1363	0.2791	Mill Hill
143		Mill Wood (GB Clone 77)	0.0468	0.1245	0.039	0.1465	0.1417	0.0408	0.1173	0.1092	0.0456	0.0068	0.035	0.1311	0.2254	0.1549	-0.0067	0.0849	0.0379	0.1251	0.0882	0.1071	0.0363	-0.0037	-0.0216	0.0252	0.0922	0.0386	0.0801	0.0231	-0.0141	0.1901	0.0281	0.0014	0.2875	0.0892	0.1452	-0.0629	0.2159	0.2439	Mill Wood (GB Clone 77)
144		Mintching Wood A (GB Clone 78)	0.1821	0.2592	0.2341	0.1806	0.2185	0.2067	0.1893	0.1797	0.2154	0.1721	0.2371	0.2134	0.2268	0.1313	0.2212	0.2671	0.0928	0.2591	0.2437	0.2649	0.236	0.2527	0.1904	0.2197	0.246	0.076	0.2866	0.1715	0.1635	0.3085	0.1083	0.1023	0.3639	0.19	0.1754	0.1249	0.2259	0.2901	Mintching Wood A (GB Clone 78)
145		Nagshead	0.0616	0.1859	0.0496	0.1084	0.0539	0.0674	0.0488	0.0731	-0.0162	-0.0184	0.0634	0.1362	0.0738	0.0466	0.0215	0.1112	-0.0125	-0.0073	0.0597	0.0507	0.0676	-0.0063	0.0154	0.055	0.0695	-0.0014	0.105	0.0363	0.0287	0.1945	0.0466	-0.0133	0.2228	0.0679	0.1005	0.02	0.1445	0.2592	Nagshead
146		Nailbridge	0.1404	0.245	0.1316	0.1847	0.0706	0.1886	0.1447	0.1653	0.0973	0.1252	0.1066	0.1669	0.1067	0.1805	0.1071	0.1887	0.0927	0.0825	0.0884	0.1053	0.1399	0.0771	0.0604	0.057	0.0539	0.0655	0.2142	0.0826	0.0639	0.1936	0.1175	0.0841	0.2675	0.1482	0.153	0.0646	0.206	0.2433	Nailbridge
147		Nashdom A (GB Clone 80)	0.0588	0.0448	0.0417	0.1398	0.1672	0.0459	0.1212	0.1207	0.1529	0.0907	0.0953	0.1671	0.196	0.1321	0.0673	0.0793	0.0687	0.1769	0.1777	0.1266	0.1341	0.1694	0.0809	0.1582	0.145	0.0892	0.1582	0.1311	0.1412	0.1544	0.0757	0.0992	0.2682	0.1587	0.1781	0.0417	0.1008	0.2336	Nashdom A (GB Clone 80)
148		Nettlecombe Park	0.0923	0.2063	0.0826	0.1645	0.1018	0.116	0.1398	0.1383	0.0541	0.0756	0.0992	0.1925	0.1517	0.1935	0.064	0.1654	0.1162	0.0699	0.083	0.0921	0.0904	0.0084	0.0347	0.1092	0.0877	0.1184	0.1133	0.0878	0.057	0.2039	0.1286	0.0821	0.3163	0.1787	0.1708	0.0635	0.2621	0.2583	Nettlecombe Park
149		Neuadd, Cwmdu	0.0865	0.1237	0.0318	0.1811	0.1301	0.079	0.1309	0.1642	0.0519	0.0133	0.0271	0.1977	0.1604	0.1221	0.0541	0.1305	0.0275	0.086	0.1497	0.1114	0.1497	0.099	0.0209	0.125	0.1314	0.0598	0.1799	0.1337	0.1079	0.1306	0.0576	0.0972	0.1893	0.124	0.1472	0.0522	0.0969	0.2601	Neuadd, Cwmdu
150		Norsey Wood	0.0619	0.1755	0.0782	0.154	0.0745	0.136	0.1331	0.1438	0.0851	0.0722	0.097	0.1577	0.1284	0.1471	0.0496	0.1572	0.0568	0.0725	0.0676	0.0877	0.0759	0.0208	0.0251	0.0309	0.0875	0.0638	0.1249	0.0295	0.0506	0.2011	0.0847	0.1049	0.2301	0.1251	0.1804	0.0104	0.1737	0.234	Norsey Wood
151		Nower Wood (GB Clone 82)	0.0146	0.1234	-0.0222	0.2099	0.166	0.0846	0.1107	0.1629	0.1097	0.0303	0.0796	0.2207	0.2406	0.203	0.0156	0.1718	0.0967	0.183	0.086	0.0988	0.0412	0.0598	-0.0434	0.1568	0.12	0.0782	0.0062	0.0966	0.092	0.2116	0.1295	0.0789	0.3581	0.1888	0.1947	0.001	0.232	0.2837	Nower Wood (GB Clone 82)
152		Obelisk A (GB Clone 84)	0.0506	0.0744	0.0318	0.1761	0.1057	0.071	0.1029	0.131	0.1163	0.0748	0.131	0.1908	0.1712	0.1308	0.0686	0.1162	0.0526	0.1515	0.0647	0.1331	0.1074	0.108	0.0874	0.0761	0.0641	0.0683	0.1302	0.0962	0.0855	0.1416	0.0814	0.0693	0.2454	0.16	0.1782	0.0174	0.1955	0.151	Obelisk A (GB Clone 84)
153		Old Bracknell Rd	0.1821	0.2644	0.1838	0.1629	0.1455	0.1766	0.1103	0.1494	0.1019	0.1067	0.1656	0.1666	0.1309	0.124	0.2039	0.2595	0.0928	0.1227	0.1619	0.1834	0.2759	0.1447	0.14	0.1416	0.0575	0.0704	0.2691	0.168	0.0647	0.1925	0.0691	-0.0211	0.3984	0.1522	0.0811	0.1655	0.3009	0.233	Old Bracknell Rd
154		Parkhill Inclosure	0.0639	0.1779	0.0535	0.1432	0.1417	0.1362	0.1174	0.1174	0.1175	0.1028	0.1352	0.1617	0.1862	0.1082	0.0803	0.159	0.0651	0.1202	0.1377	0.0633	0.0913	0.0296	0.011	0.1243	0.1192	0.0622	0.1288	0.0982	0.0948	0.2222	0.097	0.0559	0.2986	0.1444	0.1488	0.0039	0.1421	0.2894	Parkhill Inclosure
155		Pencalenick (GB Clone 86)	0.0143	0.1493	0.0109	0.0678	0.0734	0.0321	0.0578	0.0582	-0.0538	0.0145	0.0408	0.0447	0.1594	0.0064	-0.0716	0.1248	-0.14	-0.0335	0.0295	-0.035	0.0442	-0.1021	-0.1411	-0.0214	0.0008	-0.0173	0.0981	0.0106	0.0143	0.1577	0.0144	-0.0052	0.1265	0.0642	0.1223	-0.097	-0.0052	0.2196	Pencalenick (GB Clone 86)
156		Penny Hill	0.0533	0.1855	0.0309	0.1598	0.071	0.0353	0.0187	0.0995	0.0729	0.0837	0.0351	0.1463	0.1245	0.124	0.0366	0.0733	0.0764	0.076	0.0529	-0.0898	0.0844	-0.0668	-0.0723	0.0379	-0.0289	0.0723	0.0922	0.003	0.0672	0.1422	0.0454	0.0672	0.3135	0.087	0.1232	0.0398	0.157	0.273	Penny Hill
157		Penshurst Collinses Toll	0.0785	0.2298	0.125	0.175	0.1042	0.142	0.1833	0.1656	0.0964	0.11	0.1498	0.1955	0.1501	0.1868	0.1226	0.2005	0.1096	0.1094	0.0755	0.1531	0.1215	0.0527	0.0966	0.0717	0.1291	0.13	0.1681	0.0659	0.094	0.2206	0.1558	0.1371	0.2904	0.1939	0.2244	0.0407	0.2808	0.2593	Penshurst Collinses Toll
158		Pentillie A (GB Clone 87)	0.0992	0.1886	0.076	0.1413	0.1061	0.1235	0.1119	0.1306	0.0515	0.0702	0.0905	0.1393	0.1644	0.1359	0.0251	0.1953	0.0364	0.0193	0.081	0.0653	0.1182	0.0274	0.0139	0.0278	0.0182	0.042	0.141	0.0695	0.0355	0.1676	0.0617	0.0356	0.2233	0.1441	0.1578	0.0373	0.151	0.1841	Pentillie A (GB Clone 87)
159		Pentwyn	0.0373	0.0659	0.0195	0.1677	0.0706	0.0627	0.1079	0.1453	0.0173	-0.0385	0.0124	0.1554	0.1204	0.1193	-0.0067	0.1123	-0.0112	0.1059	0.0599	0.1385	0.1093	0.0658	0.0596	0.0273	0.1077	0.0178	0.1677	0.0936	0.0491	0.1849	0.0635	0.0801	0.2348	0.0998	0.1693	-0.0142	0.1995	0.2681	Pentwyn
160		Perton Wood, Stoke Edith	0.128	0.2506	0.128	0.2154	0.117	0.1599	0.1172	0.1867	0.1171	0.157	0.129	0.2258	0.1779	0.2006	0.1103	0.1746	0.1304	0.1239	0.1354	0.0472	0.1639	0.033	0.0588	0.1038	0.0244	0.1005	0.1485	0.094	0.1226	0.2145	0.1245	0.0987	0.2982	0.1695	0.19	0.1017	0.2088	0.2811	Perton Wood, Stoke Edith
161		Petridges A (GB Clone 89)	-0.005	0.1195	0.0316	0.065	0.0768	0.0913	0.1304	0.0497	0.0648	0.0625	0.1017	0.0772	0.1461	0.1392	0.0076	0.1475	0.0954	0.1003	0.0572	0.0708	0.0687	0.007	-0.0345	0.0722	0.0502	0.0605	0.0736	0.0288	0.0271	0.1377	0.0583	0.0256	0.3198	0.1367	0.1065	-0.0337	0.2089	0.203	Petridges A (GB Clone 89)
162		Philip's Wood	0.0774	0.2008	0.0906	0.1472	0.1268	0.0897	0.157	0.1556	0.0967	0.0785	0.1172	0.1911	0.1635	0.2094	0.04	0.1469	0.143	0.1168	0.1075	0.116	0.0274	0.0562	0.0531	0.1385	0.1853	0.1217	0.1294	0.051	0.0997	0.2941	0.1543	0.1097	0.342	0.1809	0.1956	0.0616	0.2146	0.3324	Philip's Wood
163		Phillips House, Dinton	0.1141	0.2536	0.1261	0.2456	0.1556	0.2014	0.1932	0.215	0.1716	0.1452	0.1586	0.2509	0.2103	0.237	0.1005	0.2192	0.1619	0.1638	0.14	0.0576	0.1477	-0.0128	0.0662	0.1094	0.1212	0.125	0.1182	0.0589	0.1213	0.256	0.128	0.1463	0.3481	0.2036	0.2388	0.1157	0.2305	0.3485	Phillips House, Dinton
164		Plantation A (GB Clone 91)	0.0506	0.1577	0.0143	0.0512	0.0587	0.078	0.0917	0.0027	0.0641	0.0155	0.0903	0.0696	0.0905	0.0981	0.0241	0.1474	0.0654	0.0805	0.0218	0.0611	0.0783	-0.0012	-0.0299	0.0793	0.0794	0.0596	0.0858	0.0204	-0.0047	0.1647	0.0606	0.0334	0.2638	0.0505	0.0924	0.0029	0.2091	0.2379	Plantation A (GB Clone 91)
165		Pontypool Park (GB Clone 93)	0.0591	0.1589	0.1305	0.1677	0.1417	0.0785	0.1371	0.1421	0.0687	0.1028	0.1158	0.1452	0.2589	0.165	0.0661	0.1798	0.0379	0.1156	0.0599	0.1841	0.19	0.0231	0.082	-0.001	0.0657	0.0924	0.2134	0.0786	-0.0141	0.275	0.1255	0.0929	0.3052	0.1628	0.2125	-0.004	0.3016	0.1757	Pontypool Park (GB Clone 93)
166		Popes Hill	0.0518	0.1461	0.0586	0.139	0.109	0.1138	0.1148	0.1207	0.1104	0.0773	0.1213	0.1442	0.1617	0.1242	0.0809	0.1145	0.0657	0.1218	0.1163	0.0835	0.1164	0.0632	0.0446	0.1022	0.0802	0.063	0.0795	0.0542	0.0751	0.1443	0.0676	0.073	0.2017	0.0962	0.1602	0.0463	0.1869	0.2275	Popes Hill
167		Powderham A (GB Clone 94)	0.0652	0.1674	0.0567	0.1558	0.1036	0.1169	0.1463	0.1358	0.0677	0.0555	0.1075	0.1939	0.1441	0.1587	0.0535	0.1413	0.0866	0.0911	0.1072	0.0794	0.0576	0.0397	0.0348	0.1187	0.1114	0.0765	0.0805	0.085	0.103	0.1937	0.1189	0.0718	0.2273	0.1594	0.1788	0.045	0.1832	0.2597	Powderham A (GB Clone 94)
168		Preston Hall	0.0716	0.1706	0.1487	0.2321	0.1939	0.1328	0.1065	0.2024	0.1877	0.2115	0.158	0.2074	0.2343	0.1762	0.2039	0.1592	0.1299	0.1818	0.2088	0.0266	0.2226	0.1088	0.115	0.1	-0.0089	0.1377	0.202	0.0811	0.1344	0.0894	0.034	0.1479	0.3851	0.1637	0.2081	0.0969	0.2298	0.2095	Preston Hall
169		Priest Wood	0.0907	0.2267	0.1251	0.1192	0.1195	0.1069	0.1716	0.1167	0.0766	0.0795	0.1236	0.1349	0.1813	0.1689	0.0632	0.185	0.1034	0.1079	0.1016	0.1655	0.081	0.052	0.0878	0.0971	0.177	0.1425	0.2029	0.0862	0.0847	0.2887	0.1761	0.1312	0.3125	0.1829	0.209	0.0297	0.2905	0.3011	Priest Wood
170		Priors Wood, Stoke Edith	0.1373	0.2459	0.1501	0.0091	0.164	0.1229	0.0926	0.0624	0.0456	0.0763	0.1339	0.0275	0.1362	0.0065	0.1456	0.1854	0.0006	0.0926	0.189	0.1216	0.2397	0.0658	0.048	0.1444	0.1077	0.0406	0.2116	0.1081	0.0226	0.1528	-0.0184	-0.0142	0.2929	0.0234	0.0347	0.0751	0.191	0.2796	Priors Wood, Stoke Edith
171		Puttenage	0.1107	0.1847	0.0779	0.1582	0.0842	0.142	0.1313	0.1389	0.1029	0.078	0.0848	0.1611	0.1376	0.1502	0.0495	0.1843	0.0708	0.0844	0.0728	0.07	0.0787	0.0329	0.0247	0.0464	0.0963	0.0672	0.1608	0.0701	0.0402	0.1934	0.0807	0.0773	0.2406	0.1383	0.1494	0.042	0.1504	0.2261	Puttenage
172		quarry	0.0921	0.1887	0.0564	0.2217	0.1532	0.1166	0.1553	0.1919	0.0383	0.0883	0.0616	0.2508	0.1829	0.182	0.0945	0.1471	0.1123	0.1292	0.1665	0.1108	0.15	0.0459	0.0242	0.1723	0.1301	0.0925	0.1038	0.1039	0.1308	0.2224	0.1208	0.1202	0.2364	0.1093	0.1382	0.0848	0.1539	0.3423	quarry
173		Rapley Lake	-0.0095	0.1118	0.0306	0.049	0.0864	0.0858	0.0783	0.0349	0.0492	-0.0051	0.0965	0.0614	0.1384	0.0468	-0.0011	0.1577	0.0268	0.0953	0.0977	0.0553	0.1457	-0.0155	-0.0016	0.0733	0.0441	0.0092	0.1158	0.0229	0.0031	0.1825	-0.012	0.0122	0.3335	0.0861	0.0805	0.0156	0.1934	0.2602	Rapley Lake
174		RFDC	0.0637	0.2129	0.0923	0.1077	0.1088	0.1481	0.1661	0.0992	0.0849	0.0692	0.0903	0.1103	0.1876	0.1729	0.0249	0.2234	0.1036	0.1137	0.0905	0.0863	0.1482	-0.0242	0.0163	0.072	0.106	0.1257	0.1874	0.06	0.0344	0.2252	0.1147	0.1389	0.3443	0.1641	0.18	0.0326	0.2732	0.2943	RFDC
175		Rough Hill Wood (GB Clone 97)	-0.0202	0.1409	0.0138	0.1175	0.0535	0.0627	0.0496	0.0846	0.0046	0.0373	0.0585	0.1382	0.1073	0.0515	-0.0067	0.0942	-0.0192	0.0755	0.0488	-0.0253	0.0108	-0.0531	-0.0942	0.0736	0.0421	-0.0478	0.0197	-0.0099	0.0253	0.1815	0.0396	-0.0279	0.1459	0.0473	0.0925	-0.1041	-0.0052	0.2531	Rough Hill Wood (GB Clone 97)
176		Ruperra	0.0865	0.1656	0.0577	0.1506	0.1026	0.0902	0.116	0.1402	0.0498	0.0487	0.0762	0.1852	0.1319	0.1043	0.0573	0.1274	0.0308	0.0401	0.1094	0.0692	0.0492	0.0613	0.0096	0.0973	0.13	0.0569	0.143	0.0893	0.1144	0.216	0.095	0.0612	0.2097	0.135	0.1356	0.0473	0.0587	0.2725	Ruperra
177		Rydal Hall	0.0591	0.1075	0.0167	0.1794	0.1877	0.0811	0.1154	0.1421	0.1283	0.0625	0.129	0.1877	0.2473	0.1267	0.0311	0.1565	0.0415	0.1523	0.155	0.1071	0.1267	0.1018	-0.0016	0.1394	0.1209	0.0406	0.1335	0.1339	0.1073	0.1934	0.0759	0.0611	0.2512	0.1651	0.1973	-0.0194	0.0956	0.2407	Rydal Hall
178		Sandpit	0.1109	0.2314	0.1028	0.09	0.1272	0.1344	0.1371	0.0548	0.0834	0.106	0.1387	0.0661	0.1633	0.0887	0.0311	0.2278	0.0451	0.0467	0.1017	0.0653	0.1402	0.0449	0.0112	0.0812	0.1301	0.0869	0.1866	0.0375	0.0568	0.2626	0.0776	0.0838	0.2893	0.105	0.1288	0.0109	0.1215	0.2935	Sandpit
179		Scarles Grove (GB Clone 98)	0.0307	0.1379	0.1046	0.11	0.096	0.0597	0.1223	0.1283	0.0213	0.0479	0.1203	0.1441	0.1099	0.0381	0.128	0.1161	-0.0739	0.1335	0.154	0.1421	0.1647	0.1042	0.0589	0.1438	0.1167	-0.0083	0.1876	0.1117	0.1157	0.2075	0.0579	0.031	0.1476	0.0861	0.1177	0.001	0.1101	0.2229	Scarles Grove (GB Clone 98)
180		Scrub Wood 1 (GB Clone 99)	0.1094	0.1791	0.1172	0.1161	0.1244	0.1296	0.0801	0.1179	0.1114	0.1191	0.1447	0.1237	0.1554	0.0624	0.1311	0.1692	0.024	0.1082	0.145	0.13	0.1779	0.126	0.0288	0.1084	0.1206	0.0403	0.2078	0.0825	0.05	0.1897	0.0001	0.0479	0.2255	0.0496	0.0605	0.0592	0.0857	0.2115	Scrub Wood 1 (GB Clone 99)
181		Sculpture trail	0.1372	0.2062	0.1033	0.1831	0.1008	0.1338	0.1397	0.1502	0.1032	0.0965	0.091	0.2053	0.1626	0.176	0.0368	0.1822	0.0851	0.074	0.0881	0.0848	0.0996	0.0852	0.0497	0.0637	0.1141	0.0811	0.1752	0.0878	0.1123	0.248	0.1177	0.0988	0.2537	0.1701	0.18	0.0878	0.1132	0.2866	Sculpture trail
182		Sellings Wood (GB Clone 101)	0.092	0.1917	0.0737	0.1537	0.128	0.0296	0.1287	0.1168	-0.0084	0.0068	0.1077	0.1633	0.2114	0.1313	0.0045	0.1671	0.0006	0.076	0.0492	0.1907	0.1172	0.038	0.0774	0.0909	0.1571	0.1243	0.1445	0.1107	0.0672	0.2719	0.1337	0.1058	0.2759	0.1704	0.2069	0.0159	0.3009	0.2817	Sellings Wood (GB Clone 101)
183		Serridge	0.0452	0.1796	0.0695	0.1242	0.0627	0.1115	0.1245	0.0992	0.0685	0.0558	0.0742	0.1304	0.145	0.1492	0.0065	0.1577	0.0719	0.0719	0.0367	0.0395	0.0348	-0.0312	0.0037	0.0167	0.0848	0.0641	0.1312	0.0115	0.0297	0.2162	0.0984	0.0686	0.2727	0.1332	0.1658	-0.0199	0.1827	0.2505	Serridge
184		Seven Sisters, Penshurst	0.2351	0.3185	0.2526	0.3147	0.2567	0.2379	0.2911	0.3077	0.2566	0.2703	0.2846	0.3278	0.3447	0.3341	0.248	0.2513	0.2647	0.282	0.2348	0.2946	0.2944	0.2375	0.2193	0.2423	0.281	0.2659	0.2886	0.1932	0.1813	0.3872	0.2459	0.2485	0.4014	0.2521	0.2902	0.2122	0.3852	0.4045	Seven Sisters, Penshurst
185		Shepherds	0.1556	0.2725	0.147	0.1885	0.1574	0.209	0.2297	0.1483	0.1717	0.1716	0.2201	0.1943	0.195	0.1999	0.1244	0.2575	0.1917	0.1698	0.1168	0.163	0.1644	0.0741	0.0917	0.1544	0.1526	0.1536	0.1615	0.1073	0.1084	0.2851	0.1872	0.1442	0.3878	0.2264	0.2235	0.1209	0.3266	0.3182	Shepherds
186		Shorne Woods	0.0858	0.1478	0.0783	0.2125	0.1272	0.1479	0.1662	0.1756	0.1348	0.1216	0.1513	0.206	0.1942	0.1845	0.0988	0.1779	0.0486	0.2123	0.1116	0.0921	0.1596	0.0268	0.042	0.1277	0.0636	0.0776	0.0509	0.1102	0.0957	0.1849	0.0581	0.0911	0.2708	0.1673	0.196	0.0665	0.2576	0.2376	Shorne Woods
187		Silwood	0.0405	0.035	0.0733	0.2152	0.1953	0.0237	0.1209	0.1785	0.1506	0.1655	0.1665	0.2177	0.2204	0.1683	0.2126	0.1189	0.089	0.2098	0.178	0.1703	0.2448	0.1846	0.1481	0.1361	0.0802	0.1372	0.2352	0.1546	0.1229	0.1017	0.0724	0.1019	0.355	0.1912	0.2088	0.0794	0.2504	0.1757	Silwood
188		Skippet Wood A (GB Clone 102)	0.0669	0.2028	0.046	0.1444	0.132	0.0826	0.1347	0.1169	0.0226	0.0311	0.0815	0.1623	0.1598	0.1444	-0.0029	0.1413	0.0761	0.025	0.111	0.0305	0.0915	-0.0205	-0.0244	0.0967	0.1005	0.0814	0.0699	0.0318	0.0683	0.2165	0.0943	0.072	0.2686	0.1267	0.1872	0.0372	0.1543	0.3182	Skippet Wood A (GB Clone 102)
189		Sling	0.0111	0.1173	-0.0037	0.1005	0.057	0.0654	0.0623	0.0189	0.0456	-0.0092	0.0018	0.094	0.1633	0.148	-0.0918	0.1545	0.0556	0.0893	-0.0065	0.023	0.0446	-0.0752	-0.0714	-0.0309	-0.0522	0.0071	0.0458	0.0056	-0.0602	0.1181	0.0301	-0.0302	0.3204	0.1024	0.1288	-0.0686	0.2238	0.1831	Sling
190		Smithy Wood (GB Clone 105)	0.0536	0.2569	0.0817	0.1609	0.0849	0.0973	0.1011	0.1073	0.0697	0.0943	0.0958	0.1678	0.1155	0.1936	0.0317	0.1619	0.1186	0.0801	0.0223	-0.0005	0.0109	-0.1046	-0.0507	0.0624	0.0599	0.0763	0.0333	-0.0485	0.0283	0.2442	0.1184	0.0616	0.3713	0.1387	0.1827	0.0061	0.2076	0.3293	Smithy Wood (GB Clone 105)
191		Snipe Pond Shaw Wood (GB Clone 106)	0.1925	0.2314	0.2097	0.1588	0.2244	0.2318	0.1694	0.1697	0.2005	0.1655	0.2376	0.1417	0.2329	0.0847	0.2022	0.2824	0.1017	0.202	0.247	0.2488	0.3122	0.2146	0.2012	0.1682	0.1909	0.1119	0.3258	0.1949	0.0791	0.2736	0.0415	0.1441	0.4019	0.1673	0.1496	0.1607	0.311	0.3043	Snipe Pond Shaw Wood (GB Clone 106)
192		Soigne chestnut (GB Clone 107)	0.1631	0.2174	0.1858	0.2321	0.125	0.1618	0.2224	0.2187	0.1192	0.1909	0.2016	0.2362	0.1788	0.1456	0.2178	0.1825	0.0198	0.2212	0.1791	0.2463	0.2853	0.1725	0.1772	0.2086	0.1932	0.1426	0.2895	0.2246	0.2036	0.2854	0.1748	0.1802	0.1672	0.1659	0.1967	0.1171	0.2526	0.3038	Soigne chestnut (GB Clone 107)
193		Speech House	0.1139	0.2332	0.1249	0.1974	0.1014	0.1502	0.1179	0.1635	0.1506	0.1479	0.1403	0.1954	0.131	0.1859	0.1269	0.163	0.1418	0.1289	0.0921	0.0283	0.145	0.0372	0.0659	0.0652	0.0891	0.121	0.1696	0.0348	0.067	0.2051	0.1022	0.1355	0.3177	0.1343	0.1943	0.0769	0.2343	0.2921	Speech House
194		St Pierre	0.0448	0.1382	0.0264	0.113	0.0783	0.0873	0.1318	0.109	0.0455	0.034	0.0744	0.1423	0.1105	0.133	-0.0069	0.1304	0.0654	0.0609	0.0734	0.0324	0.0382	-0.004	-0.0014	0.0905	0.0958	0.0646	0.0686	0.0542	0.0705	0.197	0.0909	0.0572	0.2363	0.1402	0.1416	0.019	0.1327	0.2565	St Pierre
195		Staple Edge	0.1135	0.2278	0.0828	0.1451	0.0748	0.1499	0.1164	0.1203	0.1038	0.0984	0.1296	0.1627	0.1183	0.1896	0.0502	0.1851	0.1149	0.0867	0.0352	0.0596	0.063	-0.029	0.0158	0.0729	0.1045	0.1007	0.1206	0.0532	0.0371	0.2424	0.1283	0.0969	0.3073	0.1494	0.1793	0.0621	0.2309	0.2915	Staple Edge
196		Steam Mills	0.0499	0.1887	0.0656	0.1208	0.0934	0.111	0.1098	0.1058	0.0687	0.066	0.0951	0.0742	0.1942	0.1549	-0.0853	0.1545	0.0556	0.0993	0.0099	0.0844	0.0949	-0.0575	0.0049	0.0012	0.0678	0.0795	0.0534	-0.0594	-0.026	0.2318	0.0396	0.0911	0.3104	0.0866	0.1624	-0.0247	0.2198	0.2739	Steam Mills
197		Stopham Estate A (GB Clone 110)	0.0845	0.1524	0.0977	0.1947	0.171	0.1336	0.1899	0.1843	0.1488	0.1007	0.1562	0.217	0.2226	0.1863	0.0555	0.189	0.1131	0.1526	0.1662	0.1754	0.0963	0.1522	0.075	0.1523	0.1819	0.1022	0.157	0.0856	0.1285	0.2723	0.0987	0.1309	0.3107	0.1924	0.209	0.0623	0.1648	0.2547	Stopham Estate A (GB Clone 110)
198		Stour Wood	0.0695	0.1853	0.0737	0.1596	0.1069	0.0471	0.0933	0.1333	0.0504	0.0693	0.0814	0.1884	0.1614	0.1368	0.0492	0.0649	0.0521	0.0559	0.0959	0.0919	0.0337	0.0448	0.0293	0.0905	0.1316	0.0838	0.1125	0.0528	0.094	0.2395	0.1246	0.0736	0.2557	0.1339	0.1698	0.0062	0.1522	0.2817	Stour Wood
199		Stretton Hall A (GB Clone 112)	0.0009	0.1762	-0.0037	0.057	0.043	0.0119	0.0581	0.002	-0.0308	-0.0133	0.0527	0.0619	0.1006	0.06	-0.0415	0.1275	-0.0112	0	-0.0279	0.0086	0.0487	-0.1321	-0.0865	0.0101	0.0196	0.0366	0.0458	-0.0021	-0.02	0.1798	0.0794	0.0144	0.2492	0.0839	0.1304	-0.098	0.1953	0.2439	Stretton Hall A (GB Clone 112)
200		Sunninghill	0.1094	0.1512	0.0501	0.1646	0.1152	0.1085	0.126	0.1302	0.0747	0.0277	0.0589	0.1906	0.1281	0.1087	0.0651	0.1446	0.0506	0.078	0.1406	0.076	0.1247	0.0915	0.0346	0.1189	0.1126	0.0386	0.1481	0.1156	0.101	0.1451	0.0593	0.0577	0.1933	0.1125	0.1252	0.0798	0.1014	0.2627	Sunninghill
201		Swanton Valley (GB Clone 114)	0.0526	0.1069	0.0469	0.1329	0.1084	0.0148	0.0823	0.0981	0.053	0.0221	0.0349	0.1158	0.1652	0.1221	-0.0236	0.0937	0.0268	0.0537	0.1076	0.0385	0.0978	0.0411	-0.0489	0.0144	0.0737	0.0092	0.1669	0.0205	0.0411	0.231	0.03	0.0372	0.2806	0.1018	0.1177	0.0252	0.0673	0.2804	Swanton Valley (GB Clone 114)
202		Swillow Wood, Stoke Edith	0.0245	0.1855	0.0581	0.1537	0.0677	0.0522	0.0583	0.096	0.0729	0.063	0.07	0.1666	0.118	0.1629	0.0045	0.0993	0.0489	0.1131	0.03	0.0405	-0.0117	-0.0803	-0.0501	0.07	0.1063	0.0489	0.0709	-0.0047	0.0032	0.2579	0.105	0.0496	0.3381	0.1283	0.1726	-0.0466	0.1753	0.2956	Swillow Wood, Stoke Edith
203		Tapeley Park A (GB Clone 115)	0.1084	0.2322	0.0975	0.186	0.1874	0.1843	0.2269	0.1779	0.1276	0.1248	0.185	0.2056	0.2418	0.2247	0.0818	0.2417	0.1707	0.1644	0.1666	0.1451	0.1386	0.0355	0.0368	0.1796	0.1078	0.1671	0.1278	0.1237	0.1223	0.2584	0.159	0.1508	0.3826	0.2363	0.2332	0.0926	0.3228	0.3109	Tapeley Park A (GB Clone 115)
204		The Hangings	0.0696	0.1412	0.0397	0.1546	0.1069	0.0936	0.1251	0.1228	0.0973	0.0439	0.1071	0.1815	0.15	0.1458	0.0413	0.1355	0.064	0.1224	0.0825	0.0717	0.0126	0.0507	0.0101	0.1138	0.1417	0.0543	0.0795	0.0755	0.0825	0.2224	0.1045	0.0478	0.2764	0.1543	0.1676	0.0284	0.1685	0.271	The Hangings
205		The Weir	0.168	0.2074	0.127	0.2394	0.1456	0.1464	0.1626	0.2118	0.1196	0.1448	0.1178	0.2769	0.1713	0.1671	0.1365	0.1543	0.0725	0.1136	0.1932	0.1336	0.1382	0.1731	0.0781	0.1796	0.178	0.0823	0.2203	0.1719	0.1966	0.2696	0.1527	0.1067	0.2034	0.1709	0.1748	0.121	0.0017	0.3127	The Weir
206		Thick Thorn Wood A (GB Clone 117)	0.0587	0.0656	0.0287	0.2427	0.1802	0.0553	0.0961	0.2024	0.1257	0.0811	0.1105	0.2772	0.2175	0.1894	0.1214	0.0867	0.1103	0.1651	0.1816	0.1171	0.1509	0.1491	0.1177	0.1624	0.0536	0.0914	0.1	0.1596	0.1683	0.1033	0.0966	0.06	0.3026	0.2051	0.2151	0.0975	0.1918	0.2008	Thick Thorn Wood A (GB Clone 117)
207		Thorrington A (GB Clone 119)	0.0832	0.1862	0.0856	0.1199	0.0931	0.1054	0.0956	0.1051	0.0806	0.0929	0.1094	0.1333	0.1263	0.0683	0.0638	0.1171	0.0322	0.0856	0.1277	0.0472	0.0894	0.0653	0.0156	0.1014	0.1106	0.0254	0.1114	0.003	0.066	0.2211	0.0202	0.0384	0.1723	0.03	0.0858	0.0341	0.0476	0.2692	Thorrington A (GB Clone 119)
208		Three Sisters, Bachymbyd	0.1947	0.2369	0.2171	0.1851	0.2003	0.2057	0.1694	0.1843	0.2141	0.1514	0.2326	0.1783	0.1915	0.1267	0.2294	0.2691	0.0825	0.2599	0.2127	0.2894	0.2926	0.2402	0.2094	0.1834	0.2063	0.1031	0.3116	0.1949	0.0887	0.2131	0.0396	0.1193	0.3695	0.1805	0.1638	0.1464	0.332	0.2501	Three Sisters, Bachymbyd
209		Thrift Wood (GB Clone 121)	0.0375	0.247	0.122	0.1315	0.0777	0.1509	0.1651	0.1202	0.1292	0.1035	0.0972	0.1463	0.1555	0.2106	0.0619	0.2271	0.1239	0.1649	0.0339	0.072	0.0768	-0.0623	-0.0083	0.0542	0.0764	0.1017	0.0852	-0.0315	0.0172	0.1992	0.0831	0.0987	0.3891	0.177	0.1835	0.011	0.281	0.2489	Thrift Wood (GB Clone 121)
210		Timberline A (GB Clone 122)	0.0765	0.1643	0.0248	0.1956	0.1254	0.115	0.121	0.1483	0.0758	0.0718	0.0772	0.22	0.1578	0.1707	0.0308	0.1471	0.1087	0.095	0.1265	0.0271	0.1015	0.0146	-0.013	0.1286	0.063	0.0547	0.0409	0.0762	0.1096	0.1954	0.095	0.0612	0.2633	0.1372	0.1475	0.0704	0.1089	0.3023	Timberline A (GB Clone 122)
211		Tolt (GB Clone 124)	0.0176	0.1493	-0.0097	0.0173	0.0531	0.0461	0.0298	-0.0198	0.0003	-0.0468	0.0186	0.0184	0.0392	0.0111	0.0204	0.1517	-0.0312	0.0352	-0.0023	-0.0593	0.068	-0.0614	-0.1246	0.0251	-0.0016	-0.0381	0.0702	0.0156	-0.0662	0.0367	-0.029	-0.0864	0.2751	0.0412	0.0327	-0.0794	0.1538	0.2062	Tolt (GB Clone 124)
212		Tortworth Chestnut	0.1791	0.2436	0.1582	0.234	0.2013	0.167	0.2116	0.2034	0.1783	0.148	0.1929	0.2624	0.2625	0.225	0.1867	0.2267	0.1559	0.2148	0.1855	0.225	0.1934	0.1776	0.1479	0.1981	0.2262	0.1834	0.2723	0.2174	0.1551	0.2646	0.2092	0.1796	0.3157	0.2392	0.2611	0.1026	0.3423	0.2896	Tortworth Chestnut
213		Tregothnan (GB Clone 125)	0.0276	0.1846	0.0308	0.1402	0.1152	0.1344	0.1022	0.116	0.0496	0.059	0.0826	0.1092	0.1748	0.1004	-0.0296	0.1873	0.027	-0.0166	0.0916	-0.0492	0.0986	-0.0575	-0.064	0.0079	0.0219	0.0325	0.0986	-0.0152	0.0253	0.1934	0.0044	0.0669	0.2746	0.0919	0.1423	-0.0194	0.0508	0.2824	Tregothnan (GB Clone 125)
214		Trelowarren A (GB Clone 126)	0.0269	0.1189	0.029	0.1295	0.0855	0.0171	0.0498	0.1048	-0.051	-0.0187	0.0382	0.1614	0.1317	0.0797	0.0314	0.0767	0.001	0.0006	0.0944	0.0702	0.0749	0.0051	0.0209	0.0782	0.0098	0.0449	0.1125	0.074	0.0471	0.144	0.0576	-0.0078	0.2687	0.1128	0.1233	0.0314	0.1903	0.2011	Trelowarren A (GB Clone 126)
215		Trew Wood A (SC 305-01) (GB Clone 128)	0.0886	0.2333	0.0758	0.1241	0.087	0.0837	-0.0096	0.0699	0.087	0.0963	0.0698	0.0742	0.1515	0.0847	0.0259	0.1232	0.027	0.0355	0.0671	-0.0939	0.1369	-0.0575	-0.11	-0.0032	0.0196	0.0242	0.1356	-0.0681	-0.0171	0.1867	-0.0163	0.0353	0.1785	-0.0858	0.099	0.006	0.0078	0.2824	Trew Wood A (SC 305-01) (GB Clone 128)
216		Turnips Grove	0.0631	0.1612	0.0582	0.146	0.075	0.0956	0.1295	0.129	0.0478	0.0648	0.0954	0.1919	0.0955	0.1341	0.0512	0.1058	0.0673	0.0681	0.1056	0.0546	0.0342	0.0346	0.0104	0.1255	0.1108	0.0623	0.0603	0.0498	0.0933	0.2228	0.0934	0.0559	0.2298	0.1225	0.1313	0.0489	0.1164	0.2717	Turnips Grove
217		Twenty Acre Wood A (GB Clone 130)	0.0884	0.2215	0.1003	0.1334	0.1066	0.154	0.1512	0.1224	0.1107	0.1194	0.1364	0.0982	0.1947	0.1617	0.0401	0.1853	0.0821	0.1256	0.0377	0.0975	0.096	-0.014	0.013	0.0156	0.0748	0.0938	0.1351	0.0256	0.0179	0.215	0.1021	0.0965	0.2884	0.1413	0.1761	-0.0278	0.239	0.2583	Twenty Acre Wood A (GB Clone 130)
218		Upper Glen	0.0456	0.136	0.0549	0.0781	0.0713	0.0934	0.0969	0.0791	0.0551	0.0458	0.0962	0.1059	0.1219	0.1148	0.0216	0.1343	0.0667	0.0697	0.0789	0.0836	0.09	0.0097	0.0535	0.0812	0.0674	0.0857	0.104	0.0581	0.0364	0.1793	0.0745	0.0574	0.2804	0.1366	0.1272	0.04	0.2195	0.2005	Upper Glen
219		Waldershare	-0.0382	0.1447	0.0194	0.0604	0.0832	0.065	0.0557	0.0428	0.0492	0.0479	0.0639	0.0317	0.1384	0.0553	-0.0236	0.1416	-0.0312	0.0389	0.041	-0.035	-0.007	-0.04	-0.1246	-0.0214	0.0172	-0.0381	0.082	-0.0649	-0.0025	0.1522	0.0024	-0.0301	0.2165	0.0585	0.1208	-0.147	-0.0117	0.2028	Waldershare
220		Walks Copse (GB Clone 132)	0.072	0.2317	0.0867	0.1453	0.1605	0.1604	0.1607	0.1344	0.0847	0.1138	0.1461	0.1439	0.2406	0.1538	-0.0068	0.2212	0.0967	0.1268	0.1197	0.0337	0.0412	-0.0282	-0.0221	0.113	0.1163	0.111	0.0809	0.0498	0.0823	0.2995	0.1248	0.0863	0.3397	0.1576	0.1746	-0.036	0.1725	0.344	Walks Copse (GB Clone 132)
221		Wardwell Wood, Newington	0.1144	0.1836	0.1059	0.2041	0.1149	0.1401	0.1463	0.1905	0.0192	0.0827	0.1092	0.2391	0.1554	0.1414	0.1045	0.1513	0.0591	0.115	0.1798	0.1485	0.1619	0.1218	0.0759	0.1776	0.1428	0.0618	0.173	0.1388	0.1452	0.2375	0.1031	0.0911	0.1688	0.1078	0.1174	0.1117	0.157	0.2994	Wardwell Wood, Newington
222		Warley Place	0.054	0.1678	0.0475	0.1445	0.0707	0.0677	0.0878	0.1109	0.0489	0.0653	0.0463	0.1637	0.1084	0.1302	0.0302	0.0775	0.0436	0.0484	0.0687	0.0302	0.0459	-0.0136	-0.0379	0.0564	0.0867	0.0356	0.0845	0.0055	0.0315	0.203	0.0765	0.0645	0.193	0.0731	0.1386	-0.0101	0.0793	0.2663	Warley Place
223		Warren Grove	0.1055	0.1804	0.0525	0.1527	0.0934	0.0988	0.0163	0.0882	0.0573	0.0625	0.1021	0.1621	0.1331	-0.0079	0.071	0.136	-0.0356	0.0355	0.1181	0.0637	0.1335	0.0955	0.0299	0.0942	0.0922	-0.0196	0.1957	0.102	0.0743	0.2318	0.0301	-0.0517	0.222	0.0415	0.0384	0.0348	-0.0186	0.2592	Warren Grove
224		Warren Plantation A (GB Clone 133)	0.151	0.1978	0.1185	0.2732	0.225	0.1255	0.1536	0.2289	0.237	0.2206	0.182	0.2802	0.2598	0.1923	0.2307	0.124	0.1593	0.2099	0.2471	0.1319	0.2588	0.2025	0.1509	0.1629	0.1202	0.1341	0.2315	0.162	0.1847	0.1562	0.0757	0.1488	0.2346	0.1588	0.2244	0.1398	0.1577	0.2534	Warren Plantation A (GB Clone 133)
225		Weasenham A (GB Clone 135)	0.0506	0.1433	0.0338	0.1133	0.1086	0.1114	0.1263	0.1085	0.0528	0.0469	0.0859	0.128	0.1737	0.1332	0.0029	0.1514	0.0412	0.1102	0.1038	0.0302	0.0651	-0.0455	-0.0299	0.0978	0.0702	0.0576	0.0682	0.0671	0.0418	0.1855	0.0633	0.064	0.2343	0.1283	0.1534	0.0103	0.1991	0.2379	Weasenham A (GB Clone 135)
226		Welbeck (GB Clone 137)	0.0839	0.2463	0.0663	0.164	0.0363	0.1048	0.0479	0.1003	0.0543	0.0669	0.0492	0.1474	0.1318	0.1572	-0.0126	0.1559	0.0836	0.0512	-0.0195	-0.0354	0.0774	-0.1604	-0.0291	0.008	0.0056	0.0801	0.0809	0.0005	0.0173	0.2427	0.1054	0.0437	0.3444	0.1113	0.1328	0.0402	0.22	0.3059	Welbeck (GB Clone 137)
227		Wellhouse Wood	0.0405	0.2008	0.1282	0.0936	0.0934	0.0464	0.0539	0.081	0.0611	0.0554	0.0808	0.1203	0.1331	0.0725	0.0757	0.1296	-0.0033	0.1059	0.0848	0.1426	0.1022	0.052	0.042	0.0678	0.1319	0.0136	0.1903	0.0304	0.0334	0.2349	0.0724	0.0332	0.307	0.1126	0.1364	-0.0299	0.191	0.2376	Wellhouse Wood
228		Welshbury	0.1069	0.1748	0.0855	0.21	0.1359	0.1289	0.1646	0.1788	0.1035	0.1172	0.139	0.2457	0.174	0.1715	0.1234	0.113	0.1095	0.1423	0.1656	0.0944	0.1226	0.1085	0.073	0.1717	0.1299	0.091	0.0971	0.119	0.1538	0.1956	0.1243	0.0946	0.1406	0.1267	0.1761	0.0849	0.1382	0.2738	Welshbury
229		Wentwood	0.0931	0.2866	0.1092	0.2272	0.1297	0.1948	0.1298	0.1792	0.0927	0.1543	0.1545	0.2134	0.2193	0.2256	0.0478	0.2222	0.1255	0.0912	0.0936	0.0233	0.0971	-0.1006	-0.0665	0.0971	-0.0396	0.1079	0.0334	0.0209	0.0729	0.2697	0.1438	0.0773	0.403	0.1854	0.2132	0.0727	0.2647	0.3135	Wentwood
230		West Prawle Wood A (GB Clone 138)	0.0406	0.1473	0.0606	0.109	0.0898	0.0615	0.0993	0.1153	0.0129	0.045	0.0781	0.1394	0.1493	0.1114	0.0059	0.086	0.0365	0.0588	0.1109	0.0538	0.0361	0.0428	-0.0027	0.1087	0.1303	0.0472	0.1161	0.0626	0.0975	0.2436	0.1042	0.0574	0.187	0.1101	0.1259	-0.0032	0.0982	0.2742	West Prawle Wood A (GB Clone 138)
231		West Wood	0.1204	0.2587	0.0966	0.167	0.1258	0.1073	0.1691	0.1176	0.0301	0.0453	0.0941	0.1678	0.1253	0.203	0.037	0.1945	0.1062	0.0436	0.0608	0.0896	0.1587	-0.0282	0.018	0.0443	0.1182	0.1092	0.1452	0.0107	0.0061	0.2472	0.1136	0.0991	0.3475	0.119	0.2125	0.0355	0.2549	0.3558	West Wood
232		Weston Common (GB Clone 141)	0.0405	0.1148	0.0224	0.057	0.1272	0.0654	0.1003	0.0988	0.0337	-0.0092	0.0753	0.0493	0.2127	0.1267	-0.1052	0.1644	0.0196	0.1091	0.0707	0.1493	0.0762	0.0118	-0.0148	0.0831	0.1039	0.0701	0.1499	0.0999	0.0199	0.2334	0.1079	0.0893	0.335	0.1718	0.1934	0.001	0.2683	0.2531	Weston Common (GB Clone 141)
233		Whitecroft	0.0439	0.247	0.0985	0.138	0.1004	0.1682	0.1251	0.1065	0.084	0.1099	0.1179	0.1063	0.176	0.1595	0.0208	0.2169	0.0831	0.0795	0.0529	-0.0556	0.1066	-0.1538	-0.0501	0.0188	0.0356	0.0927	0.0991	-0.0206	0.0032	0.2477	0.0917	0.1005	0.3668	0.138	0.1795	-0.0249	0.2337	0.3038	Whitecroft
234		Whorley Pin Plantation A (GB Clone 142)	0.0866	0.2422	0.1399	0.1425	0.1143	0.1276	0.184	0.154	0.1132	0.1271	0.1607	0.1629	0.1674	0.2203	0.0858	0.2146	0.1343	0.1457	0.0461	0.1494	0.0807	0.0223	0.0777	0.0833	0.1512	0.1403	0.1367	0.0416	0.071	0.2829	0.1636	0.1281	0.3532	0.2148	0.2218	0.0406	0.3065	0.2843	Whorley Pin Plantation A (GB Clone 142)
235		Wickhill Hanger (GB Clone 144)	0.0144	0.1762	0.0656	0.1241	0.0358	0.0913	0.0685	0.0988	-0.0689	0.0028	0.0623	0.1203	0.1575	0.141	-0.0661	0.1644	0.0159	-0.0208	0.0059	0.0859	0.0986	-0.0982	-0.0016	-0.0032	0.0332	0.0701	0.112	0.0106	-0.0413	0.2583	0.0635	0.0332	0.3459	0.1177	0.1181	-0.0194	0.254	0.2376	Wickhill Hanger (GB Clone 144)
236		Wilderness Wood 1 (GB Clone 145)	0.0825	0.2092	0.0899	0.0991	0.0778	0.1262	0.1009	0.1044	0.0724	0.097	0.1433	0.1222	0.1368	0.1452	0.0377	0.1737	0.0861	0.1014	0.0581	0.0565	0.0717	-0.0069	0.007	0.1045	0.0737	0.0799	0.0639	0.0446	0.0382	0.2328	0.0872	0.0305	0.3317	0.1504	0.1198	0.0577	0.242	0.2479	Wilderness Wood 1 (GB Clone 145)
237		Wimberry Slade	0.0999	0.1719	0.0758	0.1963	0.1417	0.1086	0.0277	0.1453	0.0977	0.0831	0.1141	0.1939	0.2204	0.141	0.0757	0.1798	0.0083	0.1026	0.1017	0.113	0.1164	0.0986	-0.0216	0.1033	0.0902	0.0304	0.1791	0.1202	0.0387	0.2001	0.0776	0.0144	0.2532	0.1024	0.1582	-0.0247	0.1113	0.1794	Wimberry Slade
238		Windmill Plantation (GB Clone 147)	-0.0274	0.0766	0.0224	0.1434	0.1212	0.0785	0.0787	0.1058	0.0942	0.106	0.109	0.124	0.186	0.1004	0.0851	0.1296	0.0121	0.1251	0.0671	-0.0391	0.15	-0.0843	-0.0082	0.023	-0.0907	0.0566	0.0483	0.0328	0.0439	0.0417	0.0024	0.0454	0.2929	0.1202	0.1582	-0.0194	0.1736	0.1794	Windmill Plantation (GB Clone 147)
239		Windsor - Buttersteep	-0.0131	0.1741	0.0109	0.0297	0.0772	0.0785	0.0867	-0.0336	0.0377	0.0336	0.0916	0.0275	0.1393	0.1193	-0.0475	0.1779	0.0196	0.0649	0.0059	0.005	0.0487	-0.0889	-0.1263	0.0398	0.0196	0.0136	0.0433	-0.0313	-0.0382	0.1798	0.0776	0.0079	0.3237	0.1126	0.1596	-0.092	0.2036	0.247	Windsor - Buttersteep
240		Woodbury Hill (GB Clone 148)	0.0177	0.1762	0.0656	0.1175	0.057	0.1061	0.1371	0.0882	0.087	0.0625	0.1124	0.152	0.1575	0.1845	0.0363	0.1928	0.0825	0.1494	0.014	0.0621	0.0646	-0.0156	-0.0567	0.0697	0.0822	0.0776	0.0871	0.0423	0.0199	0.2163	0.0897	0.0514	0.3594	0.1673	0.1596	-0.0091	0.2647	0.2376	Woodbury Hill (GB Clone 148)
241		Worrall Hill	0.1774	0.2416	0.1917	0.115	0.1939	0.1766	0.1233	0.1065	0.1548	0.1465	0.2029	0.1176	0.2166	0.0387	0.1745	0.2321	0.0309	0.1927	0.1983	0.2132	0.2759	0.1643	0.1543	0.1657	0.2025	0.0909	0.318	0.1973	0.1257	0.2827	0.1017	0.1023	0.3397	0.1404	0.1154	0.0843	0.2219	0.332	Worrall Hill
242		Writtlepark Wood	0.1407	0.2592	0.14	0.1598	0.0973	0.1745	0.1701	0.11	0.1124	0.1162	0.1424	0.1393	0.1955	0.1762	0.0812	0.2485	0.1239	0.1413	0.064	0.0893	0.1445	0.0417	0.0241	0.0719	0.136	0.136	0.2245	0.0789	0.0255	0.2649	0.1164	0.0987	0.3754	0.1208	0.0586	0.0208	0.3009	0.2641	Writtlepark Wood
243		Wyatt Wood (GB Clone 149)	0.1082	0.2405	0.1501	0.1588	0.1091	0.1182	0.1209	0.1325	0.1115	0.1599	0.1191	0.124	0.1575	0.1515	0.1077	0.1011	0.0625	0.1464	0.1149	0.1115	0.193	0.0759	0.036	0.0905	0.1134	0.072	0.1696	-0.0125	0.028	0.2409	0.0599	0.0983	0.2431	0.0014	0.1567	0.0254	0.16	0.2935	Wyatt Wood (GB Clone 149)
244		Wymondley Bury	0.1925	0.2581	0.226	0.2332	0.1474	0.1501	0.2024	0.2303	0.0977	0.1898	0.1783	0.2374	0.2101	0.1683	0.2228	0.1928	0.0451	0.2148	0.1835	0.2467	0.2948	0.2097	0.1481	0.1509	0.1893	0.0942	0.3246	0.1813	0.1316	0.2303	0.1079	0.1441	0.0435	0.0866	0.168	0.0794	0.2238	0.2501	Wymondley Bury
245		Wytham Wood (GB Clone 150)	0.1622	0.2615	0.1393	0.1465	0.0706	0.1367	0.1173	0.0988	0.0173	0.0963	0.0623	0.0979	0.1662	0.0847	0.0363	0.2295	-0.0112	-0.0251	0.0413	0.0702	0.2073	-0.0116	0.0049	-0.0781	0.0008	0.0663	0.2883	0.063	0.0032	0.2099	0.0617	0.0838	0.211	0.0839	0.1243	0.0395	0.1736	0.2279	Wytham Wood (GB Clone 150)
			PT01	PT02	PT03	SP01	SP02	SP03	SP04	SP05	SP06	SP07	SP08	SP09	SP10	SP11	SP12	SP13	SP14	SP15	SP16	SP17	FR01	FR02	FR03	IT01	IT02	IT03	IT04	IT05	IT06	IT07	IT08	IT09	SK02	SK03	HU01	RO01	RO02	RO03
Fst	using	ENA	top and bottom 10%		median
6 SSR		PT01	PT01	PT02	PT03	SP01	SP02	SP03	SP04	SP05	SP06	SP07	SP08	SP09	SP10	SP11	SP12	SP13	SP14	SP15	SP16	SP17	FR01	FR02	FR03	IT01	IT02	IT03	IT04	IT05	IT06	IT07	IT08	IT09	SK02	SK03	HU01	RO01	RO02	RO03	ENGLAND	IRELAND	WALES
41 pops		PT02	0.071273
		PT03	0.043814	0.071276
		SP01	0.160987	0.232227	0.179234
		SP02	0.136154	0.209966	0.131433	0.148417
		SP03	0.096258	0.124013	0.092321	0.190535	0.170084
		SP04	0.148673	0.195021	0.135844	0.186047	0.15806	0.097594
		SP05	0.145768	0.205302	0.137455	0.028052	0.107933	0.163538	0.171331
		SP06	0.127478	0.20145	0.111217	0.165716	0.096679	0.10846	0.147051	0.149028
		SP07	0.094612	0.142252	0.058398	0.144031	0.112357	0.09813	0.148545	0.109645	0.071567
		SP08	0.135465	0.169983	0.100208	0.20207	0.147846	0.043293	0.10541	0.171522	0.109686	0.098014
		SP09	0.188147	0.257202	0.205805	-0.007257	0.167075	0.228202	0.200582	0.052213	0.207916	0.179065	0.227036
		SP10	0.186284	0.244878	0.159853	0.191544	0.047649	0.187095	0.192092	0.151584	0.130366	0.133661	0.166447	0.215326
		SP11	0.15116	0.175785	0.143557	0.126882	0.134631	0.166459	0.151811	0.110452	0.131636	0.12174	0.175368	0.135931	0.169729
		SP12	0.106771	0.184766	0.082326	0.107018	0.108921	0.147952	0.158459	0.098703	0.103676	0.058462	0.13435	0.131179	0.186235	0.154559
		SP13	0.117584	0.136477	0.112961	0.235763	0.173402	0.048218	0.122975	0.20044	0.152778	0.152933	0.107485	0.265251	0.201226	0.191776	0.179262
		SP14	0.12951	0.183818	0.121499	0.12507	0.092324	0.118444	0.129716	0.108711	0.053781	0.076046	0.128695	0.142703	0.137025	0.063152	0.105875	0.142966
		SP15	0.148029	0.235898	0.129749	0.166917	0.101171	0.144116	0.153673	0.142088	0.020739	0.10446	0.140672	0.19412	0.130168	0.138325	0.101429	0.181074	0.073941
		SP16	0.138431	0.229841	0.122283	0.168691	0.016299	0.175289	0.162491	0.119222	0.115901	0.111389	0.156715	0.176113	0.10243	0.178042	0.090341	0.202327	0.11131	0.106092
		SP17	0.122029	0.199811	0.094556	0.205943	0.146233	0.156914	0.154048	0.159335	0.159069	0.133474	0.137084	0.217491	0.178212	0.172195	0.121493	0.154249	0.147426	0.13959	0.144589
		FR01	0.109266	0.212907	0.102109	0.218929	0.141471	0.151949	0.181997	0.180284	0.136491	0.113154	0.156069	0.250188	0.186744	0.207498	0.093983	0.159377	0.143299	0.138118	0.124363	0.118381
		FR02	0.094408	0.210202	0.092289	0.153363	0.084591	0.138802	0.120939	0.129138	0.094912	0.103024	0.113039	0.164971	0.143663	0.14927	0.062091	0.153476	0.108263	0.089131	0.066945	0.058351	0.097223
		FR03	0.088359	0.180478	0.056835	0.156269	0.106757	0.110584	0.1258	0.119538	0.085435	0.089828	0.097853	0.184135	0.148693	0.146154	0.075251	0.124506	0.098049	0.085699	0.105196	0.037259	0.067002	0.037861
		IT01	0.136408	0.205409	0.138895	0.185327	0.092083	0.165181	0.162933	0.15176	0.137535	0.134964	0.142573	0.16004	0.147505	0.154967	0.118321	0.178063	0.113399	0.106209	0.065159	0.128431	0.147775	0.079777	0.111588
		IT02	0.116021	0.168652	0.110275	0.209044	0.129025	0.159905	0.145216	0.176682	0.138518	0.163527	0.147617	0.20715	0.171484	0.169724	0.155835	0.161301	0.143614	0.130145	0.135709	0.1144	0.180577	0.091374	0.092624	0.079643
		IT03	0.113248	0.15515	0.089696	0.161474	0.107025	0.10632	0.107818	0.120787	0.101206	0.08877	0.090712	0.171939	0.117943	0.112942	0.114766	0.109844	0.080016	0.111127	0.117737	0.118086	0.116279	0.101667	0.065787	0.093098	0.088851
		IT04	0.119475	0.205692	0.102927	0.25671	0.193492	0.159261	0.1923	0.212394	0.191322	0.157717	0.16596	0.291725	0.219411	0.244926	0.155663	0.161344	0.201218	0.203044	0.186861	0.137769	0.112339	0.121582	0.103759	0.208021	0.155474	0.136321
		IT05	0.075269	0.197703	0.107651	0.161501	0.105599	0.133148	0.148899	0.134421	0.135626	0.126689	0.13213	0.162223	0.138795	0.1635	0.107252	0.132008	0.129488	0.119323	0.097533	0.087327	0.096294	0.058125	0.05502	0.070617	0.100355	0.082944	0.112508
		IT06	0.113667	0.179529	0.110545	0.128196	0.083938	0.127228	0.09453	0.100535	0.117384	0.108142	0.105493	0.122886	0.107043	0.121799	0.100165	0.163483	0.113394	0.106042	0.078143	0.120526	0.150843	0.060193	0.068357	0.064214	0.088404	0.071631	0.168208	0.062822
		IT07	0.160163	0.159523	0.134955	0.241583	0.219487	0.152274	0.190557	0.211698	0.236584	0.185341	0.137858	0.250553	0.21608	0.214539	0.247841	0.185591	0.20672	0.247078	0.229093	0.174495	0.269724	0.199753	0.172069	0.18614	0.116567	0.147867	0.209277	0.181775	0.142316
		IT08	0.118308	0.140617	0.09934	0.159618	0.142794	0.101673	0.094917	0.141217	0.145635	0.123123	0.093045	0.165329	0.156852	0.124509	0.145771	0.120499	0.117423	0.147794	0.161854	0.117986	0.180777	0.110235	0.086824	0.11853	0.095743	0.078957	0.147025	0.086243	0.05249	0.080712
		IT09	0.127244	0.174959	0.095063	0.166306	0.115626	0.114246	0.111235	0.124909	0.08041	0.097724	0.12065	0.188238	0.130555	0.128397	0.127345	0.12009	0.095757	0.092246	0.123103	0.122041	0.114143	0.105124	0.062442	0.112941	0.087382	0.036227	0.134214	0.098492	0.077974	0.163651	0.086481
		SK02	0.289029	0.314357	0.240569	0.319717	0.229444	0.235752	0.258742	0.296625	0.202733	0.234537	0.229613	0.336158	0.26437	0.22757	0.27444	0.227975	0.159038	0.248048	0.260546	0.249478	0.294908	0.248382	0.225096	0.231236	0.260863	0.165011	0.314255	0.246239	0.244948	0.29577	0.216039	0.219905
		SK03	0.176819	0.220261	0.143526	0.195283	0.136474	0.16035	0.118856	0.163391	0.15091	0.147993	0.148485	0.207738	0.165185	0.136615	0.189386	0.149285	0.130449	0.16761	0.165897	0.132255	0.21061	0.132413	0.101305	0.149438	0.164242	0.111308	0.218975	0.102432	0.091053	0.192048	0.071399	0.121243	0.16445
		HU01	0.184755	0.214048	0.15129	0.173896	0.13353	0.187464	0.156054	0.160898	0.133619	0.168117	0.160365	0.197593	0.166834	0.1268	0.193281	0.202572	0.154162	0.157564	0.17357	0.187374	0.223628	0.159232	0.123092	0.185387	0.163257	0.135881	0.236573	0.163306	0.122292	0.215423	0.113982	0.114166	0.267754	0.102295
		RO01	0.048577	0.159057	0.067483	0.136191	0.091914	0.102267	0.118832	0.112103	0.086338	0.079239	0.109281	0.149518	0.138805	0.119022	0.071156	0.120999	0.067545	0.09878	0.07114	0.098843	0.064508	0.055171	0.043732	0.068433	0.116179	0.055861	0.139688	0.050241	0.060182	0.174539	0.10331	0.075119	0.188119	0.112763	0.155978
		RO02	0.191585	0.226389	0.144844	0.258706	0.212838	0.162041	0.179021	0.2323	0.173772	0.192549	0.163047	0.294468	0.227009	0.185088	0.201814	0.128213	0.149194	0.161673	0.240832	0.140305	0.181196	0.183385	0.103773	0.202596	0.207119	0.109858	0.220359	0.152349	0.199331	0.256611	0.149292	0.138085	0.197803	0.141837	0.1907	0.135174
		RO03	0.19488	0.224039	0.230298	0.269366	0.241539	0.239025	0.240992	0.258063	0.267402	0.274504	0.267863	0.280668	0.298394	0.262941	0.272327	0.266229	0.230862	0.265766	0.250611	0.28668	0.310102	0.258751	0.251998	0.217684	0.158585	0.208786	0.304437	0.24366	0.196881	0.209284	0.196029	0.196793	0.372199	0.29822	0.255737	0.203211	0.342101
		ENGLAND	0.063659	0.136186	0.040601	0.137144	0.083343	0.086429	0.107151	0.10408	0.065997	0.051002	0.083294	0.157236	0.111131	0.113563	0.044465	0.098816	0.070679	0.070042	0.078342	0.053213	0.048553	0.031057	0.01304	0.092942	0.089109	0.055899	0.066717	0.056841	0.079796	0.148493	0.089519	0.060245	0.163003	0.112875	0.13432	0.03516	0.100663	0.211912
		IRELAND	0.063041	0.153111	0.048912	0.124765	0.080437	0.089563	0.115461	0.092926	0.063881	0.056443	0.094544	0.152461	0.108478	0.11612	0.043396	0.104821	0.085207	0.065486	0.07818	0.064357	0.046265	0.018679	0.022389	0.097587	0.094547	0.070936	0.079065	0.053559	0.076755	0.173125	0.103798	0.063459	0.20543	0.124509	0.139546	0.039993	0.126701	0.224932	0.007823
		WALES	0.075085	0.142027	0.049024	0.144898	0.104967	0.082641	0.116969	0.118595	0.06011	0.059556	0.084934	0.172233	0.128804	0.109931	0.055952	0.105518	0.064357	0.06213	0.103391	0.065265	0.067889	0.043506	0.025748	0.106296	0.100025	0.066817	0.091802	0.075672	0.100073	0.16245	0.095201	0.070245	0.177287	0.127304	0.143097	0.044507	0.087541	0.229611	0.004663	0.016205
			PT01	PT02	PT03	SP01	SP02	SP03	SP04	SP05	SP06	SP07	SP08	SP09	SP10	SP11	SP12	SP13	SP14	SP15	SP16	SP17	FR01	FR02	FR03	IT01	IT02	IT03	IT04	IT05	IT06	IT07	IT08	IT09	SK02	SK03	HU01	RO01	RO02	RO03	ENGLAND	IRELAND	WALES

## Sheet: summary Fst 
S9 Table European sites cf. England, ireland, Wales: Summary of Fst analyses
Pairwise Fst scores <0.05			WALES	ENGLAND	IRELAND	Eng Ire Wal SITE TYPES
European sites		Genepool	number of scores <0.05 in the various datasets			A	B	C	D	E	site	dominant type
	PT01	D								Y	PT01	Ancient historic Garden trees
	PT02	D									PT02
	PT03	D	4	6	3	Y	X	Y	Y	Y	PT03	Ancient trees and stools incl garden trees
	SP01	D									SP01
	SP02	C									SP02
	SP03	D									SP03
	SP04	D									SP04
	SP05	D									SP05
	SP06	C	2								SP06
	SP07	D	3	3	1				Y	Y	SP07	ancient trees and garden trees
	SP08	C									SP08
	SP09	D									SP09
	SP10	C									SP10
	SP11	D									SP11
	SP12	C	2	5	4	Y	X	Y	Y		SP12	ancient trees and coppice
	SP13	D									SP13
	SP14	D	3								SP14
	SP15	C									SP15
	SP16	C									SP16
	SP17	C									SP17
	FR01	C		4	3	Y	X		Y		FR01
	FR02	C	2	6	6	Y	Y		Y		FR02	modern trees and coppice
	FR03	C	6	6	4	Y	Y	Y	Y	Y	FR03	all types
	IT01	C									IT01
	IT02	D									IT02
	IT03	C	3	2							IT03
	IT04	C									IT04
	IT05	C		4	1		Y				IT05	modern coppice
	IT06	D									IT06
	IT07	D									IT07
	IT08	D									IT08
	IT09	D		1	1						IT09
	SK02	C									SK02
	SK03	D									SK03
	HU01	D									HU01
	RO01	C	5	6	4	Y	Y	Y	Y	Y	RO01	all types
	RO02	C									RO02
	RO03	D									RO03
